# Supplementary material for: Unravelling the factors affecting the stability and reactivity of dehydro-pyrazole, isothiazole and isoxazole radical isomers: a computational study
Source: Royal Society of Chemistry journal article supplement (doi:10.1039/d4nj00455h), 2024-01-01
Supplement: d4nj00455h1.pdf [file d4nj00455h1.pdf]

## Supporting Information

### **Unravelling the factors affecting the stability and reactivity of dehydro- pyrazole, isothiazole and isoxazole radical isomers: A computational study**

Anjali Mahadevan<sup>†</sup>, Piyush Kumar<sup>†</sup>, Shabana Butt<sup>†</sup>, Archana Velloth and Sugumar Venkataramani\*

Department of Chemical Sciences, Indian Institute of Science Education and Research (IISER)  
Mohali, Sector-81, Knowledge city, SAS Nagar, Mohali, Punjab – 140306, India

E-mail: [sugumarv@iisermohali.ac.in](mailto:sugumarv@iisermohali.ac.in)

(<sup>†</sup>=Equally contributed)

**Table S1.** Electronic and thermodynamic parameters of all parent molecules, their respective radical isomers, ring-opened and fragmented products and transition states at both B3LYP/cc-pVTZ (normal) and M06-2X/cc-pVTZ (italics) levels of theory.

| Species                   | Thermal corrected Electronic energy (E) (Hartree) | ZPVE (Hartree)  | Lowest frequency (cm <sup>-1</sup> ) | Spin Contamination  |                    | Point group     | Electronic state            | Free Energy (G) (Hartree) | Enthalpy (H) (Hartree) | Entropy (S) (Cal/Mol-Kelvin) |
|---------------------------|---------------------------------------------------|-----------------|--------------------------------------|---------------------|--------------------|-----------------|-----------------------------|---------------------------|------------------------|------------------------------|
|                           |                                                   |                 |                                      | Before annihilation | After annihilation |                 |                             |                           |                        |                              |
| <b>1</b>                  | -226.209748                                       | 0.071140        | 531.70                               | 0.0000              | 0.0000             | C <sub>5</sub>  | <sup>1</sup> A'             | -226.239729               | -226.208804            | 65.086                       |
|                           | -226.114545                                       | <i>0.071914</i> | <i>562.04</i>                        | <i>0.0000</i>       | <i>0.0000</i>      | C <sub>5</sub>  | <sup>1</sup> A'             | -226.144448               | -226.113601            | 64.922                       |
| <b>1a</b>                 | -225.538307                                       | 0.055377        | 423.77                               | 0.7663              | 0.7500             | C <sub>2v</sub> | <sup>2</sup> A <sub>2</sub> | -225.568524               | -225.537363            | 65.585                       |
|                           | -225.442220                                       | <i>0.056248</i> | <i>473.65</i>                        | <i>0.7653</i>       | <i>0.7500</i>      | C <sub>2v</sub> | <sup>2</sup> A <sub>2</sub> | -225.472331               | -225.441276            | 65.362                       |
| <b>TS<sub>1a-4</sub></b>  | -225.467189                                       | 0.051063        | 353.77i                              | 0.7613              | 0.7501             | C <sub>1</sub>  | <sup>2</sup> A              | -225.500069               | -225.466245            | 71.190                       |
|                           | -225.363794                                       | <i>0.052613</i> | <i>396.35i</i>                       | <i>0.7698</i>       | <i>0.7502</i>      | C <sub>1</sub>  | <sup>2</sup> A              | -225.395432               | -225.362849            | 68.575                       |
| <b>4</b>                  | -225.483340                                       | 0.052217        | 158.75                               | 0.7649              | 0.7501             | C <sub>5</sub>  | <sup>2</sup> A'             | -225.517202               | -225.482396            | 73.255                       |
|                           | -225.382007                                       | <i>0.053213</i> | <i>158.98</i>                        | <i>0.7765</i>       | <i>0.7502</i>      | C <sub>5</sub>  | <sup>2</sup> A'             | -225.415712               | -225.381063            | 72.925                       |
| <b>TS<sub>4-5,6</sub></b> | -225.433484                                       | 0.047995        | 461.24i                              | 0.7729              | 0.7503             | C <sub>1</sub>  | <sup>2</sup> A              | -225.469120               | -225.432540            | 76.989                       |
|                           | -225.326151                                       | <i>0.048891</i> | <i>524.30i</i>                       | <i>0.7767</i>       | <i>0.7504</i>      | C <sub>1</sub>  | <sup>2</sup> A              | -225.361386               | -225.325206            | 76.147                       |
| <b>5</b>                  | -148.111012                                       | 0.018682        | 484.77                               | 0.7653              | 0.7501             | C <sub>5</sub>  | <sup>2</sup> A''            | -148.137955               | -148.110068            | 58.694                       |
|                           | -148.042586                                       | <i>0.018971</i> | <i>499.55</i>                        | <i>0.7679</i>       | <i>0.7501</i>      | C <sub>5</sub>  | <sup>2</sup> A''            | -148.069520               | -148.041641            | 58.675                       |
| <b>6</b>                  | -77.333757                                        | 0.026986        | 649.91                               | 0.0000              | 0.0000             | D <sub>∞H</sub> | <sup>1</sup> Σ <sub>g</sub> | -77.355515                | -77.332812             | 47.782                       |
|                           | -77.294242                                        | <i>0.027520</i> | <i>712.49</i>                        | <i>0.0000</i>       | <i>0.0000</i>      | D <sub>∞H</sub> | <sup>1</sup> Σ <sub>g</sub> | -77.315896                | -77.293298             | 47.560                       |
| <b>7</b>                  | -225.461158                                       | 0.050629        | 96.59                                | 1.7666              | 0.8063             | C <sub>1</sub>  | <sup>2</sup> A              | -225.495490               | -225.460214            | 74.244                       |
|                           | -225.347915                                       | <i>0.051291</i> | <i>106.59</i>                        | <i>1.7603</i>       | <i>0.7848</i>      | C <sub>1</sub>  | <sup>2</sup> A              | -225.382202               | -225.346970            | 74.152                       |
| <b>7-q</b>                | -225.476599                                       | 0.050967        | 125.01                               | 3.8237              | 3.7517             | C <sub>1</sub>  | <sup>4</sup> A              | -225.511174               | -225.475655            | 74.755                       |
|                           | -225.370200                                       | <i>0.051388</i> | <i>118.74</i>                        | <i>3.8438</i>       | <i>3.7527</i>      | C <sub>1</sub>  | <sup>4</sup> A              | -225.404781               | -225.369256            | 74.768                       |
| <b>TS<sub>7-8,9</sub></b> | -225.400888                                       | 0.044434        | 230.60i                              | 0.7875              | 0.7508             | C <sub>1</sub>  | <sup>2</sup> A              | -225.436574               | -225.399944            | 77.095                       |
|                           | -225.288058                                       | <i>0.045379</i> | <i>423.14i</i>                       | <i>0.8034</i>       | <i>0.7515</i>      | C <sub>1</sub>  | <sup>2</sup> A              | -225.323227               | -225.287114            | 76.006                       |
| <b>8</b>                  | -132.021325                                       | 0.029690        | 221.51                               | 0.7538              | 0.7500             | C <sub>5</sub>  | <sup>2</sup> A              | -132.049704               | -132.020380            | 61.717                       |
|                           | -131.964919                                       | <i>0.030955</i> | <i>523.54</i>                        | <i>0.7535</i>       | <i>0.7500</i>      | C <sub>5</sub>  | <sup>2</sup> A              | -131.992590               | -131.963974            | 60.227                       |
| <b>9</b>                  | -93.445024                                        | 0.016348        | 762.08                               | 0.0000              | 0.0000             | C <sub>∞V</sub> | <sup>1</sup> Σ              | -93.464383                | -93.441539             | 48.079                       |
|                           | -93.403545                                        | <i>0.016580</i> | <i>787.95</i>                        | <i>0.0000</i>       | <i>0.0000</i>      | C <sub>∞V</sub> | <sup>1</sup> Σ              | -93.425418                | -93.402601             | 48.022                       |
| <b>TS<sub>8-10</sub></b>  | -131.931554                                       | 0.025019        | 1405.00i                             | 0.7564              | 0.7500             | C <sub>1</sub>  | <sup>2</sup> A              | -131.959016               | -131.930610            | 59.785                       |
|                           | -131.877273                                       | <i>0.025839</i> | <i>1284.36i</i>                      | <i>0.7554</i>       | <i>0.7500</i>      | C <sub>1</sub>  | <sup>2</sup> A              | -131.904667               | -131.876329            | 59.644                       |
| <b>10</b>                 | -132.053915                                       | 0.031300        | 421.99                               | 0.7585              | 0.7500             | C <sub>5</sub>  | <sup>2</sup> A'             | -132.053915               | -132.025176            | 60.486                       |
|                           | -131.969225                                       | <i>0.031831</i> | <i>512.10</i>                        | <i>0.7584</i>       | <i>0.7500</i>      | C <sub>5</sub>  | <sup>2</sup> A'             | -131.996865               | -131.968281            | 60.161                       |

|                              |             |          |          |        |        |                 |                             |             |             |        |
|------------------------------|-------------|----------|----------|--------|--------|-----------------|-----------------------------|-------------|-------------|--------|
| <b>TS<sub>10-11</sub></b>    | -132.023658 | 0.029404 | 504.58i  | 0.7754 | 0.7502 | C <sub>S</sub>  | <sup>2</sup> A'             | -132.051534 | -132.022714 | 60.656 |
|                              | -131.961440 | 0.029717 | 618.90i  | 0.7743 | 0.7502 | C <sub>S</sub>  | <sup>2</sup> A'             | -131.989341 | -131.960495 | 60.711 |
| <b>11</b>                    | -132.110859 | 0.030977 | 384.73   | 0.7672 | 0.7501 | C <sub>2v</sub> | <sup>2</sup> B <sub>1</sub> | -132.138074 | -132.109915 | 59.267 |
|                              | -132.047446 | 0.031194 | 379.06   | 0.7676 | 0.7501 | C <sub>2v</sub> | <sup>2</sup> B <sub>1</sub> | -132.074697 | -132.046502 | 59.343 |
| <b>TS<sub>1a-12,13</sub></b> | -225.437212 | 0.045748 | 275.60i  | 1.3403 | 0.7937 | C <sub>1</sub>  | <sup>2</sup> A              | -225.472321 | -225.436268 | 75.881 |
|                              | -225.318436 | 0.044772 | 365.67i  | 0.8079 | 0.7519 | C <sub>1</sub>  | <sup>2</sup> A              | -225.353868 | -225.317492 | 76.559 |
| <b>12</b>                    | -115.870744 | 0.038945 | 171.34   | 0.7863 | 0.7503 | C <sub>1</sub>  | <sup>2</sup> A              | -115.900001 | -115.869800 | 63.562 |
|                              | -115.817001 | 0.038918 | 345.28   | 1.7566 | 0.8153 | C <sub>1</sub>  | <sup>2</sup> A              | -115.846013 | -115.816056 | 63.048 |
| <b>13</b>                    | -109.560487 | 0.005582 | 2450.21  | 0.0000 | 0.0000 | D <sub>∞H</sub> | <sup>1</sup> Σ <sub>g</sub> | -109.581273 | -109.559542 | 45.735 |
|                              | -109.524835 | 0.005726 | 2513.41  | 0.0000 | 0.0000 | D <sub>∞H</sub> | <sup>1</sup> Σ <sub>g</sub> | -109.545613 | -109.523891 | 45.718 |
| <b>TS<sub>1a-1b</sub></b>    | -225.365177 | 0.049755 | 1464.08i | 0.7561 | 0.7500 | C <sub>1</sub>  | <sup>2</sup> A              | -225.396100 | -225.364243 | 67.071 |
|                              | -225.273352 | 0.050985 | 1345.96i | 0.7565 | 0.7500 | C <sub>1</sub>  | <sup>2</sup> A              | -225.304077 | -225.272407 | 66.653 |
| <b>1b</b>                    | -225.525610 | 0.058101 | 458.79   | 0.7552 | 0.7500 | C <sub>S</sub>  | <sup>2</sup> A'             | -225.556228 | -225.524666 | 66.427 |
|                              | -225.434250 | 0.059118 | 501.24   | 0.7590 | 0.7500 | C <sub>S</sub>  | <sup>2</sup> A'             | -225.464735 | -225.433306 | 66.148 |
| <b>TS<sub>1b-14</sub></b>    | -225.497250 | 0.053735 | 579.85i  | 0.7819 | 0.7502 | C <sub>1</sub>  | <sup>2</sup> A              | -225.528412 | -225.496306 | 67.572 |
|                              | -225.393929 | 0.054137 | 727.29i  | 0.7871 | 0.7504 | C <sub>1</sub>  | <sup>2</sup> A              | -225.425058 | -225.392984 | 67.505 |
| <b>14</b>                    | -225.571171 | 0.054611 | 166.09   | 0.7811 | 0.7505 | C <sub>1</sub>  | <sup>2</sup> A              | -225.604577 | -225.570227 | 72.296 |
|                              | -225.469590 | 0.055258 | 169.48   | 0.7804 | 0.7505 | C <sub>1</sub>  | <sup>2</sup> A              | -225.502984 | -225.468646 | 72.271 |
| <b>TS<sub>14-15</sub></b>    | -225.484907 | 0.049411 | 1806.63i | 0.7576 | 0.7500 | C <sub>1</sub>  | <sup>2</sup> A              | -225.518345 | -225.483963 | 72.364 |
|                              | -225.383804 | 0.050027 | 1775.21i | 0.7581 | 0.7500 | C <sub>1</sub>  | <sup>2</sup> A              | -225.417243 | -225.382859 | 72.367 |
| <b>15</b>                    | -225.550883 | 0.054446 | 132.04   | 0.7533 | 0.7500 | C <sub>S</sub>  | <sup>2</sup> A'             | -225.585210 | -225.549939 | 74.235 |
|                              | -225.453437 | 0.055179 | 148.59   | 0.7544 | 0.7500 | C <sub>S</sub>  | <sup>2</sup> A'             | -225.487587 | -225.452493 | 73.862 |
| <b>TS<sub>15-16,11</sub></b> | -225.520412 | 0.049500 | 413.66i  | 0.7666 | 0.7502 | C <sub>S</sub>  | <sup>2</sup> A'             | -225.556409 | -225.519468 | 77.748 |
|                              | -225.421530 | 0.050040 | 467.40i  | 0.7654 | 0.7502 | C <sub>S</sub>  | <sup>2</sup> A'             | -225.457330 | -225.420586 | 77.335 |
| <b>16</b>                    | -93.420183  | 0.015618 | 469.89   | 0.0000 | 0.0000 | C <sub>∞v</sub> | <sup>1</sup> Σ              | -93.442539  | -93.419239  | 49.040 |
|                              | -93.939131  | 0.016016 | 530.61   | 0.0000 | 0.0000 | C <sub>∞v</sub> | <sup>1</sup> Σ              | -93.405340  | -93.382187  | 48.729 |
| <b>TS<sub>1b-17</sub></b>    | -225.437219 | 0.052657 | 299.58i  | 0.7633 | 0.7501 | C <sub>1</sub>  | <sup>2</sup> A              | -225.469333 | -225.436274 | 69.578 |
|                              | -225.341540 | 0.053499 | 380.62i  | 0.7713 | 0.7503 | C <sub>1</sub>  | <sup>2</sup> A              | -225.373389 | -225.373389 | 69.018 |
| <b>17</b>                    | -225.444293 | 0.052794 | 136.07   | 0.7596 | 0.7500 | C <sub>1</sub>  | <sup>2</sup> A              | -225.478580 | -225.443349 | 74.149 |
|                              | -225.351668 | 0.053981 | 146.68   | 0.7661 | 0.7501 | C <sub>1</sub>  | <sup>2</sup> A              | -225.385567 | -225.350724 | 73.332 |
| <b>TS<sub>17-18,6</sub></b>  | -225.415985 | 0.048836 | 543.10i  | 0.7736 | 0.7503 | C <sub>1</sub>  | <sup>2</sup> A              | -225.451774 | -225.415040 | 77.312 |
|                              | -225.314270 | 0.049592 | 622.53i  | 0.7761 | 0.7504 | C <sub>1</sub>  | <sup>2</sup> A              | -225.349751 | -225.313326 | 76.661 |
| <b>18</b>                    | -148.099919 | 0.019397 | 363.80   | 0.7602 | 0.7500 | C <sub>1</sub>  | <sup>2</sup> A              | -148.127316 | -148.098974 | 59.650 |
|                              | -148.037374 | 0.019712 | 383.29   | 0.7624 | 0.7500 | C <sub>1</sub>  | <sup>2</sup> A              | -148.064693 | -148.036430 | 59.485 |
| <b>TS<sub>1a-1c</sub></b>    | -225.345192 | 0.049375 | 1570.96i | 0.7541 | 0.7500 | C <sub>1</sub>  | <sup>2</sup> A              | -225.376110 | -225.34428  | 67.060 |
|                              | -225.254441 | 0.050932 | 1386.80i | 0.7556 | 0.7500 | C <sub>1</sub>  | <sup>2</sup> A              | -225.285116 | -225.253497 | 66.547 |
| <b>TS<sub>1b-1c</sub></b>    | -225.405898 | 0.051783 | 1605.51i | 0.7674 | 0.7501 | C <sub>1</sub>  | <sup>2</sup> A              | -225.436500 | -225.404954 | 66.394 |
|                              | -225.309543 | 0.052749 | 1345.51i | 0.7660 | 0.7500 | C <sub>1</sub>  | <sup>2</sup> A              | -225.340086 | -225.308599 | 66.271 |
| <b>1c</b>                    | -225.520154 | 0.058529 | 511.55   | 0.7561 | 0.7500 | C <sub>S</sub>  | <sup>2</sup> A'             | -225.550681 | -225.519210 | 66.236 |
|                              | -225.428529 | 0.059350 | 548.71   | 0.7592 | 0.7500 | C <sub>S</sub>  | <sup>2</sup> A'             | -225.458953 | -225.427585 | 66.020 |

|                             |             |          |          |        |        |                |                  |             |             |        |
|-----------------------------|-------------|----------|----------|--------|--------|----------------|------------------|-------------|-------------|--------|
| <b>TS<sub>1c-29</sub></b>   | -225.453180 | 0.052712 | 554.26i  | 0.7821 | 0.7503 | C <sub>1</sub> | <sup>2</sup> A   | -225.484794 | -225.452236 | 68.524 |
|                             | -225.347765 | 0.053068 | 614.19i  | 0.7829 | 0.7503 | C <sub>1</sub> | <sup>2</sup> A   | -225.379440 | -225.346820 | 68.655 |
| <b>29</b>                   | -225.489908 | 0.052915 | 149.82   | 0.7623 | 0.7501 | C <sub>1</sub> | <sup>2</sup> A   | -225.523692 | -225.488963 | 73.094 |
|                             | -225.385747 | 0.053803 | 155.11   | 0.7582 | 0.7500 | C <sub>1</sub> | <sup>2</sup> A   | -225.419377 | -225.384803 | 72.767 |
| <b>TS<sub>29-30</sub></b>   | -225.381201 | 0.045496 | 1603.57i | 0.7754 | 0.7504 | C <sub>1</sub> | <sup>2</sup> A   | -225.415501 | -225.380257 | 74.177 |
|                             | -225.270293 | 0.046388 | 1609.97i | 0.7855 | 0.7508 | C <sub>1</sub> | <sup>2</sup> A   | -225.304518 | -225.269349 | 74.020 |
| <b>30</b>                   | -225.445476 | 0.051265 | 36.18    | 0.7714 | 0.7501 | C <sub>1</sub> | <sup>2</sup> A   | -225.481495 | -225.444532 | 77.796 |
|                             | -225.340307 | 0.052373 | 103.16   | 0.7895 | 0.7504 | C <sub>1</sub> | <sup>2</sup> A   | -225.375307 | -225.339363 | 75.651 |
| <b>TS<sub>30-6,18</sub></b> | -225.412599 | 0.048577 | 548.93i  | 0.7901 | 0.7505 | C <sub>1</sub> | <sup>2</sup> A   | -225.448794 | -225.411655 | 78.166 |
|                             | -225.306668 | 0.049242 | 692.73i  | 0.8074 | 0.7510 | C <sub>1</sub> | <sup>2</sup> A   | -225.342580 | -225.305724 | 77.570 |
| <b>TS<sub>1a-1d</sub></b>   | -225.448258 | 0.051674 | 1614.92i | 0.7570 | 0.7500 | C <sub>1</sub> | <sup>2</sup> A   | -225.478652 | -225.447314 | 65.956 |
|                             | -225.354859 | 0.052837 | 1531.84i | 0.7580 | 0.7500 | C <sub>1</sub> | <sup>2</sup> A   | -225.385143 | -225.353915 | 65.725 |
| <b>TS<sub>1b-1d</sub></b>   | -225.324366 | 0.050729 | 899.56i  | 0.7576 | 0.7500 | C <sub>1</sub> | <sup>2</sup> A   | -225.355172 | -225.323422 | 66.825 |
|                             | -225.232119 | 0.051895 | 835.92i  | 0.7592 | 0.7501 | C <sub>1</sub> | <sup>2</sup> A   | -225.262834 | -225.231175 | 66.633 |
| <b>TS<sub>1c-1d</sub></b>   | -225.424126 | 0.052350 | 1345.54i | 0.7570 | 0.7500 | C <sub>1</sub> | <sup>2</sup> A   | -225.454666 | -225.423182 | 66.264 |
|                             | -225.332171 | 0.053578 | 1178.88i | 0.7581 | 0.7500 | C <sub>1</sub> | <sup>2</sup> A   | -225.362505 | -225.331226 | 65.831 |
| <b>1d</b>                   | -225.521793 | 0.058172 | 444.88   | 0.7570 | 0.7500 | C <sub>5</sub> | <sup>2</sup> A'  | -225.552422 | -225.520849 | 66.452 |
|                             | -225.429911 | 0.059205 | 513.80   | 0.7606 | 0.7500 | C <sub>5</sub> | <sup>2</sup> A'  | -225.460371 | -225.428966 | 66.097 |
| <b>TS<sub>1d-35</sub></b>   | -225.485375 | 0.053733 | 548.14i  | 0.7925 | 0.7503 | C <sub>1</sub> | <sup>2</sup> A   | -225.516400 | -225.484431 | 67.283 |
|                             | -225.379069 | 0.054117 | 710.09i  | 0.7996 | 0.7506 | C <sub>1</sub> | <sup>2</sup> A   | -225.410064 | -225.378125 | 67.221 |
| <b>35</b>                   | -225.535094 | 0.053106 | 145.29   | 0.7618 | 0.7501 | C <sub>1</sub> | <sup>2</sup> A   | -225.569101 | -225.534150 | 73.561 |
|                             | -225.432604 | 0.053629 | 138.31   | 0.7669 | 0.7501 | C <sub>1</sub> | <sup>2</sup> A   | -225.466636 | -225.431660 | 73.614 |
| <b>TS<sub>35-36,9</sub></b> | -225.491002 | 0.048243 | 545.83i  | 0.7764 | 0.7504 | C <sub>1</sub> | <sup>2</sup> A   | -225.527415 | -225.490058 | 78.623 |
|                             | -225.386664 | 0.048892 | 616.67i  | 0.7816 | 0.7507 | C <sub>1</sub> | <sup>2</sup> A   | -225.422678 | -225.385720 | 77.784 |
| <b>36</b>                   | -132.064425 | 0.029449 | 338.99   | 0.7686 | 0.7501 | C <sub>1</sub> | <sup>2</sup> A   | -132.092451 | -132.063480 | 60.974 |
|                             | -132.998971 | 0.029761 | 421.59   | 0.7744 | 0.7502 | C <sub>1</sub> | <sup>2</sup> A   | -132.026778 | -132.998027 | 60.511 |
| <b>TS<sub>1d-37</sub></b>   | -225.431253 | 0.051915 | 427.35i  | 0.7805 | 0.7504 | C <sub>1</sub> | <sup>2</sup> A   | -225.463523 | -225.430308 | 69.905 |
|                             | -225.330303 | 0.052578 | 548.48i  | 0.7858 | 0.7507 | C <sub>1</sub> | <sup>2</sup> A   | -225.362357 | -225.329359 | 69.450 |
| <b>37</b>                   | -225.448855 | 0.052307 | 156.66   | 0.7555 | 0.7500 | C <sub>1</sub> | <sup>2</sup> A   | -225.483308 | -225.447911 | 74.500 |
|                             | -225.350470 | 0.053444 | 164.73   | 0.7593 | 0.7500 | C <sub>1</sub> | <sup>2</sup> A   | -225.384456 | -225.349526 | 73.516 |
| <b>TS<sub>37-36,9</sub></b> | -225.440801 | 0.049325 | 707.06i  | 0.7692 | 0.7501 | C <sub>1</sub> | <sup>2</sup> A   | -225.475566 | -225.439856 | 75.157 |
|                             | -225.337547 | 0.050046 | 827.65i  | 0.7701 | 0.7502 | C <sub>1</sub> | <sup>2</sup> A   | -225.372004 | -225.336603 | 74.508 |
| <b>2</b>                    | -569.083714 | 0.054970 | 485.57   | 0.0000 | 0.0000 | C <sub>5</sub> | <sup>1</sup> A'  | -569.114679 | -569.082770 | 67.158 |
|                             | -568.979504 | 0.055780 | 492.58   | 0.0000 | 0.0000 | C <sub>5</sub> | <sup>1</sup> A'  | -568.010385 | -568.978559 | 66.983 |
| <b>2b</b>                   | -568.411064 | 0.042106 | 463.57   | 0.7569 | 0.7500 | C <sub>5</sub> | <sup>2</sup> A'  | -568.442745 | -568.410119 | 68.667 |
|                             | -568.308843 | 0.042946 | 476.40   | 0.7605 | 0.7501 | C <sub>5</sub> | <sup>2</sup> A'  | -568.340351 | -568.307899 | 68.301 |
| <b>TS<sub>2b-19</sub></b>   | -568.405425 | 0.040696 | 377.18i  | 0.7739 | 0.7501 | C <sub>5</sub> | <sup>2</sup> A'  | -568.437247 | -568.404481 | 68.962 |
|                             | -568.297535 | 0.041293 | 585.38i  | 0.7778 | 0.7502 | C <sub>5</sub> | <sup>2</sup> A'  | -568.329294 | -568.296590 | 68.830 |
| <b>19</b>                   | -568.441109 | 0.040654 | 139.12   | 0.7823 | 0.7504 | C <sub>5</sub> | <sup>2</sup> A'' | -568.475596 | -568.440165 | 74.572 |
|                             | -568.328971 | 0.041040 | 111.34   | 0.7543 | 0.7500 | C <sub>5</sub> | <sup>2</sup> A'  | -568.363838 | -568.328027 | 75.369 |

|                              |             |          |          |        |        |                |              |             |             |        |
|------------------------------|-------------|----------|----------|--------|--------|----------------|--------------|-------------|-------------|--------|
| <b>TS<sub>19-20</sub></b>    | -568.364269 | 0.036139 | 1521.40i | 0.7542 | 0.7500 | $C_1$          | $^2A$        | -568.398792 | -568.363324 | 74.647 |
|                              | -568.255636 | 0.036790 | 1478.04i | 0.7543 | 0.7500 | $C_1$          | $^2A$        | -568.290168 | -568.254692 | 74.666 |
| <b>20</b>                    | -568.414385 | 0.040673 | 116.35   | 0.7555 | 0.7500 | $C_5$          | $^2A'$       | -568.449700 | -568.413441 | 76.313 |
|                              | -568.307944 | 0.041403 | 113.49   | 0.7571 | 0.7500 | $C_5$          | $^2A'$       | -568.343180 | -568.307000 | 76.147 |
| <b>TS<sub>20-11,21</sub></b> | -568.362097 | 0.035849 | 225.17i  | 0.7739 | 0.7504 | $C_5$          | $^2A'$       | -568.400127 | -568.361152 | 82.030 |
|                              | -568.251277 | 0.036754 | 338.71i  | 0.7751 | 0.7504 | $C_5$          | $^2A'$       | -568.288495 | -568.250332 | 80.219 |
| <b>21</b>                    | -436.253980 | 0.002969 | 1303.24  | 0.0000 | 0.0000 | $C_{\infty V}$ | $^1\Sigma$   | -436.276927 | -436.253036 | 50.283 |
|                              | -436.204808 | 0.003036 | 1332.73  | 0.0000 | 0.0000 | $C_{\infty V}$ | $^1\Sigma$   | -436.227741 | -436.203863 | 50.255 |
| <b>TS<sub>2b-22</sub></b>    | -568.330194 | 0.036514 | 246.31i  | 0.7632 | 0.7501 | $C_5$          | $^2A'$       | -568.363812 | -568.329250 | 72.743 |
|                              | -568.174612 | 0.037993 | 93.77i   | 0.7577 | 0.7500 | $C_5$          | $^2A''$      | -568.208004 | -568.173668 | 72.266 |
| <b>22</b>                    | -568.335114 | 0.036499 | 117.00   | 0.7604 | 0.7501 | $C_5$          | $^2A'$       | -568.371166 | -568.334169 | 77.866 |
|                              | -568.233963 | 0.037714 | 121.80   | 0.7679 | 0.7501 | $C_5$          | $^2A'$       | -568.269513 | -568.233019 | 76.809 |
| <b>TS<sub>22-6,23</sub></b>  | -568.324739 | 0.034885 | 334.35i  | 0.7701 | 0.7502 | $C_5$          | $^2A'$       | -568.362093 | -568.323795 | 80.605 |
|                              | -568.219017 | 0.035550 | 380.39i  | 0.7721 | 0.7502 | $C_5$          | $^2A'$       | -568.255915 | -568.218073 | 79.645 |
| <b>23</b>                    | -77.333757  | 0.026986 | 649.96   | 0.0000 | 0.0000 | $D_{\infty H}$ | $^1\Sigma_g$ | -77.355516  | -77.332813  | 47.782 |
|                              | -77.294242  | 0.027520 | 712.50   | 0.0000 | 0.0000 | $D_{\infty H}$ | $^1\Sigma_g$ | -77.315896  | -77.293298  | 47.560 |
| <b>TS<sub>2b-2c</sub></b>    | -568.283406 | 0.034720 | 2338.27i | 0.7751 | 0.7502 | $C_1$          | $^2A$        | -568.315536 | -568.282461 | 69.611 |
|                              | -568.177599 | 0.035288 | 2596.05i | 0.7739 | 0.7502 | $C_1$          | $^2A$        | -568.209846 | -568.176654 | 69.858 |
| <b>2c</b>                    | -568.400778 | 0.042340 | 469.17   | 0.7570 | 0.7500 | $C_5$          | $^2A'$       | -568.432331 | -568.399833 | 68.398 |
|                              | -568.299109 | 0.043209 | 481.38   | 0.7612 | 0.7501 | $C_5$          | $^2A'$       | -568.330535 | -568.298165 | 68.129 |
| <b>TS<sub>2c-31</sub></b>    | -568.364387 | 0.03965  | 389.76i  | 0.7804 | 0.7503 | $C_5$          | $^2A'$       | -568.396714 | -568.363443 | 70.024 |
|                              | -568.254749 | 0.040208 | 432.79i  | 0.7789 | 0.7504 | $C_5$          | $^2A'$       | -568.286994 | -568.253805 | 69.852 |
| <b>31</b>                    | -568.390143 | 0.040073 | 108.14   | 0.7596 | 0.7501 | $C_5$          | $^2A'$       | -568.424946 | -568.389199 | 75.237 |
|                              | -568.279384 | 0.040802 | 99.71    | 0.7604 | 0.7501 | $C_5$          | $^2A'$       | -568.314150 | -568.278439 | 75.158 |
| <b>TS<sub>31-32</sub></b>    | -568.294330 | 0.031464 | 1679.91i | 0.7730 | 0.7503 | $C_5$          | $^2A'$       | -568.329336 | -568.293386 | 75.663 |
|                              | -568.175250 | 0.031773 | 1835.47i | 0.7809 | 0.7505 | $C_5$          | $^2A'$       | -568.210153 | -568.174305 | 75.447 |
| <b>32</b>                    | -568.357596 | 0.038640 | 98.52    | 0.7704 | 0.7501 | $C_5$          | $^2A'$       | -568.392699 | -568.356652 | 75.868 |
|                              | -568.245675 | 0.039596 | 104.54   | 0.7829 | 0.7503 | $C_5$          | $^2A'$       | -568.280515 | -568.244731 | 75.313 |
| <b>TS<sub>32-6,23</sub></b>  | -568.313916 | 0.035579 | 504.10i  | 0.7818 | 0.7503 | $C_1$          | $^2A$        | -568.351012 | -568.312972 | 80.063 |
|                              | -568.200039 | 0.036152 | 638.18i  | 0.7985 | 0.7506 | $C_1$          | $^2A$        | -568.236786 | -568.199095 | 79.327 |
| <b>TS<sub>2b-2d</sub></b>    | -568.205935 | 0.035140 | 1007.39i | 0.7660 | 0.7501 | $C_1$          | $^2A$        | -568.238064 | -568.204990 | 69.608 |
|                              | -568.105937 | 0.036173 | 1027.32i | 0.7649 | 0.7501 | $C_1$          | $^2A$        | -568.137851 | -568.104993 | 69.155 |
| <b>TS<sub>2c-2d</sub></b>    | -568.309703 | 0.036178 | 1298.59i | 0.7590 | 0.7500 | $C_1$          | $^2A$        | -568.341514 | -568.308759 | 68.938 |
|                              | -568.207550 | 0.036851 | 1100.26i | 0.7600 | 0.7501 | $C_1$          | $^2A$        | -568.239198 | -568.206605 | 68.597 |
| <b>2d</b>                    | -568.399299 | 0.042506 | 440.47   | 0.7589 | 0.7500 | $C_5$          | $^2A'$       | -568.430850 | -568.398355 | 68.392 |
|                              | -568.297802 | 0.043334 | 465.13   | 0.7635 | 0.7501 | $C_5$          | $^2A'$       | -568.329231 | -568.296857 | 68.136 |
| <b>TS<sub>2d-38</sub></b>    | -568.368356 | 0.039869 | 326.42i  | 0.8180 | 0.7507 | $C_5$          | $^2A'$       | -568.400391 | -568.367412 | 69.411 |
|                              | -568.254627 | 0.040362 | 425.66i  | 0.8296 | 0.7513 | $C_5$          | $^2A'$       | -568.286589 | -568.253682 | 69.259 |
| <b>38</b>                    | -568.399045 | 0.039148 | 122.34   | 0.7629 | 0.7501 | $C_5$          | $^2A'$       | -568.434107 | -568.398101 | 75.781 |
|                              | -568.286571 | 0.039654 | 117.05   | 0.7686 | 0.7501 | $C_5$          | $^2A'$       | -568.321731 | -568.285627 | 75.988 |

|                              |             |          |          |        |        |                 |                 |             |             |        |
|------------------------------|-------------|----------|----------|--------|--------|-----------------|-----------------|-------------|-------------|--------|
| <b>TS<sub>38-39,9</sub></b>  | -568.366417 | 0.035540 | 594.75i  | 0.7778 | 0.7504 | C <sub>1</sub>  | <sup>2</sup> A  | -568.402932 | -568.365473 | 78.839 |
|                              | -568.253009 | 0.036035 | 700.09i  | 0.7890 | 0.7508 | C <sub>1</sub>  | <sup>2</sup> A  | -568.289290 | -568.252065 | 78.348 |
| <b>39</b>                    | -474.944279 | 0.018211 | 747.72   | 0.7653 | 0.7501 | C <sub>∞V</sub> | -               | -474.971318 | -474.943335 | 58.895 |
|                              | -474.871254 | 0.018482 | 336.16   | 0.7700 | 0.7501 | C <sub>∞V</sub> | -               | -474.898137 | -474.870310 | 58.567 |
| <b>TS<sub>2d-40</sub></b>    | -568.323304 | 0.036150 | 417.08i  | 0.7684 | 0.7502 | C <sub>S</sub>  | <sup>2</sup> A' | -568.356757 | -568.322360 | 72.395 |
|                              | -568.215718 | 0.036931 | 481.68i  | 0.7722 | 0.7503 | C <sub>S</sub>  | <sup>2</sup> A' | -568.248859 | -568.214774 | 71.738 |
| <b>40</b>                    | -568.338173 | 0.036257 | 124.52   | 0.7564 | 0.7500 | C <sub>S</sub>  | <sup>2</sup> A' | -568.374143 | -568.337229 | 77.693 |
|                              | -568.230802 | 0.037495 | 128.91   | 0.7586 | 0.7500 | C <sub>S</sub>  | <sup>2</sup> A' | -568.266228 | -568.229858 | 76.547 |
| <b>TS<sub>40-39,9</sub></b>  | -568.339075 | 0.035031 | 369.66i  | 0.7613 | 0.7501 | C <sub>S</sub>  | <sup>2</sup> A' | -568.374814 | -568.338131 | 77.208 |
|                              | -568.229868 | 0.035656 | 592.40i  | 0.7662 | 0.7501 | C <sub>S</sub>  | <sup>2</sup> A' | -568.265330 | -568.228923 | 76.624 |
| <b>3</b>                     | -246.064665 | 0.057820 | 610.24   | 0.0000 | 0.0000 | C <sub>S</sub>  | <sup>1</sup> A' | -246.094429 | -246.063720 | 64.631 |
|                              | -245.964623 | 0.058834 | 620.50   | 0.0000 | 0.0000 | C <sub>S</sub>  | <sup>1</sup> A' | -245.994296 | -245.963678 | 64.439 |
| <b>3b</b>                    | -245.381102 | 0.044512 | 576.43   | 0.7568 | 0.7500 | C <sub>S</sub>  | <sup>2</sup> A' | -245.411543 | -245.380158 | 66.055 |
|                              | -245.284065 | 0.045843 | 607.49   | 0.7609 | 0.7501 | C <sub>S</sub>  | <sup>2</sup> A' | -245.314315 | -245.283121 | 65.655 |
| <b>TS<sub>3b-24</sub></b>    | -245.378062 | 0.042460 | 492.83i  | 0.7780 | 0.7502 | C <sub>S</sub>  | <sup>2</sup> A' | -245.408660 | -245.377118 | 66.386 |
|                              | -245.271786 | 0.042918 | 633.82i  | 0.7917 | 0.7505 | C <sub>S</sub>  | <sup>2</sup> A' | -245.302405 | -245.270841 | 66.431 |
| <b>24</b>                    | -245.462041 | 0.041907 | 159.49   | 0.7729 | 0.7504 | C <sub>1</sub>  | <sup>2</sup> A  | -245.495445 | -245.461097 | 72.291 |
|                              | -245.358088 | 0.042669 | 161.78   | 0.7746 | 0.7504 | C <sub>1</sub>  | <sup>2</sup> A  | -245.391443 | -245.357144 | 72.188 |
| <b>TS<sub>24-25</sub></b>    | -245.391404 | 0.037807 | 1606.44i | 0.7541 | 0.7500 | C <sub>1</sub>  | <sup>2</sup> A  | -245.424509 | -245.390460 | 71.663 |
|                              | -245.287093 | 0.038521 | 1572.63i | 0.7558 | 0.7500 | C <sub>1</sub>  | <sup>2</sup> A  | -245.320151 | -245.286148 | 71.565 |
| <b>25</b>                    | -245.455733 | 0.042457 | 129.26   | 0.7532 | 0.7500 | C <sub>1</sub>  | <sup>2</sup> A  | -245.489903 | -245.454789 | 73.902 |
|                              | -245.355890 | 0.043227 | 137.73   | 0.7536 | 0.7500 | C <sub>1</sub>  | <sup>2</sup> A  | -245.389916 | -245.354916 | 73.602 |
| <b>TS<sub>25-26,11</sub></b> | -245.444196 | 0.039098 | 402.73i  | 0.7655 | 0.7502 | C <sub>S</sub>  | <sup>2</sup> A' | -245.480529 | -245.443251 | 78.458 |
|                              | -245.342910 | 0.039512 | 446.43i  | 0.7659 | 0.7502 | C <sub>S</sub>  | <sup>2</sup> A' | -245.378683 | -245.341966 | 77.277 |
| <b>26</b>                    | -113.349855 | 0.005038 | 2211.46  | 0.0000 | 0.0000 | C <sub>∞V</sub> | <sup>1</sup> Σ  | -113.371334 | -113.348911 | 47.195 |
|                              | -113.311338 | 0.005156 | 2263.37  | 0.0000 | 0.0000 | C <sub>∞V</sub> | <sup>1</sup> Σ  | -113.332811 | -113.310394 | 47.179 |
| <b>TS<sub>3b-27</sub></b>    | -245.286134 | 0.039232 | 255.02i  | 0.7608 | 0.7501 | C <sub>S</sub>  | <sup>2</sup> A' | -245.318258 | -245.285189 | 69.599 |
|                              | -245.188278 | 0.040463 | 351.60i  | 0.7692 | 0.7502 | C <sub>S</sub>  | <sup>2</sup> A' | -245.219981 | -245.187334 | 68.712 |
| <b>27</b>                    | -245.290516 | 0.039522 | 134.50   | 0.7589 | 0.7500 | C <sub>1</sub>  | <sup>2</sup> A  | -245.324693 | -245.289571 | 73.920 |
|                              | -245.195892 | 0.040700 | 146.96   | 0.7651 | 0.7501 | C <sub>1</sub>  | <sup>2</sup> A  | -245.229665 | -245.194948 | 73.069 |
| <b>TS<sub>27-28,6</sub></b>  | -245.273431 | 0.036546 | 510.57i  | 0.7706 | 0.7502 | C <sub>1</sub>  | <sup>2</sup> A  | -245.308802 | -245.272487 | 76.432 |
|                              | -245.166917 | 0.037057 | 606.68i  | 0.7752 | 0.7503 | C <sub>1</sub>  | <sup>2</sup> A  | -245.202514 | -245.165972 | 76.907 |
| <b>28</b>                    | -167.956534 | 0.007880 | 326.48   | 0.7574 | 0.7500 | C <sub>∞V</sub> | <sup>2</sup> A' | -167.977600 | -167.955590 | 46.325 |
|                              | -167.889105 | 0.009283 | 390.40   | 0.7610 | 0.7500 | C <sub>∞V</sub> | <sup>2</sup> A' | -167.914116 | -167.888161 | 54.627 |
| <b>TS<sub>3b-3c</sub></b>    | -245.252253 | 0.037168 | 2119.66i | 0.7758 | 0.7502 | C <sub>1</sub>  | <sup>2</sup> A  | -245.283200 | -245.251309 | 67.120 |
|                              | -245.148485 | 0.038290 | 3135.72i | 0.7754 | 0.7502 | C <sub>1</sub>  | <sup>2</sup> A  | -245.179263 | -245.147540 | 66.767 |
| <b>3c</b>                    | -245.373346 | 0.045212 | 547.67   | 0.7566 | 0.7500 | C <sub>S</sub>  | <sup>2</sup> A' | -245.403650 | -245.372402 | 65.767 |
|                              | -245.276616 | 0.046379 | 573.47   | 0.7601 | 0.7500 | C <sub>S</sub>  | <sup>2</sup> A' | -245.306797 | -245.275671 | 65.509 |
| <b>TS<sub>3c-33</sub></b>    | -245.325493 | 0.041256 | 601.51i  | 0.8008 | 0.7509 | C <sub>S</sub>  | <sup>2</sup> A' | -245.306797 | -245.324549 | 65.509 |
|                              | -245.214241 | 0.041750 | 838.96i  | 0.8153 | 0.7517 | C <sub>S</sub>  | <sup>2</sup> A' | -245.245203 | -245.213297 | 67.152 |

|                             |             |          |          |        |        |                |                  |             |             |        |
|-----------------------------|-------------|----------|----------|--------|--------|----------------|------------------|-------------|-------------|--------|
| <b>33</b>                   | -245.372816 | 0.041956 | 151.42   | 0.7623 | 0.7501 | C <sub>5</sub> | <sup>2</sup> A'  | -245.406073 | -245.371871 | 71.983 |
|                             | -245.265674 | 0.042849 | 152.46   | 0.7667 | 0.7501 | C <sub>5</sub> | <sup>2</sup> A'  | -245.298768 | -245.264730 | 71.640 |
| <b>TS<sub>33-34</sub></b>   | -245.268474 | 0.032475 | 1771.09i | 0.7802 | 0.7505 | C <sub>1</sub> | <sup>2</sup> A   | -245.302523 | -245.267530 | 73.648 |
|                             |             |          |          |        |        |                |                  |             |             |        |
| <b>34</b>                   | -245.339224 | 0.040699 | 95.87    | 0.7654 | 0.7501 | C <sub>5</sub> | <sup>2</sup> A'  | -245.373186 | -245.338280 | 73.466 |
|                             | -245.231472 | 0.041738 | 117.58   | 0.7768 | 0.7502 | C <sub>5</sub> | <sup>2</sup> A'  | -245.265025 | -245.230528 | 72.605 |
| <b>TS<sub>34-6,28</sub></b> | -245.284761 | 0.037141 | 347.87i  | 0.7731 | 0.7502 | C <sub>5</sub> | <sup>2</sup> A'  | -245.321049 | -245.283817 | 78.362 |
|                             | -245.175209 | 0.038045 | 461.19i  | 0.7861 | 0.7505 | C <sub>5</sub> | <sup>2</sup> A'  | -245.210534 | -245.174265 | 76.336 |
| <b>TS<sub>3b-3d</sub></b>   | -245.165290 | 0.036854 | 887.15i  | 0.8542 | 0.7515 | C <sub>1</sub> | <sup>2</sup> A   | -245.196309 | -245.164346 | 67.272 |
|                             | -245.064590 | 0.038014 | 930.77i  | 0.9120 | 0.7525 | C <sub>1</sub> | <sup>2</sup> A   | -245.095511 | -245.063646 | 67.065 |
| <b>TS<sub>3c-3d</sub></b>   | -245.271510 | 0.037658 | 1376.91i | 0.7562 | 0.7500 | C <sub>1</sub> | <sup>2</sup> A   | -245.302134 | -245.270565 | 66.442 |
|                             | -245.173564 | 0.039535 | 1240.52i | 0.7588 | 0.7500 | C <sub>1</sub> | <sup>2</sup> A   | -245.203831 | -245.172620 | 65.689 |
| <b>3d</b>                   | -245.378335 | 0.044608 | 571.45   | 0.7585 | 0.7500 | C <sub>5</sub> | <sup>2</sup> A'  | -245.408754 | -245.377391 | 66.009 |
|                             | -245.281273 | 0.045896 | 602.76   | 0.7619 | 0.7501 | C <sub>5</sub> | <sup>2</sup> A'  | -245.311505 | -245.280329 | 65.614 |
| <b>TS<sub>3d-41</sub></b>   | -245.374552 | 0.042302 | 492.82i  | 0.7793 | 0.7502 | C <sub>1</sub> | <sup>2</sup> A   | -245.405097 | -245.373608 | 66.276 |
|                             | -245.265975 | 0.042452 | 701.25i  | 0.7957 | 0.7504 | C <sub>1</sub> | <sup>2</sup> A   | -245.296566 | -245.265031 | 66.371 |
| <b>41</b>                   | -245.378339 | 0.044605 | 571.72   | 0.7586 | 0.7500 | C <sub>1</sub> | <sup>2</sup> A'  | -245.408761 | -245.377395 | 66.015 |
|                             | -245.281340 | 0.045842 | 605.65   | 0.7620 | 0.7501 | C <sub>1</sub> | <sup>2</sup> A'  | -245.311567 | -245.280396 | 65.604 |
| <b>TS<sub>41-42,9</sub></b> | -245.359891 | 0.037492 | 685.13i  | 0.8018 | 0.7512 | C <sub>5</sub> | <sup>2</sup> A'' | -245.394316 | -245.358947 | 74.440 |
|                             | -245.396656 | 0.037680 | 456.19i  | 0.7653 | 0.7501 | C <sub>5</sub> | 2A               | -245.431936 | -245.395712 | 76.240 |
| <b>42</b>                   | -151.964235 | 0.018767 | 476.27   | 0.7578 | 0.7500 | C <sub>5</sub> | <sup>2</sup> A'' | -151.991200 | -151.963291 | 58.741 |
|                             | -151.896622 | 0.018943 | 393.29   | 0.7617 | 0.7501 | C <sub>5</sub> | <sup>2</sup> A'' | -151.923601 | -151.895678 | 58.770 |

**Table S2.** Relative energies of the dehydro- pyrazole (**1a-1d**), isothiazole (**2b-2d**) and isoxazole (**3b-3d**) radicals at different levels of theory.

| Radicals  | Relative Energies (kcal/mol) |                      |                   |                                      |                                       |
|-----------|------------------------------|----------------------|-------------------|--------------------------------------|---------------------------------------|
|           | (U)B3LYP/cc-pVTZ             | (U)B3LYP-GD3/cc-pVTZ | (U)M06-2X/cc-pVTZ | (U)CCSD(T)/cc-pVTZ//(U)B3LYP/cc-pVTZ | (U)CCSD(T)/cc-pVTZ//(U)M06-2X/cc-pVTZ |
| <b>1a</b> | 0                            | 0                    | 0                 | 0                                    | 0                                     |
| <b>1b</b> | 10.4                         | 8.1                  | 5.2               | 8.2                                  | 8.1                                   |
| <b>1c</b> | 11.5                         | 11.6                 | 8.9               | 11.4                                 | 11.3                                  |
| <b>1d</b> | 10.5                         | 10.6                 | 7.9               | 10.4                                 | 10.3                                  |
| <b>2b</b> | 0                            | 0                    | 0                 | 0                                    | 0                                     |
| <b>2c</b> | 6.5                          | 6.6                  | 6.1               | 6.1                                  | 6.1                                   |
| <b>2d</b> | 7.4                          | 7.4                  | 7.0               | 6.5                                  | 6.5                                   |
| <b>3b</b> | 0                            | 0                    | 0                 | 0                                    | 0                                     |
| <b>3c</b> | 4.9                          | 5.0                  | 4.7               | 4.3                                  | 4.3                                   |
| <b>3d</b> | 1.7                          | 1.8                  | 1.8               | 1.7                                  | 1.6                                   |

**Table S3.** Radical stabilization energies (RSEs) of the dehydro- pyrazole (**1a-1d**), isothiazole (**2b-2d**) and isoxazole (**3b-3d**) radicals at (U)B3LYP/cc-pVTZ and (U)M06-2X/cc-pVTZ levels of theory.

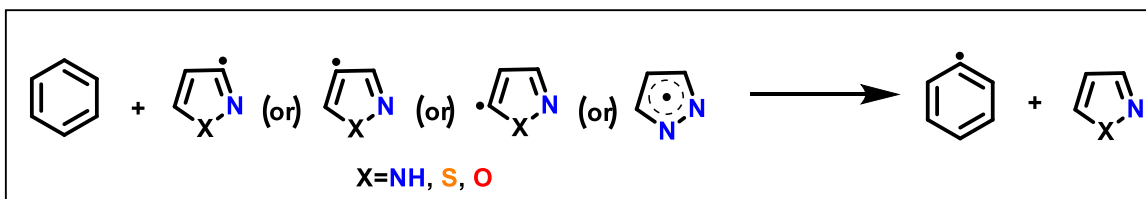

| Radicals  | Radical Stabilization Energies (kcal/mol) |                   |
|-----------|-------------------------------------------|-------------------|
|           | (U)B3LYP/cc-pVTZ                          | (U)M06-2X/cc-pVTZ |
| <b>1a</b> | 2.9                                       | 0.3               |
| <b>1b</b> | -5.0                                      | -4.7              |
| <b>1c</b> | -8.5                                      | -8.4              |
| <b>1d</b> | -7.4                                      | -7.4              |
| <b>2b</b> | 2.2                                       | 1.4               |
| <b>2c</b> | -4.3                                      | -4.7              |
| <b>2d</b> | -5.2                                      | -5.6              |



|           |      |      |
|-----------|------|------|
| <b>3b</b> | -4.7 | -4.8 |
| <b>3c</b> | -9.5 | -9.5 |
| <b>3d</b> | -6.4 | -6.6 |

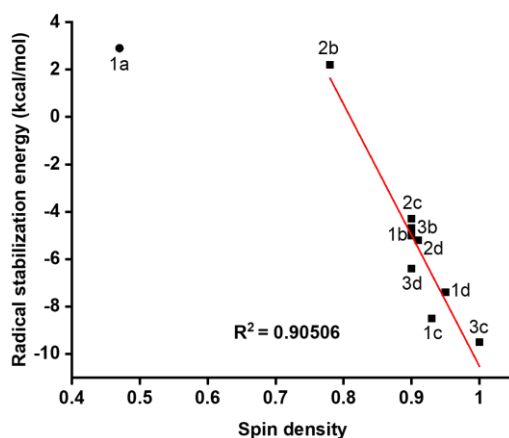

**Figure S1.** Correlation diagram of Radical stabilization energy with spin density.

**Table S4.** Bond dissociation energies (BDEs) of the dehydro- pyrazole (**1a-1d**), isothiazole (**2b-2d**) and isoxazole (**3b-3d**) radicals at B3LYP/cc-pVTZ (normal) and M06-2X/cc-pVTZ (italics) levels of theory.

| Radicals  | BDE (kcal/mol)   |                   |         |       |
|-----------|------------------|-------------------|---------|-------|
|           | (U)B3LYP/cc-pVTZ | (U)M06-2X/cc-pVTZ | CBS-QB3 | G4    |
| <b>1a</b> | 107.7            | 110.7             | 107.9   | 107.3 |
| <b>1b</b> | 115.7            | 115.8             | 115.5   | 116.6 |
| <b>1c</b> | 119.1            | 119.5             | 118.9   | 119.7 |
| <b>1d</b> | 118.1            | 118.5             | 117.8   | 118.6 |
| <b>2b</b> | 108.5            | 109.7             | 108.5   | 109.5 |
| <b>2c</b> | 114.9            | 115.8             | 114.9   | 115.6 |
| <b>2d</b> | 115.8            | 116.7             | 115.7   | 116.4 |
| <b>3b</b> | 115.3            | 115.9             | 115.2   | 116.3 |
| <b>3c</b> | 120.2            | 120.6             | 120.1   | 120.8 |
| <b>3d</b> | 117.0            | 117.3             | 117.0   | 117.6 |

**Table S5.** Resonance stabilization energies of the dehydro- pyrazole (**1a-1d**), isothiazole (**2b-2d**) and isoxazole (**3b-3d**) radicals at B3LYP/cc-pVTZ (normal) and M06-2X/cc-pVTZ (italics) levels of theory.

| Reactants                                                                           | Products                                                                            | Resonance stabilization energy ( $\Delta H$ ) kcal/mol |
|-------------------------------------------------------------------------------------|-------------------------------------------------------------------------------------|--------------------------------------------------------|
| 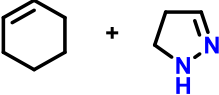   |    | -21.6/-23.6                                            |
|    |    | 3.1/0.4                                                |
|    |    | -15.8/-18.7                                            |
|    |    | 21.1/16.3                                              |
|   |   | 11.0/6.3                                               |
|  |  | -13.8/-15.1                                            |
|  |  | -7.8/-9.9                                              |
|  |  | 25.2/21.3                                              |
|  |  | 15.1/11.8                                              |
|  |  | -13.7/-15.1                                            |
|  |  | -9.4/-11.4                                             |
|  |  | 28.3/23.8                                              |
|  |  | 13.5/10.4                                              |

**Table S6.** Estimated NICS<sub>zz</sub> values at various position of probe atom along the perpendicular axis of the molecular plane of pyrazole **1**, isothiazole **2**, isoxazole **3**, and their dehydro- pyrazole (**1a-1d**), isothiazole (**2b-2d**) and isoxazole (**3b-3d**) radical isomers at B3LYP/cc-pVTZ level of theory.

| Species   | NICS(0) <sub>zz</sub> | NICS(0.5) <sub>zz</sub> | NICS(1) <sub>zz</sub> | NICS(1.5) <sub>zz</sub> | NICS(2) <sub>zz</sub> |
|-----------|-----------------------|-------------------------|-----------------------|-------------------------|-----------------------|
| <b>1</b>  | -17.1495              | -29.5972                | -33.5581              | -24.5152                | -15.7563              |
| <b>1a</b> | 39.2268               | 31.5318                 | 12.4949               | 0.7971                  | -2.5566               |
| <b>1b</b> | -15.3678              | -26.5728                | -29.8249              | -21.6091                | -13.8126              |
| <b>1c</b> | -16.3026              | -28.284                 | -31.2659              | -22.3001                | -14.1051              |
| <b>1d</b> | -10.3691              | -23.3447                | -28.5772              | -21.0505                | -13.4869              |
| <b>2</b>  | -20.6192              | -30.2524                | -33.6632              | -25.4424                | -16.8545              |
| <b>2b</b> | -17.0657              | -25.6837                | -28.827               | -21.8289                | -14.4828              |
| <b>2c</b> | -17.3755              | -27.6949                | -31.3778              | -23.4322                | -15.3383              |
| <b>2d</b> | -13.4948              | -23.0521                | -27.3931              | -20.9148                | -13.8296              |
| <b>3</b>  | -13.279               | -25.0438                | -29.088               | -21.3311                | -13.7499              |
| <b>3b</b> | -8.2726               | -19.0558                | -23.3965              | -17.3767                | -11.2525              |
| <b>3c</b> | -10.6962              | -22.69                  | -26.5222              | -19.1242                | -12.1698              |
| <b>3d</b> | -6.0448               | -17.0623                | -22.2184              | -16.7453                | -10.8786              |

**Table S7.** ELF<sub>σ</sub>, ELF<sub>π</sub> and average ELF bifurcation values of the studied systems.

| Molecules         | ELF <sub>σ</sub> | ELF <sub>π</sub> | Average |
|-------------------|------------------|------------------|---------|
| <b>Parent 1</b>   | 0.7              | 0.9              | 0.8     |
| <b>radical 1a</b> | 0.68             | 0.65             | 0.665   |
| <b>radical 1b</b> | 0.71             | 0.88             | 0.795   |
| <b>radical 1c</b> | 0.67             | 0.91             | 0.79    |
| <b>radical 1d</b> | 0.7              | 0.86             | 0.78    |
| <b>Parent 2</b>   | 0.72             | 0.93             | 0.825   |
| <b>radical 2b</b> | 0.71             | 0.87             | 0.79    |
| <b>radical 2c</b> | 0.74             | 0.89             | 0.815   |
| <b>radical 2d</b> | 0.7              | 0.88             | 0.79    |
| <b>Parent 3</b>   | 0.7              | 0.95             | 0.825   |
| <b>radical 3b</b> | 0.7              | 0.85             | 0.775   |
| <b>radical 3c</b> | 0.66             | 0.88             | 0.77    |
| <b>radical 3d</b> | 0.71             | 0.78             | 0.745   |

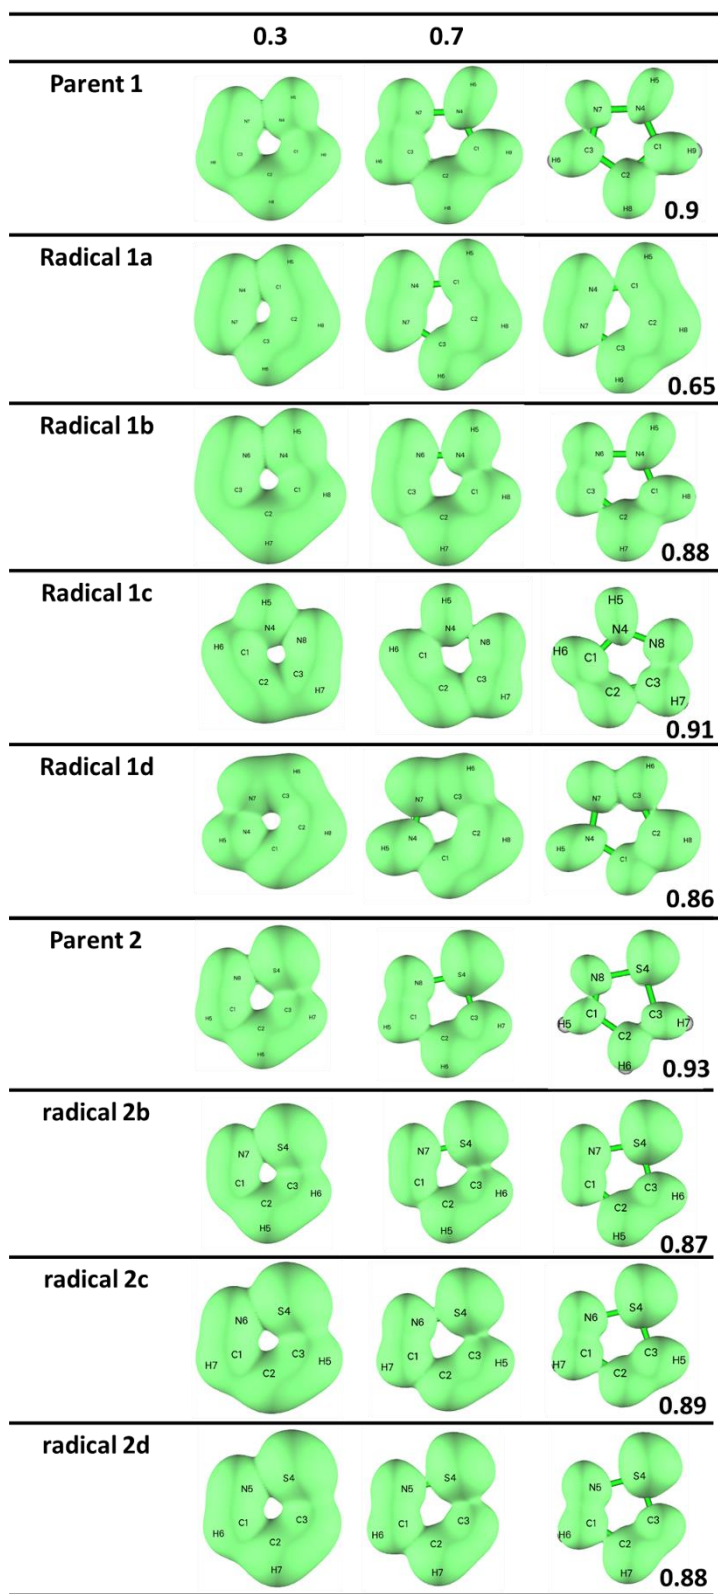

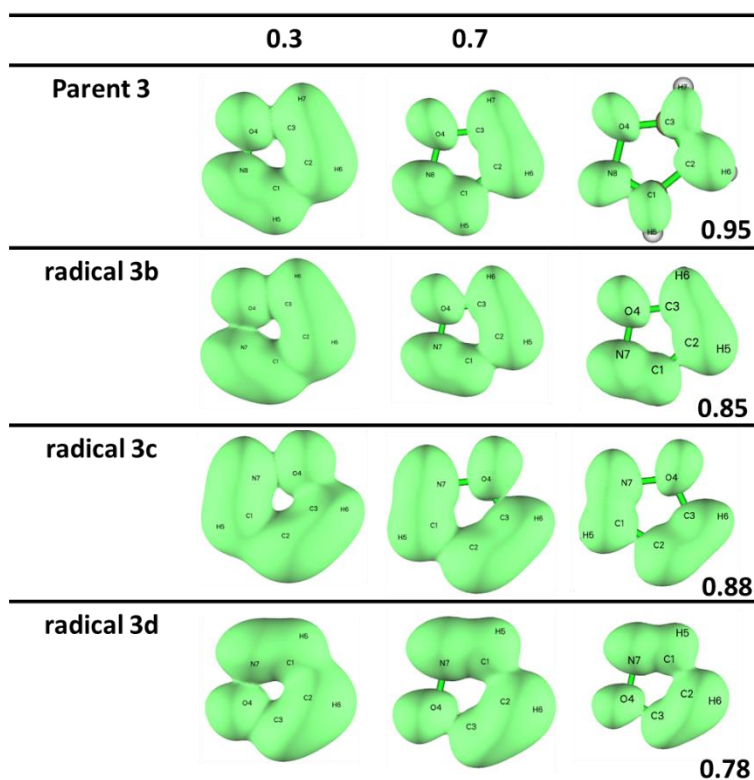

**Figure S2.**  $\pi$  localization domains of the pyrazole **1**, isothiazole **2**, isoxazole **3**, and their dehydro-pyrazole (**1a-1d**), isothiazole (**2b-2d**) and isoxazole (**3b-3d**) radical isomers for  $\text{ELF}_\pi = 0.3, 0.7$ , and their respective bifurcation value.

**Table S8.** The second order perturbation energies (in kcal/mol) for the selected interactions from the natural bond orbital (NBO) analysis for the  $\alpha$  and  $\beta$  spins of the dehydro-pyrazole (**1a-1d**), isothiazole (**2b-2d**) and isoxazole (**3b-3d**) radicals at B3LYP/cc-pVTZ level of theory.

| 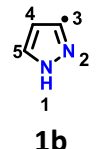<br><b>1b</b> |                           |                  |                 | <br><b>2b</b> |                           |                  |                 | <br><b>3b</b> |                           |                  |                 |
|--------------------------------------------------------------------------------------------------|---------------------------|------------------|-----------------|--------------------------------------------------------------------------------------------------|---------------------------|------------------|-----------------|----------------------------------------------------------------------------------------------------|---------------------------|------------------|-----------------|
| Donor                                                                                            | Acceptor                  | $E^{(2)}_\alpha$ | $E^{(2)}_\beta$ | Donor                                                                                            | Acceptor                  | $E^{(2)}_\alpha$ | $E^{(2)}_\beta$ | Donor                                                                                              | Acceptor                  | $E^{(2)}_\alpha$ | $E^{(2)}_\beta$ |
| $\pi_{\text{C4-C5}}$                                                                             | $\pi^*_{\text{C3-N2}}$    | 13.13            | 13.99           | $\sigma_{\text{C4-C5}}$                                                                          | $\sigma^*_{\text{C3-C4}}$ | 0.39             | 0.78            | $\sigma_{\text{C4-C5}}$                                                                            | $n^*_{\text{C3}}$         | -                | 9.58            |
| $\sigma_{\text{C4-C5}}$                                                                          | $n^*_{\text{C3}}$         | ---              | 9.47            | $\sigma_{\text{C4-C5}}$                                                                          | $\pi^*_{\text{C3-N2}}$    | 10.78            | ---             | $\sigma_{\text{C4-C5}}$                                                                            | $\sigma^*_{\text{C3-C4}}$ | -                | 0.48            |
| $\sigma_{\text{C4-C5}}$                                                                          | $\sigma^*_{\text{C3-C4}}$ | ---              | 0.58            | $\sigma_{\text{C4-C5}}$                                                                          | $n^*_{\text{C3}}$         | ---              | 7.72            | $\pi_{\text{C4-C5}}$                                                                               | $\pi^*_{\text{C3-N2}}$    | 12.23            | 13.16           |
| $\pi^*_{\text{C4-C5}}$                                                                           | $\pi^*_{\text{C3-C4}}$    | ---              | 31.33           | $\pi_{\text{C2-C3}}$                                                                             | $\pi^*_{\text{C3-N2}}$    | ---              | 11.27           | $\pi^*_{\text{C4-C5}}$                                                                             | $\pi^*_{\text{C3-N2}}$    | 58.37            | 20.63           |
| $\sigma_{\text{N1-N2}}$                                                                          | $n^*_{\text{C3}}$         | ---              | 6.30            | $\pi^*_{\text{C4-C5}}$                                                                           | $\pi^*_{\text{C3-N2}}$    | 48.59            | 23.58           | $\sigma_{\text{O1-N2}}$                                                                            | $n^*_{\text{C3}}$         | -                | 8.57            |
| $\sigma_{\text{C4-H7}}$                                                                          | $\sigma^*_{\text{C3-C4}}$ | 0.36             | ---             | $\sigma_{\text{S1-N2}}$                                                                          | $\sigma^*_{\text{C3-C4}}$ | 0.38             | -               | $\sigma^*_{\text{O1-N2}}$                                                                          | $\sigma^*_{\text{C3-C4}}$ | 0.78             | ---             |
| $\sigma_{\text{C4-H7}}$                                                                          | $\sigma^*_{\text{C3-N2}}$ | 0.88             | 0.86            | $\sigma_{\text{S1-N2}}$                                                                          | $n^*_{\text{C3}}$         | -                | 14.01           | $n_{\text{C3}}$                                                                                    | $\sigma^*_{\text{C4-C5}}$ | 2.09             | ---             |
| $n_{\text{C3}}$                                                                                  | $\sigma^*_{\text{C4-C5}}$ | 2.59             | ---             | $\sigma^*_{\text{S1-N2}}$                                                                        | $\sigma^*_{\text{C3-C4}}$ | 0.60             | ---             | $n_{\text{C3}}$                                                                                    | $\sigma^*_{\text{O1-N2}}$ | 10.54            | ---             |
| $n_{\text{C3}}$                                                                                  | $\sigma^*_{\text{N1-N2}}$ | 5.77             | ---             | $n_{\text{C3}}$                                                                                  | $\sigma^*_{\text{C4-C5}}$ | 3.14             | ---             | $n_{1\text{O1}}$                                                                                   | $\sigma^*_{\text{C3-N2}}$ | 0.90             | 1.03            |
| $n_{\text{N1}}$                                                                                  | $\pi^*_{\text{C3-N2}}$    | 13.63            | 10.48           | $n_{\text{C3}}$                                                                                  | $\sigma^*_{\text{S1-N2}}$ | 11.23            | ---             | $n_{2\text{O1}}$                                                                                   | $\pi^*_{\text{C3-N2}}$    | 6.39             | 5.05            |
| $n_{\text{N2}}$                                                                                  | $\sigma^*_{\text{C3-C4}}$ | 3.24             | 2.56            | $n_{1\text{S1}}$                                                                                 | $\sigma^*_{\text{C3-N2}}$ | 1.05             | 1.35            | $n_{\text{N2}}$                                                                                    | $\sigma^*_{\text{C3-C4}}$ | 3.21             | 2.92            |

|                                                                                           |                    |       |       |                                                                                           |                    |       |       |                                                                                             |                    |       |       |
|-------------------------------------------------------------------------------------------|--------------------|-------|-------|-------------------------------------------------------------------------------------------|--------------------|-------|-------|---------------------------------------------------------------------------------------------|--------------------|-------|-------|
| $n_{N2}$                                                                                  | $n^*_{C3}$         | ---   | 7.32  | $n2_{S1}$                                                                                 | $\pi^*_{C3-N2}$    | 6.54  | 5.11  | $n_{N2}$                                                                                    | $n^*_{C3}$         | -     | 4.81  |
|                                                                                           |                    |       |       | $n_{N2}$                                                                                  | $n^*_{C3}$         | ---   | 7.05  | $\sigma_{C4-H6}$                                                                            | $\sigma^*_{C3-N2}$ | 0.85  | 0.83  |
|                                                                                           |                    |       |       | $n_{N2}$                                                                                  | $\sigma^*_{C3-C4}$ | 4.49  | 3.39  | $\sigma_{C4-H6}$                                                                            | $\sigma^*_{C3-C4}$ | 0.32  | -     |
|                                                                                           |                    |       |       | $\sigma_{C4-H6}$                                                                          | $\sigma^*_{C3-N2}$ | 1.16  | 1.12  |                                                                                             |                    |       |       |
| 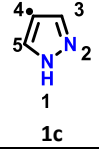<br>1c   |                    |       |       | <br>2c   |                    |       |       | <br>3c   |                    |       |       |
| $\sigma_{C3-N2}$                                                                          | $\pi^*_{C4-C5}$    | 6.77  | ---   | $\sigma_{C3-N2}$                                                                          | $\sigma^*_{C3-C4}$ | 0.39  | 0.61  | $\sigma_{C3-N2}$                                                                            | $\sigma^*_{C1-C2}$ | 0.31  | 0.49  |
| $\pi_{C3-N2}$                                                                             | $\pi^*_{C4-C5}$    | ---   | 7.92  | $\sigma_{C3-N2}$                                                                          | $n^*_{C4}$         | ---   | 5.0   | $\sigma_{C3-N2}$                                                                            | $n^*_{C2}$         | ---   | 5.85  |
| $\pi^*_{C3-N2}$                                                                           | $\pi^*_{C4-C5}$    | 60.33 | 32.21 | $\pi_{C3-N2}$                                                                             | $\pi^*_{C4-C5}$    | 5.31  | ---   | $\pi_{C3-N2}$                                                                               | $\pi^*_{C2-C3}$    | 4.82  | 5.85  |
| $\sigma_{C5-N1}$                                                                          | $n^*_{C4}$         | ---   | 5.89  | $\pi^*_{C3-N2}$                                                                           | $\pi^*_{C4-C5}$    | 57.10 | 32.23 | $\pi^*_{C3-N2}$                                                                             | $\pi^*_{C2-C3}$    | 42.78 | 24.13 |
| $\sigma_{C5-N1}$                                                                          | $\sigma^*_{C4-C5}$ | ---   | 0.34  | $\sigma_{C5-S1}$                                                                          | $\sigma^*_{C4-C5}$ | ---   | 0.27  | $\sigma_{C5-O1}$                                                                            | $n^*_{C2}$         | ---   | 5.12  |
| $\sigma_{C3-N2}$                                                                          | $n^*_{C4}$         | ---   | 6.33  | $\sigma_{C5-S1}$                                                                          | $n^*_{C4}$         | ---   | 10.75 | $n_{C4}$                                                                                    | $\sigma^*_{C1-N7}$ | 3.09  | ---   |
| $\sigma_{C3-N2}$                                                                          | $\sigma^*_{C3-C4}$ | ---   | 0.43  | $n_{C4}$                                                                                  | $\sigma^*_{C3-N2}$ | 3.98  | ---   | $n_{C4}$                                                                                    | $\sigma^*_{C3-O4}$ | 4.50  | ---   |
| $n_{C4}$                                                                                  | $\sigma^*_{C5-N1}$ | 3.59  | ---   | $n_{C4}$                                                                                  | $\sigma^*_{C5-S1}$ | 6.35  | ---   | $n1_{O1}$                                                                                   | $\sigma^*_{C2-C3}$ | 1.53  | 1.76  |
| $n_{C4}$                                                                                  | $\sigma^*_{C3-N2}$ | 3.32  | ---   | $n1_{S1}$                                                                                 | $\sigma^*_{C4-C5}$ | 0.67  | ---   | $n2_{O1}$                                                                                   | $\pi^*_{C2-C3}$    | 16.29 | 13.24 |
| $n_{N1}$                                                                                  | $\pi^*_{C4-C5}$    | 19.59 | 15.54 | $n1_{S1}$                                                                                 | $\sigma^*_{C3-N2}$ | -     | 1.60  | $n_{N2}$                                                                                    | $\sigma^*_{C1-C2}$ | 2.46  | 3.11  |
| $n_{N2}$                                                                                  | $\sigma^*_{C3-C4}$ | 2.50  | 3.15  | $n2_{S1}$                                                                                 | $\pi^*_{C4-C5}$    | 10.97 | ---   | $n_{N2}$                                                                                    | $n^*_{C2}$         | ---   | 0.43  |
| $n_{N2}$                                                                                  | $n^*_{C4}$         | ---   | 0.65  | $n2_{S1}$                                                                                 | $\pi^*_{C3-N2}$    | ---   | 10.33 | $\sigma_{C3-H6}$                                                                            | $\sigma^*_{C4-C5}$ | 0.64  | 0.64  |
| $\sigma_{C5-H7}$                                                                          | $\sigma^*_{C4-C5}$ | 0.64  | 0.39  | $n_{N2}$                                                                                  | $\sigma^*_{C3-C4}$ | 3.52  | 4.19  | $\sigma_{C5-H7}$                                                                            | $\sigma^*_{C3-C4}$ | 0.81  | 0.81  |
| $\sigma_{C5-H7}$                                                                          | $\sigma^*_{C3-C4}$ | 0.76  | 0.76  | $n_{N7}$                                                                                  | $n^*_{C4}$         | ---   | 0.51  | $\sigma_{C5-H7}$                                                                            | $\sigma^*_{C4-C5}$ | 0.52  | 0.31  |
| $\sigma_{C3-H8}$                                                                          | $\sigma^*_{C4-C5}$ | 0.81  | 0.80  | $\sigma_{C3-H6}$                                                                          | $\sigma^*_{C4-C5}$ | 1.16  | 1.11  |                                                                                             |                    |       |       |
|                                                                                           |                    |       |       | $\sigma_{C5-H7}$                                                                          | $\sigma^*_{C3-C4}$ | 1.56  | ---   |                                                                                             |                    |       |       |
|                                                                                           |                    |       |       | $\sigma_{C5-H7}$                                                                          | $\sigma^*_{C4-C5}$ | 0.87  | 0.57  |                                                                                             |                    |       |       |
|                                                                                           |                    |       |       | $\sigma_{C5-H7}$                                                                          | $n^*_{C4}$         | ---   | 0.46  |                                                                                             |                    |       |       |
| <br>1d |                    |       |       | <br>2d |                    |       |       | <br>3d |                    |       |       |
| $\sigma_{C3-C4}$                                                                          | $\sigma^*_{C4-C5}$ | 0.31  | 0.56  | $\sigma_{C3-C4}$                                                                          | $\sigma^*_{C4-C5}$ | 0.46  | 0.74  | $\sigma_{C3-C4}$                                                                            | $\sigma^*_{C5-O1}$ | 0.60  | ---   |
| $\sigma_{C3-C4}$                                                                          | $\sigma^*_{C5-N1}$ | 0.30  | ---   | $\sigma_{C3-C4}$                                                                          | $n^*_{C5}$         | ---   | 9.57  | $\sigma_{C3-C4}$                                                                            | $n^*_{C5}$         | ---   | 12.09 |
| $\sigma_{C3-C4}$                                                                          | $n^*_{C5}$         | ---   | 11.29 | $\sigma_{S1-N2}$                                                                          | $\sigma^*_{C5-S1}$ | 0.38  | ---   | $\sigma_{C3-C4}$                                                                            | $\sigma^*_{C4-C5}$ | ---   | 0.52  |
| $\pi^*_{C3-N2}$                                                                           | $\pi^*_{C4-C5}$    | 64.13 | 23.86 | $\sigma_{S1-N2}$                                                                          | $n^*_{C5}$         | ---   | 8.87  | $\pi^*_{C3-N2}$                                                                             | $\pi^*_{C4-C5}$    | 59.03 | 19.06 |
| $\sigma_{N1-N2}$                                                                          | $n^*_{C5}$         | ---   | 6.44  | $\pi^*_{C3-N2}$                                                                           | $\pi^*_{C4-C5}$    | 72.42 | 35.56 | $\sigma_{O1-N2}$                                                                            | $n^*_{C5}$         | ---   | 9.49  |
| $n_{C5}$                                                                                  | $\sigma^*_{C3-C4}$ | 2.30  | ---   | $n_{C5}$                                                                                  | $\sigma^*_{C3-C4}$ | 3.75  | ---   | $n_{C5}$                                                                                    | $\sigma^*_{O1-N2}$ | 6.32  | ---   |
| $n_{C5}$                                                                                  | $\sigma^*_{N1-N2}$ | 5.26  | ---   | $n_{C5}$                                                                                  | $\sigma^*_{S1-N2}$ | 2.10  | ---   | $n_{C5}$                                                                                    | $\sigma^*_{C3-C4}$ | 2.25  | ---   |
| $n_{N1}$                                                                                  | $\pi^*_{C4-C5}$    | 21.03 | 22.39 | $n1_{S1}$                                                                                 | $\sigma^*_{C4-C5}$ | 1.63  | ---   | $n1_{O1}$                                                                                   | $n^*_{C5}$         | ---   | 1.62  |
| $n_{N2}$                                                                                  | $\sigma^*_{C5-N1}$ | 3.25  | 0.59  | $n1_{S1}$                                                                                 | $n^*_{C5}$         | ---   | 1.37  | $n1_{O1}$                                                                                   | $\sigma^*_{C4-C5}$ | 2.32  | 1.93  |
| $n_{N2}$                                                                                  | $n^*_{C5}$         | ---   | 0.59  | $n2_{S1}$                                                                                 | $\pi^*_{C4-C5}$    | 12.89 | 14.36 | $n2_{O1}$                                                                                   | $\pi^*_{C4-C5}$    | 20.21 | 21.65 |
| $\sigma_{C4-H8}$                                                                          | $\sigma^*_{C4-C5}$ | 0.56  | 0.29  | $n_{N2}$                                                                                  | $\sigma^*_{C5-S1}$ | 1.06  | 1.65  | $n_{N2}$                                                                                    | $\sigma^*_{C5-O1}$ | 1.76  | 2.37  |
| $\sigma_{C4-H8}$                                                                          | $\sigma^*_{C5-N1}$ | 1.06  | ---   | $n_{N2}$                                                                                  | $n^*_{C5}$         | ---   | 0.55  | $n_{N2}$                                                                                    | $n^*_{C5}$         | ---   | 0.38  |
| $\sigma_{N1-H6}$                                                                          | $\sigma^*_{C4-C5}$ | 0.86  | 0.77  | $\sigma_{C4-H7}$                                                                          | $\sigma^*_{C4-C5}$ | 0.84  | 0.40  | $\sigma_{C4-H7}$                                                                            | $\sigma^*_{C4-C5}$ | 0.68  | 0.37  |
|                                                                                           |                    |       |       | $\sigma_{C4-H7}$                                                                          | $\sigma^*_{C5-S1}$ | 1.82  | ---   | $\sigma_{C4-H7}$                                                                            | $\sigma^*_{C5-O1}$ | 1.20  | 1.21  |

**Table S9.** Relative electron densities at bond critical points (bcp's) of radical isomers with respect to their corresponding parent and the barrier for the bond cleavage at the B3LYP/cc-pVTZ level of theory. (The radical species having two bond cleavage channels are included.)

| Species   | Bond  | Relative electron densities at bcp w. r. to parent | Bond cleavage barrier (kcal/mol) |
|-----------|-------|----------------------------------------------------|----------------------------------|
| <b>1b</b> | N1-N2 | -0.0189                                            | 15.3                             |
|           | C3-C4 | -0.0080                                            | 52.6                             |
| <b>2b</b> | S1-N2 | -0.0277                                            | 3.6                              |
|           | C3-C4 | -0.0104                                            | 50.1                             |
| <b>3b</b> | O1-N2 | -0.0400                                            | 1.9                              |
|           | C3-C4 | -0.0076                                            | 59.0                             |
| <b>1d</b> | N1-N2 | -0.0177                                            | 22.8                             |
|           | C3-C4 | -0.0049                                            | 56.2                             |
| <b>2d</b> | S1-N2 | -0.0074                                            | 19.3                             |
|           | C3-C4 | -0.0041                                            | 47.0                             |

**Table S10.** NICS(1)<sub>zz</sub> indices for species involving cyclic transition state and their corresponding barrier at B3LYP/cc-pVTZ level of theory.

| TS              | Reactant NICS(1) <sub>zz</sub> | TS NICS(1) <sub>zz</sub> | Difference of NICS(1) <sub>zz</sub> | Barrier (kcal/mol) |
|-----------------|--------------------------------|--------------------------|-------------------------------------|--------------------|
| <b>1a-1b</b>    | 12.4949                        | -8.8073                  | -21.3022                            | 108.6              |
| <b>1a-1c</b>    | 12.4949                        | -4.8259                  | -17.3208                            | 121.1              |
| <b>1a-4</b>     | 12.4949                        | -12.6074                 | -25.1023                            | 44.1               |
| <b>1a-12,13</b> | 12.4949                        | -24.2173                 | -36.7122                            | 62.2               |
| <b>1b-1c</b>    | -29.8249                       | -29.9770                 | -0.1521                             | 72.7               |
| <b>1b-1d</b>    | -29.8249                       | -12.4252                 | 17.3997                             | 116.7              |
| <b>1b-14</b>    | -29.8249                       | -12.4544                 | 17.3705                             | 15.3               |
| <b>1b-17</b>    | -29.8249                       | -8.5235                  | 21.3014                             | 52.6               |
| <b>1c-1d</b>    | -31.2659                       | -23.6812                 | 7.5847                              | 59.2               |
| <b>1c-29</b>    | -31.2659                       | -5.1854                  | 26.0805                             | 41.7               |
| <b>1d-1a</b>    | -28.5772                       | -28.7131                 | -0.1359                             | 46.3               |
| <b>1d-35</b>    | -28.5772                       | -11.4171                 | 17.1601                             | 22.8               |
| <b>1d-37</b>    | -28.5772                       | -6.9319                  | 21.6453                             | 56.2               |
| <b>2b-2c</b>    | -28.827                        | -32.6014                 | -3.7744                             | 79.9               |
| <b>2b-2d</b>    | -28.827                        | 0.4364                   | 29.2634                             | 128.5              |
| <b>2b-19</b>    | -28.827                        | -17.8345                 | 10.9925                             | 3.6                |
| <b>2b-22</b>    | -28.827                        | -9.6445                  | 19.1825                             | 50.1               |
| <b>2c-2d</b>    | -31.3778                       | -22.4144                 | 8.9634                              | 57.0               |
| <b>2c-31</b>    | -31.3778                       | -9.6237                  | 21.7541                             | 22.6               |
| <b>2d-38</b>    | -27.3931                       | -11.4575                 | 15.9356                             | 19.3               |
| <b>2d-40</b>    | -27.3931                       | -6.2060                  | 21.1871                             | 47.0               |

|              |          |          |         |       |
|--------------|----------|----------|---------|-------|
| <b>3b-3c</b> | -23.3965 | -26.6779 | -3.2814 | 80.6  |
| <b>3b-3d</b> | -23.3965 | -0.9772  | 22.4193 | 135.2 |
| <b>3b-24</b> | -23.3965 | -13.1029 | 10.2936 | 1.9   |
| <b>3b-27</b> | -23.3965 | -7.0350  | 16.3615 | 59.0  |
| <b>3c-33</b> | -26.5222 | -2.9606  | 23.5616 | 29.8  |
| <b>3d-3c</b> | -22.2184 | -20.1398 | 2.0786  | 63.7  |
| <b>3d-41</b> | -22.2184 | -15.3244 | 6.894   | 2.3   |

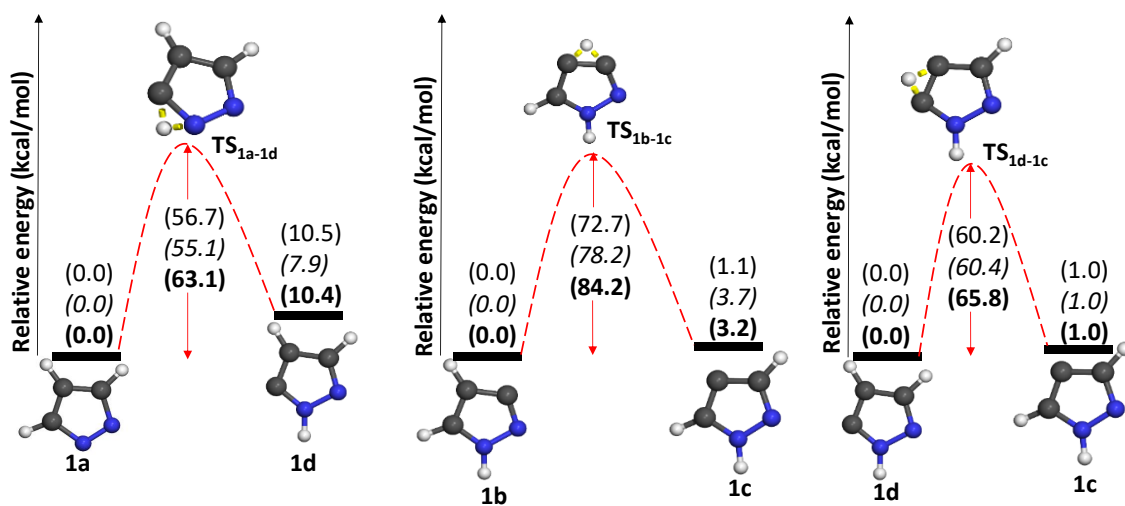



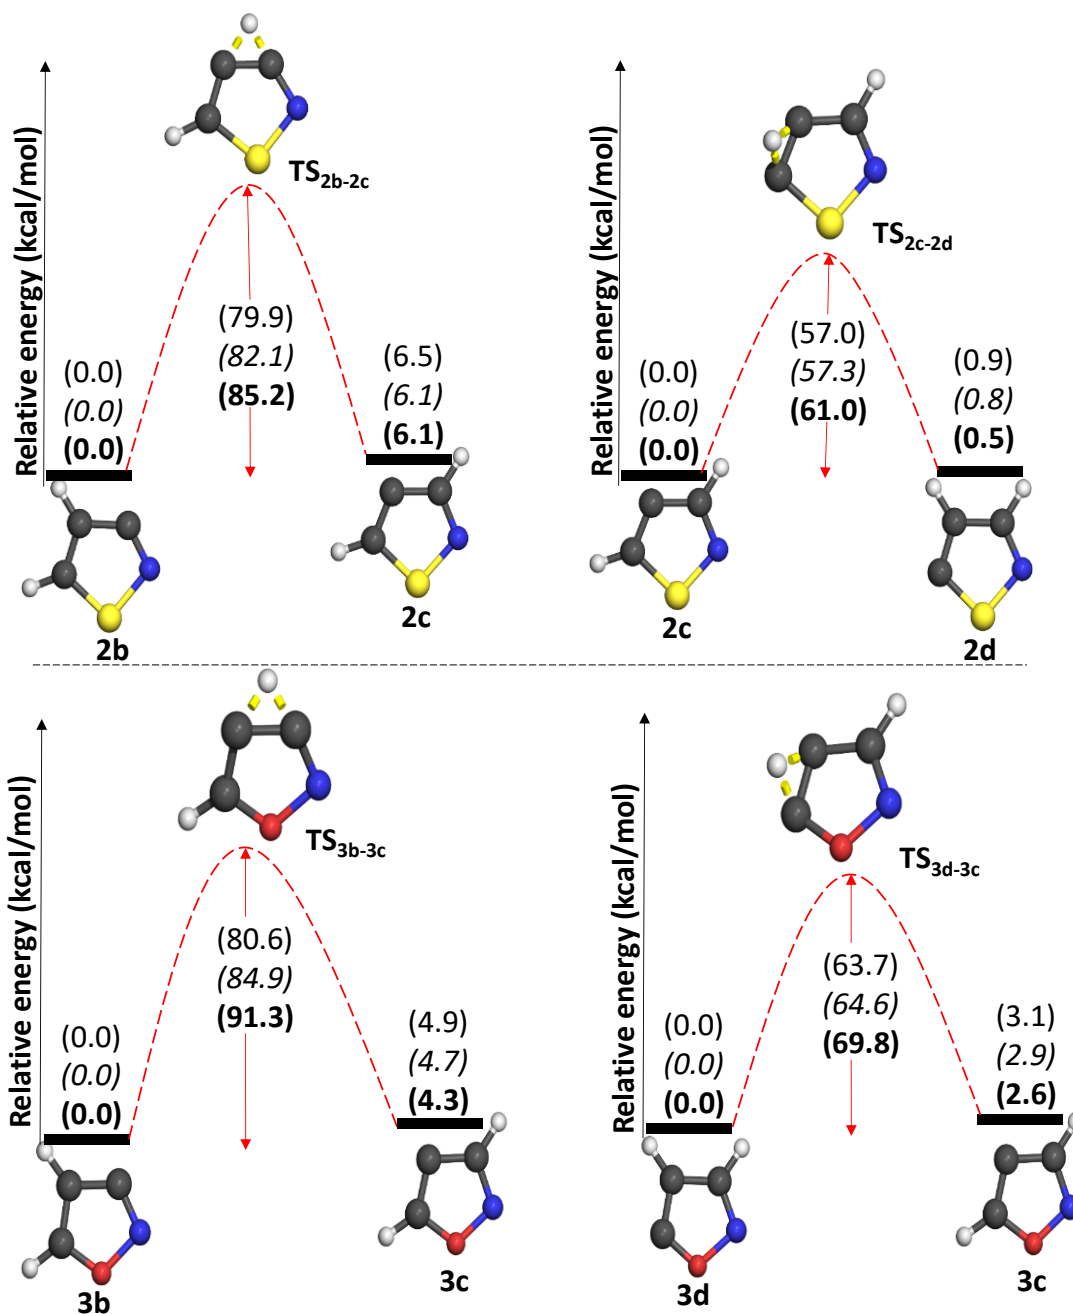

**Figure S3.** Isomerization pathways through 1,2-H shift in the dehydro- pyrazole (**1a-1d**), isothiazole (**2b-2d**) and isoxazole (**3b-3d**) radical isomers. (Normal font: B3LYP/cc-pVTZ, italics: M06-2X/cc-pVTZ, and bold: CCSD(T)/cc-pVTZ//B3LYP/cc-pVTZ).

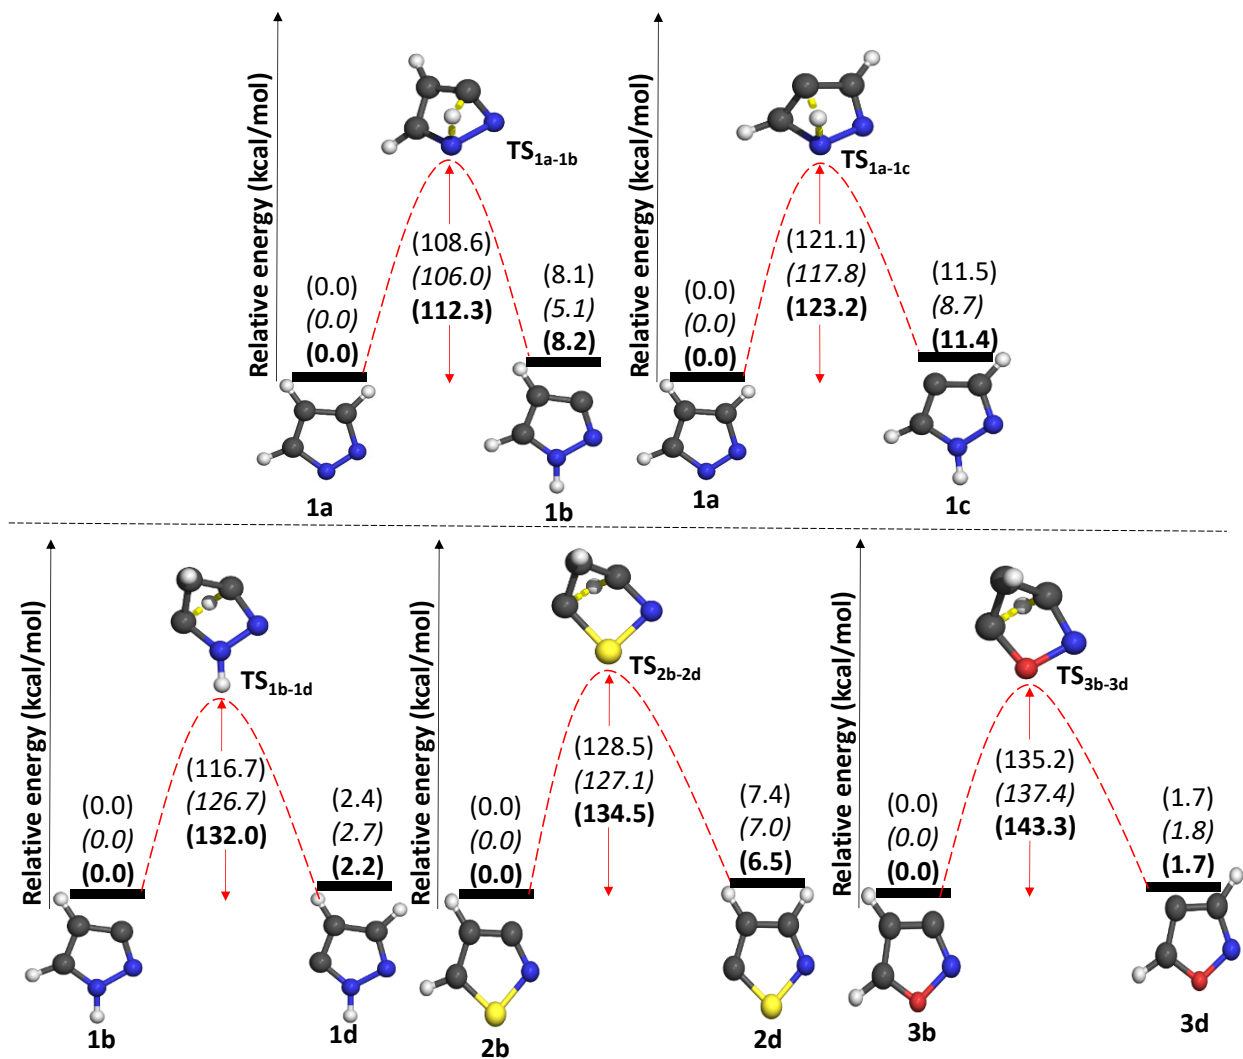

**Figure S4.** Isomerization pathways through 1,3-H shift in the dehydro-pyrazole (**1a-1d**), isothiazole (**2b-2d**) and isoxazole (**3b-3d**) radical isomers. (Normal font: B3LYP/cc-pVTZ, italics: M06-2X/cc-pVTZ, and bold: CCSD(T)/cc-pVTZ//B3LYP/cc-pVTZ).

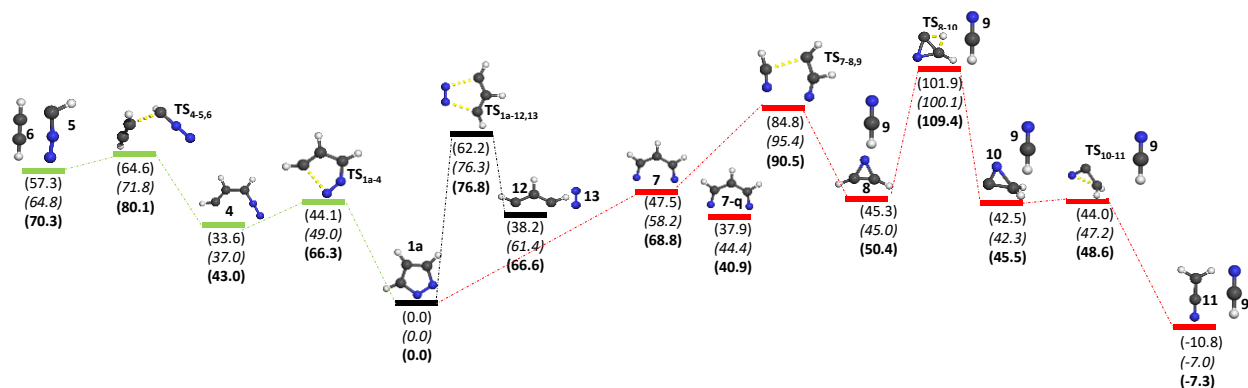

**Figure S5.** The unimolecular reaction pathways of **1a** depicting three possible ring-opening channels. (Normal font: B3LYP/cc-pVTZ, italics: M06-2X/cc-pVTZ, and bold: CCSD(T)/cc-pVTZ//B3LYP/cc-pVTZ)

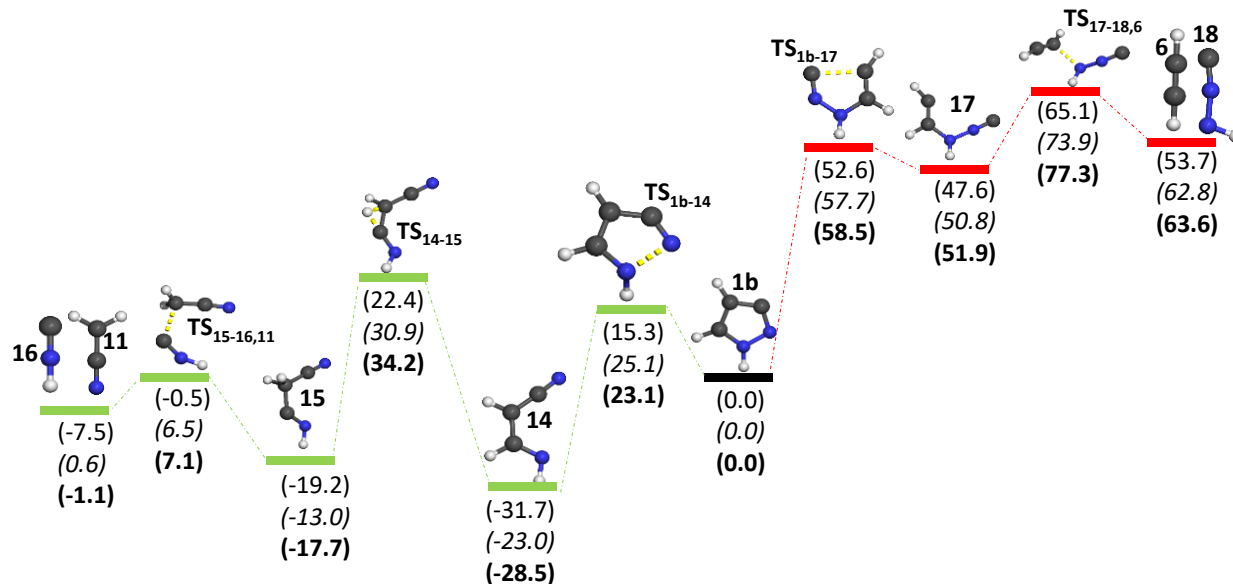

**Figure S6.** The unimolecular reaction pathways of **1b**. (Normal font: B3LYP/cc-pVTZ, italics: M06-2X/cc-pVTZ, and bold: CCSD(T)/cc-pVTZ//B3LYP/cc-pVTZ)

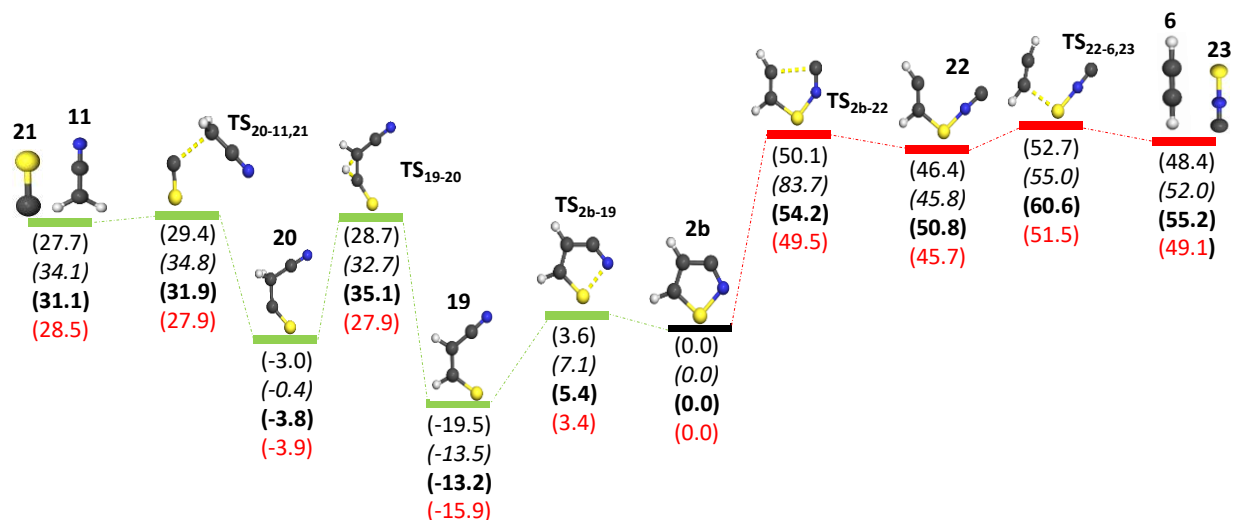

**Figure S7.** The unimolecular reaction pathways of **2b**. (Normal font: B3LYP/cc-pVTZ, italics: M06-2X/cc-pVTZ, and bold: CCSD(T)/cc-pVTZ//B3LYP/cc-pVTZ), red: B3LYP-GD3/cc-pVTZ.

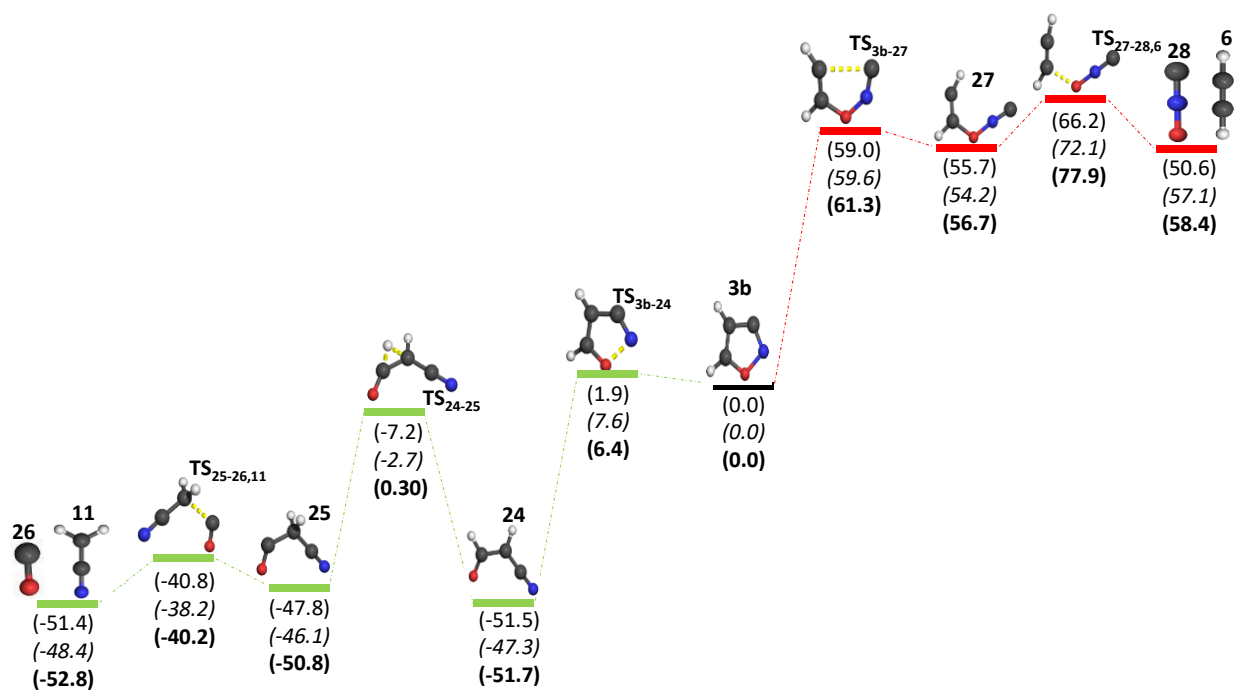

**Figure S8.** The unimolecular ring pathways of **3b**. (Normal font: B3LYP/cc-pVTZ, italics: M06-2X/cc-pVTZ, and bold: CCSD(T)/cc-pVTZ//B3LYP/cc-pVTZ).

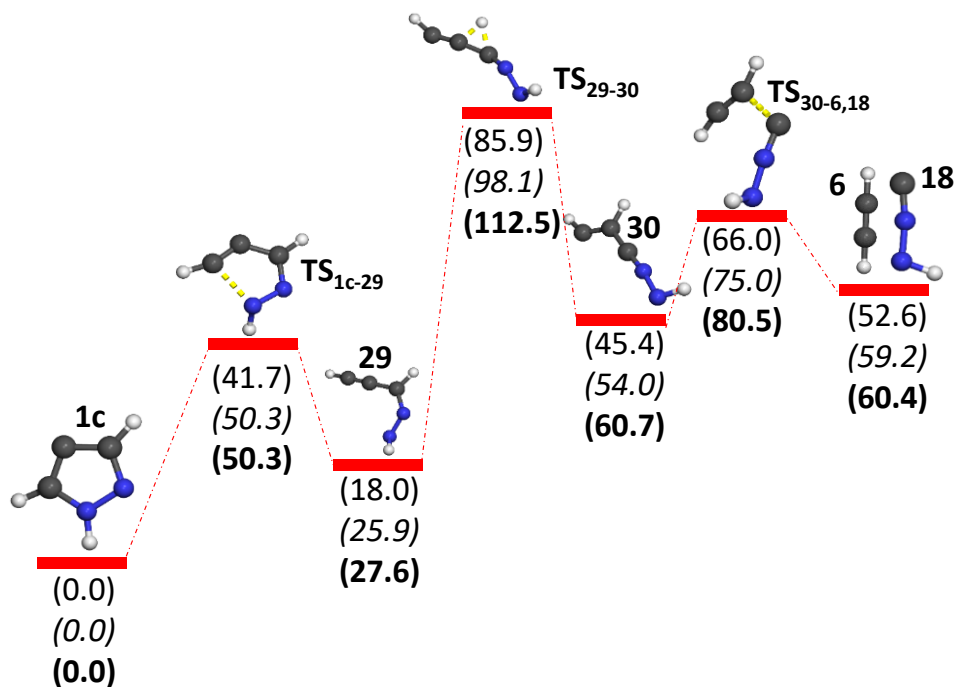

**Figure S9.** The unimolecular reaction pathways of **1c**. (Normal font: B3LYP/cc-pVTZ, italics: M06-2X/cc-pVTZ, and bold: CCSD(T)/cc-pVTZ//B3LYP/cc-pVTZ).

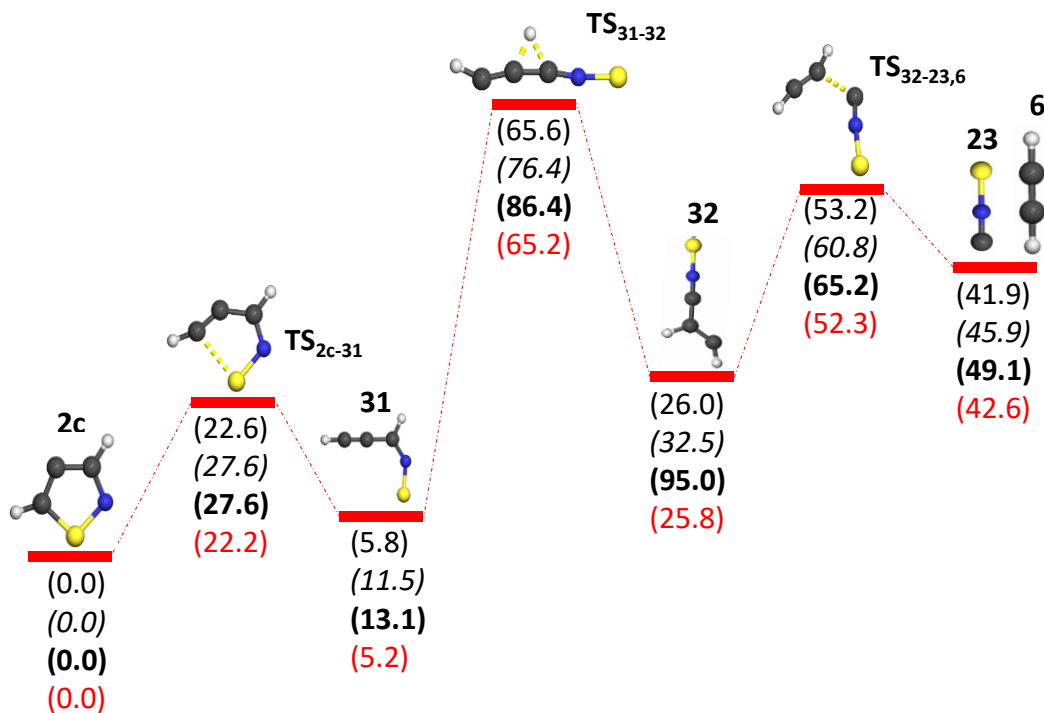

**Figure S10.** The unimolecular reaction pathways of **2c**. (Normal font: B3LYP/cc-pVTZ, italics: M06-2X/cc-pVTZ, and bold: CCSD(T)/cc-pVTZ//B3LYP/cc-pVTZ) red: B3LYP-GD3/cc-pVTZ.

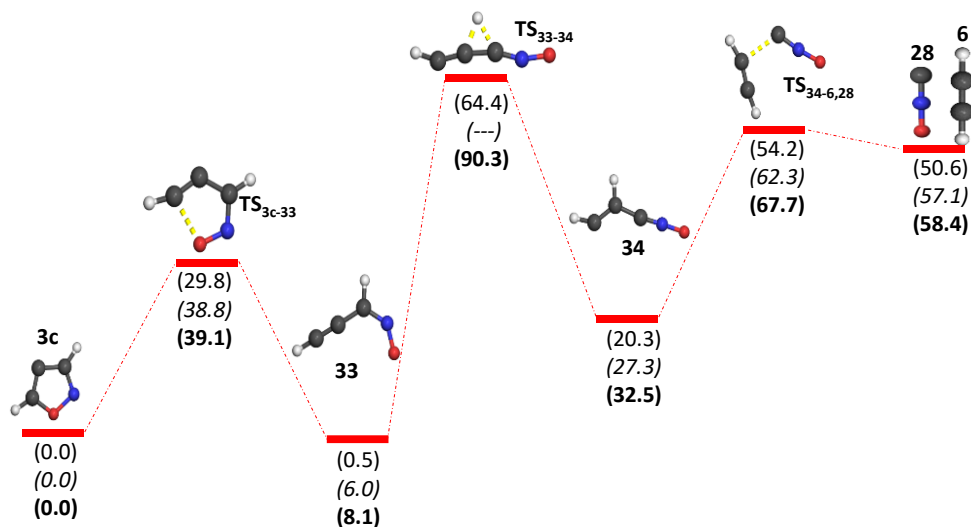

**Figure S11.** The unimolecular reaction pathways of **3c**. (Normal font: B3LYP/cc-pVTZ, italics: M06-2X/cc-pVTZ, and bold: CCSD(T)/cc-pVTZ//B3LYP/cc-pVTZ).

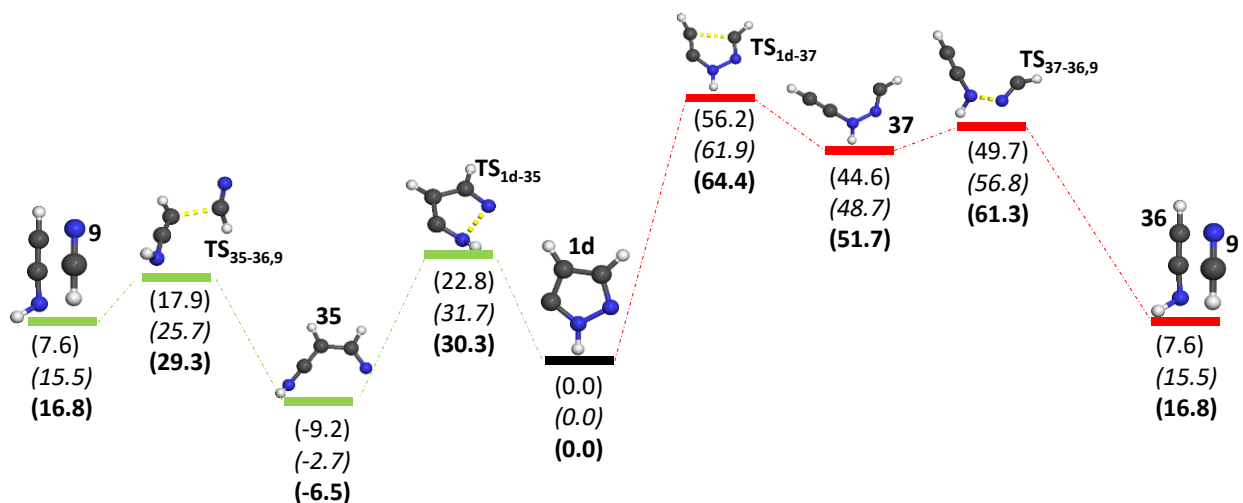

**Figure S12.** The unimolecular reaction pathways of **1d**. (Normal font: B3LYP/cc-pVTZ, italics: M06-2X/cc-pVTZ, and bold: CCSD(T)/cc-pVTZ//B3LYP/cc-pVTZ).

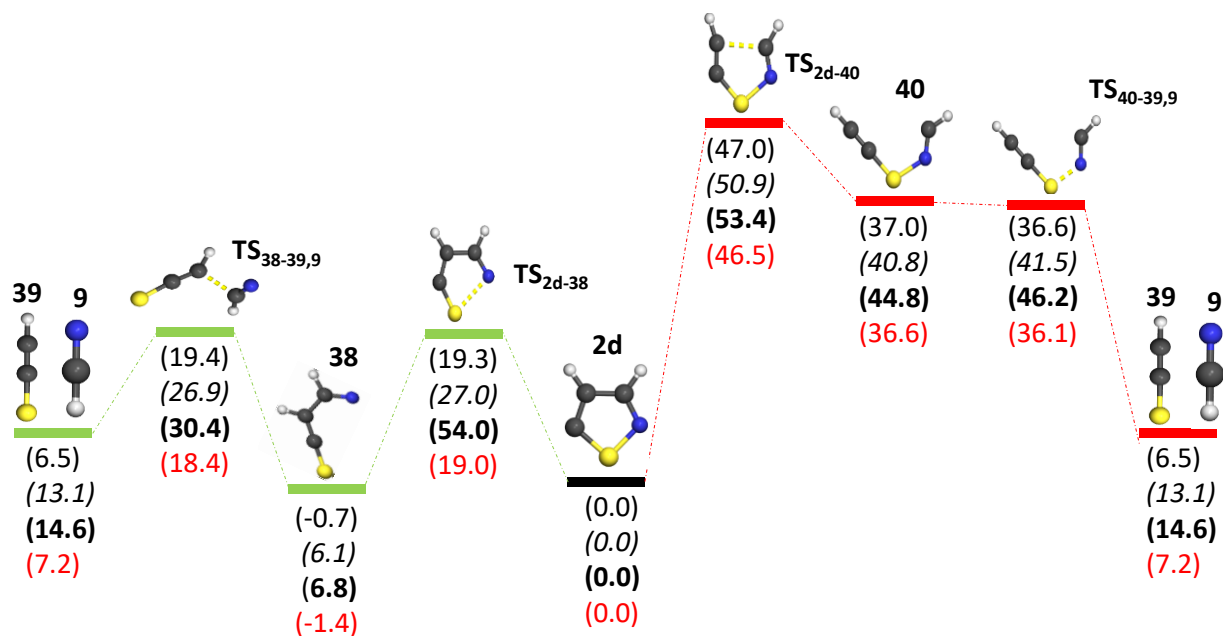

**Figure S13.** The unimolecular reaction pathways of **2d**. (Normal font: B3LYP/cc-pVTZ, italics: M06-2X/cc-pVTZ, and bold: CCSD(T)/cc-pVTZ//B3LYP/cc-pVTZ) red: B3LYP-GD3/cc-pVTZ.

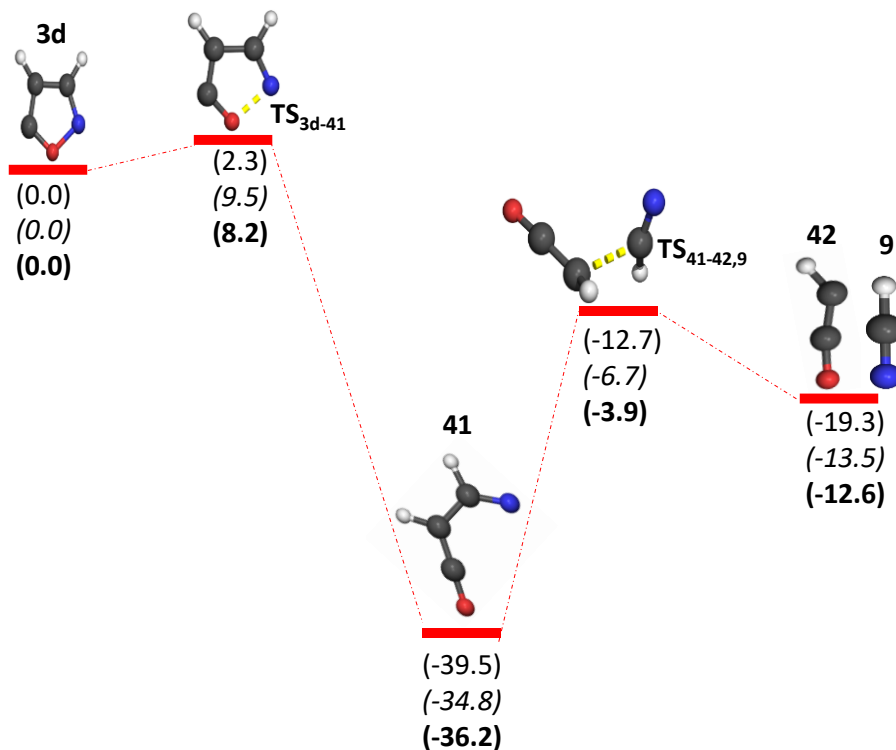

**Figure S14.** The unimolecular reaction pathways of **3d**. (Normal font: B3LYP/cc-pVTZ, italics: M06-2X/cc-pVTZ, and bold: CCSD(T)/cc-pVTZ//B3LYP/cc-pVTZ).

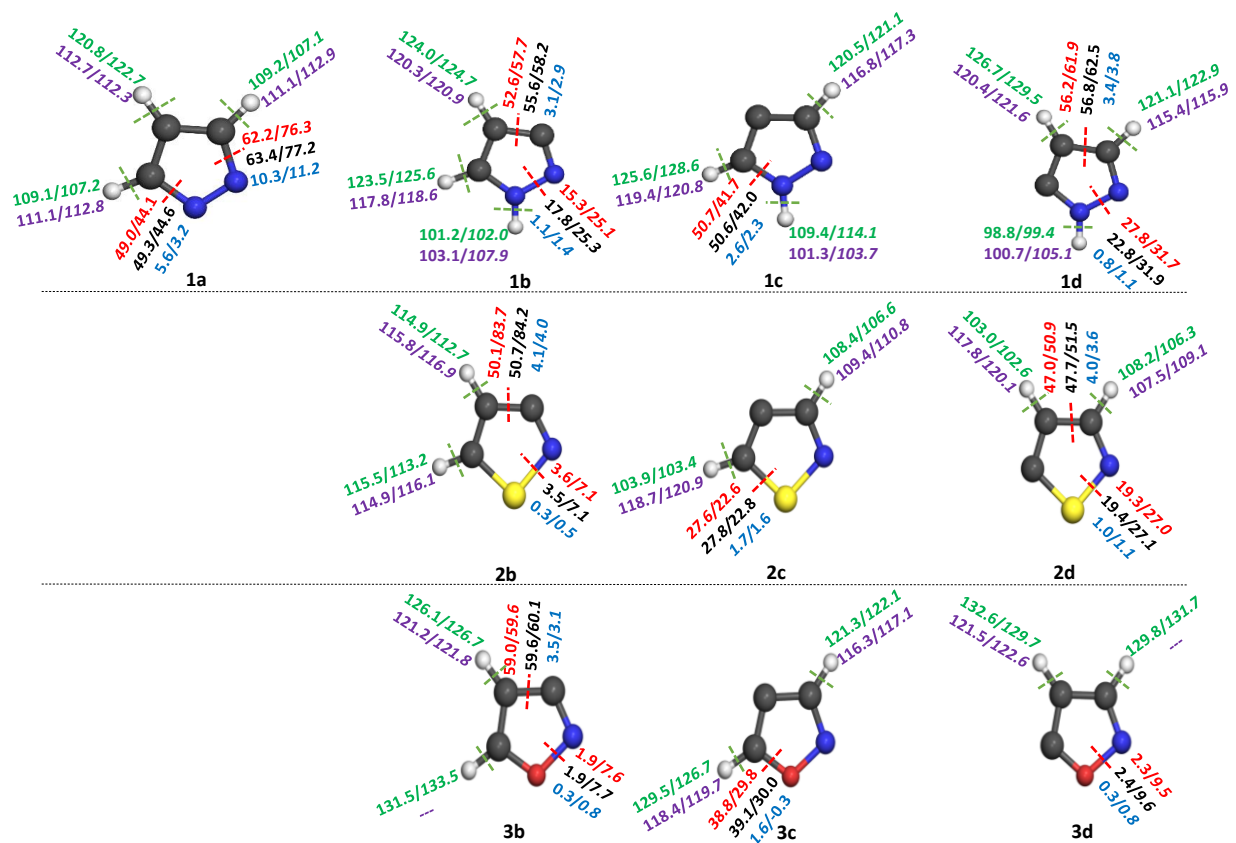

**Figure S15.** Summary of the unimolecular reaction pathways (energy values indicated in kcal/mol; (normal font = (U)B3LYP/cc-pVTZ; italics = (U)M06-2X/cc-pVTZ level of theory). {Colour codes: red-energy barriers, black-activation enthalpy, blue-activation entropy; all energies correspond to the first step of the unimolecular reaction pathways relative to their corresponding parent radical; the second bond dissociation energy (BDE) values derived from their parent heterocycle for all radicals are indicated; green-singlet and purple-triplet state (B3LYP/cc-pVTZ – normal font and M06-2X/cc-pVTZ – Italics)}.



Appendix 1S. Cartesian Coordinates at B3LYP/cc-pVTZ

|                                                                                                                                  |             |             |            |                                                                                                                                                    |             |             |             |
|----------------------------------------------------------------------------------------------------------------------------------|-------------|-------------|------------|----------------------------------------------------------------------------------------------------------------------------------------------------|-------------|-------------|-------------|
| 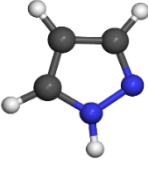 <p style="text-align: center;"><b>1</b></p>    |             |             |            |  <p style="text-align: center;"><b>1a</b></p>                   |             |             |             |
| C                                                                                                                                | 1.10783800  | 0.30640200  | 0.00000000 | C                                                                                                                                                  | 0.00000000  | 1.08465600  | 0.32791900  |
| C                                                                                                                                | 0.66232800  | -0.99581500 | 0.00000000 | C                                                                                                                                                  | 0.00000000  | 0.00000000  | 1.18470600  |
| C                                                                                                                                | -0.74303900 | -0.88948000 | 0.00000000 | C                                                                                                                                                  | 0.00000000  | -1.08465600 | 0.32791900  |
| N                                                                                                                                | 0.00000000  | 1.08466300  | 0.00000000 | N                                                                                                                                                  | 0.00000000  | 0.63608700  | -1.02762400 |
| H                                                                                                                                | -0.04807700 | 2.08773000  | 0.00000000 | H                                                                                                                                                  | 0.00000000  | 2.14148100  | 0.54182400  |
| H                                                                                                                                | -1.47522200 | -1.67992400 | 0.00000000 | H                                                                                                                                                  | 0.00000000  | -2.14148100 | 0.54182400  |
| N                                                                                                                                | -1.14284400 | 0.37629500  | 0.00000000 | N                                                                                                                                                  | 0.00000000  | -0.63608700 | -1.02762400 |
| H                                                                                                                                | 1.26223500  | -1.88801000 | 0.00000000 | H                                                                                                                                                  | 0.00000000  | 0.00000000  | 2.25982000  |
| H                                                                                                                                | 2.09821000  | 0.72686100  | 0.00000000 |                                                                                                                                                    |             |             |             |
|  <p style="text-align: center;"><b>1b</b></p>   |             |             |            |  <p style="text-align: center;"><b>1c</b></p>                   |             |             |             |
| C                                                                                                                                | 1.06994800  | 0.21093700  | 0.00000000 | C                                                                                                                                                  | 1.14693600  | 0.30429500  | 0.00000000  |
| C                                                                                                                                | 0.58132900  | -1.08102300 | 0.00000000 | C                                                                                                                                                  | 0.71955300  | -0.99666400 | 0.00000000  |
| C                                                                                                                                | -0.81048000 | -0.87596300 | 0.00000000 | C                                                                                                                                                  | -0.67758900 | -0.99010000 | 0.00000000  |
| N                                                                                                                                | 0.00000000  | 1.04315200  | 0.00000000 | N                                                                                                                                                  | 0.00000000  | 1.03113700  | 0.00000000  |
| H                                                                                                                                | -0.00808300 | 2.04768200  | 0.00000000 | H                                                                                                                                                  | -0.09991600 | 2.03118600  | 0.00000000  |
| N                                                                                                                                | -1.17904300 | 0.36290400  | 0.00000000 | H                                                                                                                                                  | 2.12381500  | 0.75274800  | 0.00000000  |
| H                                                                                                                                | 1.13706500  | -1.99937900 | 0.00000000 | H                                                                                                                                                  | -1.37813800 | -1.80623800 | 0.00000000  |
| H                                                                                                                                | 2.07953400  | 0.58560600  | 0.00000000 | N                                                                                                                                                  | -1.11130900 | 0.27130900  | 0.00000000  |
|  <p style="text-align: center;"><b>1d</b></p> |             |             |            |  <p style="text-align: center;"><b>TS<sub>1b-1c</sub></b></p> |             |             |             |
| C                                                                                                                                | 0.69946700  | 0.94902300  | 0.00000000 | C                                                                                                                                                  | 0.20056200  | -1.10866800 | -0.02243100 |
| C                                                                                                                                | 1.18673800  | -0.33150000 | 0.00000000 | C                                                                                                                                                  | -1.11202400 | -0.62160700 | 0.11404900  |
| C                                                                                                                                | 0.00000000  | -1.09983400 | 0.00000000 | C                                                                                                                                                  | -0.90527200 | 0.73742400  | 0.08136700  |
| N                                                                                                                                | -0.63635300 | 0.92743900  | 0.00000000 | N                                                                                                                                                  | 1.01717200  | -0.02947300 | -0.01470300 |
| H                                                                                                                                | -1.28286800 | 1.69489500  | 0.00000000 | H                                                                                                                                                  | 2.02950100  | -0.03353600 | 0.01884100  |
| H                                                                                                                                | -0.09517300 | -2.17355900 | 0.00000000 | N                                                                                                                                                  | 0.38442600  | 1.15304800  | -0.00274200 |
| N                                                                                                                                | -1.09913000 | -0.35156400 | 0.00000000 | H                                                                                                                                                  | -1.54518000 | 0.23207700  | -0.86931200 |
| H                                                                                                                                | 2.20919100  | -0.65859900 | 0.00000000 | H                                                                                                                                                  | 0.60490000  | -2.10646100 | -0.06532800 |

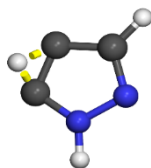

**TS<sub>1c-1d</sub>**

|   |             |             |             |
|---|-------------|-------------|-------------|
| C | 1.07857600  | -0.63123700 | -0.11308900 |
| C | -0.17804900 | -1.19140400 | -0.07587500 |
| C | -1.16577900 | -0.15263100 | -0.00436500 |
| N | 0.78599000  | 0.69880900  | 0.00920000  |
| H | 1.44007100  | 1.46212500  | 0.03818000  |
| H | 0.67360700  | -1.30746200 | 0.91634700  |
| H | -2.23973100 | -0.20841300 | 0.01550300  |
| N | -0.54062400 | 1.00196000  | 0.01793500  |

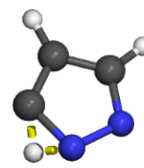

**TS<sub>1d-1a</sub>**

|   |             |             |             |
|---|-------------|-------------|-------------|
| C | -0.18376100 | -1.14160300 | -0.05294700 |
| C | 1.08298500  | -0.55824900 | -0.01443900 |
| C | 0.76833000  | 0.78972000  | 0.01235400  |
| N | -1.20901400 | -0.17452100 | -0.11175100 |
| H | -1.06372200 | -0.95638300 | 0.88316100  |
| H | 1.43654700  | 1.63651200  | 0.03978600  |
| N | -0.56485300 | 1.00707100  | 0.02586200  |
| H | 2.03892100  | -1.04719200 | 0.00846900  |

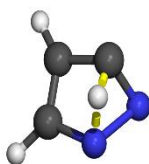

**TS<sub>1a-1b</sub>**

|   |             |             |             |
|---|-------------|-------------|-------------|
| C | 0.95284800  | 0.60857200  | -0.13753500 |
| C | 0.94780700  | -0.72861100 | -0.04921000 |
| C | -0.48973600 | -0.77765500 | 0.43861800  |
| N | -0.41604700 | 0.92627900  | 0.23358700  |
| H | 1.68908000  | 1.38140700  | -0.29808400 |
| H | -0.59181100 | 0.19836800  | 1.28748900  |
| N | -1.18740700 | -0.16595300 | -0.56022700 |
| H | 1.66140700  | -1.51588200 | -0.21416100 |

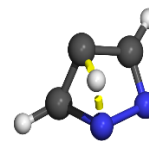

**TS<sub>1a-1c</sub>**

|   |             |             |             |
|---|-------------|-------------|-------------|
| C | -1.18777000 | 0.16546800  | -0.47257200 |
| C | -0.32641300 | 0.92350500  | 0.40284600  |
| C | 1.02316500  | 0.55155500  | -0.12097500 |
| N | -0.43758000 | -0.84714300 | 0.29506500  |
| H | -2.25064900 | 0.10148300  | -0.64744100 |
| H | 1.89018200  | 1.15853100  | -0.34082600 |
| N | 0.96975300  | -0.73261300 | -0.17669900 |
| H | -0.41863600 | -0.04488900 | 1.30390800  |

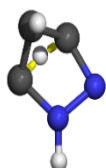

**TS<sub>1b-1d</sub>**

|   |             |             |             |
|---|-------------|-------------|-------------|
| C | 0.33653700  | -0.90480100 | 0.37428800  |
| C | 1.33701800  | -0.05571900 | -0.33835100 |
| C | 0.43441500  | 0.79619900  | 0.40018300  |
| N | -0.92658500 | -0.50923900 | -0.16839500 |
| H | -1.79813600 | -1.02849200 | -0.22999200 |
| N | -0.88065400 | 0.79671000  | -0.16805600 |
| H | 1.47344300  | -0.03749300 | -1.41023900 |
| H | 0.32754500  | 0.03961600  | 1.37866800  |

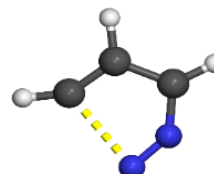

**TS<sub>1a-4</sub>**

|   |             |             |             |
|---|-------------|-------------|-------------|
| C | -1.14074200 | -0.91318000 | -0.01501700 |
| C | -1.12577400 | 0.40707100  | 0.00380800  |
| C | 0.13248200  | 1.11181300  | 0.00063800  |
| N | 1.21197000  | -0.92957300 | -0.00149100 |
| H | -1.70405400 | -1.82077700 | 0.05070600  |
| H | 0.31975500  | 2.16644100  | -0.01100700 |
| N | 1.10757600  | 0.22103100  | 0.00430000  |
| H | -2.04831700 | 0.97990700  | 0.00406700  |

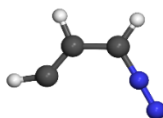

**4**

|   |             |             |            |
|---|-------------|-------------|------------|
| C | -1.53099500 | -1.02958800 | 0.00000000 |
| C | -1.29608100 | 0.26376500  | 0.00000000 |

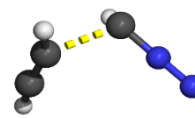

**TS<sub>4-5,6</sub>**

|   |             |             |             |
|---|-------------|-------------|-------------|
| C | -1.97707100 | -0.60017300 | -0.26691500 |
| C | -1.52511900 | 0.19477800  | 0.54006800  |

|                                                                                                                                                                                                                                                                                                                                                                                                                                               |                                                                                                                                                                                                                                                                                                                                                                                                                                                                   |                                                                                                                                                                                                                                                           |                                                                                                                                                                                                                                                                         |
|-----------------------------------------------------------------------------------------------------------------------------------------------------------------------------------------------------------------------------------------------------------------------------------------------------------------------------------------------------------------------------------------------------------------------------------------------|-------------------------------------------------------------------------------------------------------------------------------------------------------------------------------------------------------------------------------------------------------------------------------------------------------------------------------------------------------------------------------------------------------------------------------------------------------------------|-----------------------------------------------------------------------------------------------------------------------------------------------------------------------------------------------------------------------------------------------------------|-------------------------------------------------------------------------------------------------------------------------------------------------------------------------------------------------------------------------------------------------------------------------|
| <p>C 0.00000000 0.91395900 0.00000000<br/> N 1.97340700 -0.49246500 0.00000000<br/> H -2.40332900 -1.65765900 0.00000000<br/> H 0.15090800 1.97805300 0.00000000<br/> N 1.07704200 0.18336300 0.00000000<br/> H -2.13826500 0.95449600 0.00000000</p>                                                                                                                                                                                         | 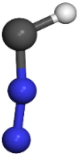 <p><b>5</b></p> <p>C -0.31466900 -1.16081500 0.00000000<br/> N 0.46695900 1.12140700 0.00000000<br/> H -1.38069900 -1.37394600 0.00000000<br/> N 0.00000000 0.06985500 0.00000000</p>                                                                                                                                                                                           | <p>C 0.30102500 0.95693500 -0.24971700<br/> N 2.03603200 -0.66543300 0.21091500<br/> H -2.19755100 -1.25020300 -1.07851200<br/> H 0.05161100 1.22577500 -1.26785400<br/> N 1.23210300 0.08814300 -0.10223300<br/> H -1.52401200 0.75621800 1.44497500</p> |  <p><b>6</b></p> <p>C 0.00000000 0.00000000 0.59791600<br/> H 0.00000000 0.00000000 1.65897000<br/> C 0.00000000 0.00000000 -0.59791600<br/> H 0.00000000 0.00000000 -1.65897000</p> |
|  <p><b>7</b></p> <p>C -1.28465900 0.29854300 -0.00020200<br/> C -0.00001500 0.94241100 0.00008900<br/> C 1.28454600 0.29861100 0.00007600<br/> N -1.52322100 -0.94276200 0.00023600<br/> H -2.15639100 0.96864900 -0.00077800<br/> H 2.15626500 0.96877900 0.00025600<br/> N 1.52336200 -0.94269400 -0.00017400<br/> H -0.00009600 2.02337200 0.00031600</p> |  <p><b>TS<sub>7-8,9</sub></b></p> <p>C -1.62444000 0.48329100 -0.02355900<br/> C 0.80968300 1.25590200 -0.04030400<br/> C 1.20578600 -0.07941600 -0.01047700<br/> N -1.55235500 -0.66871400 0.03858700<br/> H -1.88060800 1.51442000 -0.08603900<br/> H 2.30743100 0.11862500 -0.09098700<br/> N 0.94796600 -1.27942000 0.00142300<br/> H 1.45772500 2.04523400 0.34298900</p> |                                                                                                                                                                                                                                                           |                                                                                                                                                                                                                                                                         |
|  <p><b>8</b></p> <p>C 0.65723100 -0.36951600 -0.00002400<br/> C -0.63021900 -0.40582600 0.00005900<br/> H -1.59441100 -0.87716000 -0.00017800<br/> N -0.03111200 0.90068400 -0.00000800<br/> H 1.65012500 -0.77558300 0.00002000</p>                                                                                                                       |  <p><b>9</b></p> <p>C 0.00000000 0.00000000 -0.49704000<br/> N 0.00000000 0.00000000 0.64922600<br/> H 0.00000000 0.00000000 -1.56234300</p>                                                                                                                                                                                                                                 |                                                                                                                                                                                                                                                           |                                                                                                                                                                                                                                                                         |
|  <p><b>TS<sub>8-10</sub></b></p> <p>C 0.66642000 -0.17474500 -0.05010000<br/> C -0.33225800 0.82244100 -0.10510100<br/> H 0.74928800 0.88746300 0.69038900<br/> N -0.63019100 -0.59857000 0.05780700<br/> H 1.65707900 -0.58365500 -0.16383600</p>                                                                                                         |  <p><b>10</b></p> <p>C -0.68588500 0.50251600 0.00000000<br/> C 0.00000000 -0.82349700 0.00000000<br/> N 0.88128100 0.00804900 0.00000000<br/> H -1.02682700 0.93477200 0.92891200<br/> H -1.02682700 0.93477200 -0.92891200</p>                                                                                                                                             |                                                                                                                                                                                                                                                           |                                                                                                                                                                                                                                                                         |

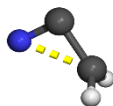

**TS<sub>10-11</sub>**

|   |             |             |             |
|---|-------------|-------------|-------------|
| C | 0.83977700  | -0.51524100 | 0.00000000  |
| C | 0.00000000  | 0.72126900  | 0.00000000  |
| N | -1.01987400 | 0.10957600  | 0.00000000  |
| H | 1.05022800  | -1.00159900 | 0.93764500  |
| H | 1.05022800  | -1.00159900 | -0.93764500 |

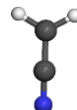

**11**

|   |            |             |             |
|---|------------|-------------|-------------|
| C | 0.00000000 | 0.00000000  | 0.18699400  |
| N | 0.00000000 | 0.00000000  | 1.35340400  |
| C | 0.00000000 | 0.00000000  | -1.18896100 |
| H | 0.00000000 | 0.93327800  | -1.73101500 |
| H | 0.00000000 | -0.93327800 | -1.73101500 |

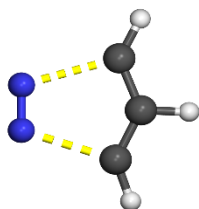

**TS<sub>1a-12,13</sub>**

|   |             |             |             |
|---|-------------|-------------|-------------|
| C | 0.75561500  | 1.23833200  | 0.00014500  |
| C | 1.24867700  | -0.03634500 | 0.00002700  |
| C | 0.67307900  | -1.24462600 | -0.00016800 |
| N | -1.47280600 | 0.58337800  | 0.00004900  |
| H | 1.23188900  | 2.20639600  | -0.00074500 |
| H | 1.01494300  | -2.26586000 | 0.00043800  |
| N | -1.47804500 | -0.52752900 | -0.00003500 |
| H | 2.34490500  | -0.07564900 | 0.00018600  |

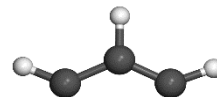

**12**

|   |             |             |             |
|---|-------------|-------------|-------------|
| C | 1.17078300  | -0.37558600 | -0.05347600 |
| C | -0.00413100 | 0.42080700  | -0.08392200 |
| C | -1.12466200 | -0.29695900 | -0.00681100 |
| H | 1.93994800  | 0.17272300  | 0.51965000  |
| H | -2.14884700 | -0.17448900 | 0.31608200  |
| H | -0.04304300 | 1.51218900  | 0.02952200  |

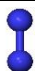

**13**

|   |            |            |             |
|---|------------|------------|-------------|
| N | 0.00000000 | 0.00000000 | 0.54569200  |
| N | 0.00000000 | 0.00000000 | -0.54569200 |

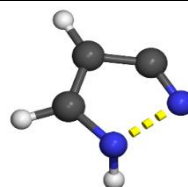

**TS<sub>1b-14</sub>**

|   |             |             |             |
|---|-------------|-------------|-------------|
| C | -1.11589100 | -0.09312100 | -0.02308200 |
| C | -0.48360100 | 1.11024000  | -0.00139800 |
| C | 0.90269100  | 0.76448900  | -0.01099100 |
| N | -0.29662100 | -1.17876000 | 0.13895400  |
| H | -0.34643000 | -1.91657200 | -0.56104200 |
| N | 1.38684600  | -0.33766300 | -0.01880300 |
| H | -0.91879100 | 2.09154500  | 0.02430000  |
| H | -2.18554100 | -0.24965900 | -0.09148700 |

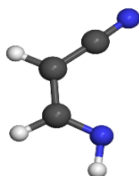

**14**

|   |             |             |             |
|---|-------------|-------------|-------------|
| C | 1.27660100  | 0.37581100  | 0.00002600  |
| C | -0.04750600 | 0.88855900  | -0.00011600 |
| C | -1.18878600 | 0.08027400  | -0.00023200 |
| N | 1.50770600  | -0.89747600 | -0.00012900 |

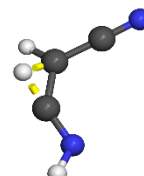

**TS<sub>14-15</sub>**

|   |             |             |             |
|---|-------------|-------------|-------------|
| C | 1.23553700  | 0.34954100  | -0.01137100 |
| C | -0.08697900 | 0.86060500  | 0.07617000  |
| C | -1.25263700 | 0.04143200  | 0.04351900  |
| N | 1.81498400  | -0.74691000 | 0.11111000  |

|                                                                                                                                  |             |             |             |                                                                                                                                                      |             |             |             |
|----------------------------------------------------------------------------------------------------------------------------------|-------------|-------------|-------------|------------------------------------------------------------------------------------------------------------------------------------------------------|-------------|-------------|-------------|
| H                                                                                                                                | 2.50973600  | -1.08301600 | 0.00053900  | H                                                                                                                                                    | 2.68904600  | -0.88486000 | -0.38571700 |
| N                                                                                                                                | -2.16709100 | -0.54109500 | 0.00020300  | N                                                                                                                                                    | -2.18881600 | -0.62634400 | -0.05855500 |
| H                                                                                                                                | -0.20535400 | 1.95864100  | 0.00027200  | H                                                                                                                                                    | -0.19980600 | 1.89712000  | 0.36255100  |
| H                                                                                                                                | 2.06946000  | 1.12651400  | 0.00060400  | H                                                                                                                                                    | 0.75205600  | 1.09105400  | -0.99463300 |
| 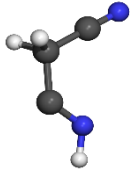 <p style="text-align: center;"><b>15</b></p>   |             |             |             |  <p style="text-align: center;"><b>TS<sub>15-16,11</sub></b></p>  |             |             |             |
| C                                                                                                                                | 1.32990500  | 0.29522800  | 0.00000000  | C                                                                                                                                                    | 0.48038000  | -1.53940900 | 0.00000000  |
| C                                                                                                                                | 0.00000000  | 0.99490800  | 0.00000000  | C                                                                                                                                                    | 1.18708700  | 0.49106000  | 0.00000000  |
| C                                                                                                                                | -1.16459400 | 0.10856600  | 0.00000000  | C                                                                                                                                                    | 0.00000000  | 1.23323700  | 0.00000000  |
| N                                                                                                                                | 1.58228400  | -0.90550300 | 0.00000000  | N                                                                                                                                                    | -0.66151900 | -1.81562800 | 0.00000000  |
| H                                                                                                                                | 2.55210200  | -1.21267600 | 0.00000000  | H                                                                                                                                                    | -1.63543600 | -1.57665800 | 0.00000000  |
| N                                                                                                                                | -2.07636400 | -0.59164500 | 0.00000000  | N                                                                                                                                                    | -1.03514300 | 1.75654500  | 0.00000000  |
| H                                                                                                                                | -0.04270700 | 1.65024900  | 0.87253700  | H                                                                                                                                                    | 1.75363300  | 0.44045400  | 0.91784400  |
| H                                                                                                                                | -0.04270700 | 1.65024900  | -0.87253700 | H                                                                                                                                                    | 1.75363300  | 0.44045400  | -0.91784400 |
|  <p style="text-align: center;"><b>16</b></p>   |             |             |             |  <p style="text-align: center;"><b>TS<sub>1b-17</sub></b></p>     |             |             |             |
| C                                                                                                                                | 0.00000000  | 0.00000000  | -0.73526700 | C                                                                                                                                                    | 1.09091500  | 0.39412500  | -0.00482500 |
| N                                                                                                                                | 0.00000000  | 0.00000000  | 0.42676500  | C                                                                                                                                                    | 1.18650800  | -0.91272400 | -0.01667700 |
| H                                                                                                                                | 0.00000000  | 0.00000000  | 1.42424800  | C                                                                                                                                                    | -1.28182600 | -1.04760400 | 0.00217100  |
|                                                                                                                                  |             |             |             | N                                                                                                                                                    | -0.16512000 | 1.02093500  | 0.09890100  |
|                                                                                                                                  |             |             |             | H                                                                                                                                                    | -0.31475700 | 1.88922600  | -0.39177500 |
|                                                                                                                                  |             |             |             | N                                                                                                                                                    | -1.19028700 | 0.14330900  | -0.02353700 |
|                                                                                                                                  |             |             |             | H                                                                                                                                                    | 1.89366100  | -1.71689900 | -0.00428300 |
|                                                                                                                                  |             |             |             | H                                                                                                                                                    | 1.93537300  | 1.07518200  | -0.01550100 |
|  <p style="text-align: center;"><b>17</b></p> |             |             |             |  <p style="text-align: center;"><b>TS<sub>17-18,6</sub></b></p> |             |             |             |
| C                                                                                                                                | 1.20676200  | 0.33821800  | 0.01070800  | C                                                                                                                                                    | 1.33106600  | -0.08185100 | -0.58167100 |
| C                                                                                                                                | 1.46396400  | -0.94197800 | 0.00772300  | C                                                                                                                                                    | 2.07966500  | -0.39380900 | 0.34141500  |
| C                                                                                                                                | -1.96440700 | -0.73514400 | 0.02109100  | C                                                                                                                                                    | -2.19662000 | -0.70032400 | 0.01299800  |
| N                                                                                                                                | -0.08164600 | 0.90918600  | -0.10835500 | N                                                                                                                                                    | -0.27618500 | 0.89017800  | 0.00780100  |
| H                                                                                                                                | -0.23550800 | 1.73730200  | 0.45072600  | H                                                                                                                                                    | 0.00759500  | 1.13304500  | 0.95995900  |
| N                                                                                                                                | -1.10817700 | 0.05618300  | 0.00001000  | N                                                                                                                                                    | -1.28978500 | 0.04705100  | 0.10011100  |
| H                                                                                                                                | 2.34278000  | -1.55781300 | 0.02104600  | H                                                                                                                                                    | 2.56403500  | -0.56237300 | 1.27329000  |
| H                                                                                                                                | 1.98356900  | 1.09636000  | 0.04951300  | H                                                                                                                                                    | 1.10549600  | -0.07536200 | -1.62508100 |

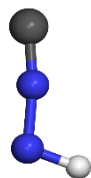

**18**

|   |             |             |             |
|---|-------------|-------------|-------------|
| C | 1.35201200  | 0.01486900  | 0.00009400  |
| N | -1.11123100 | -0.13952100 | 0.00006000  |
| H | -1.51909000 | 0.80322200  | 0.00007800  |
| N | 0.16937600  | 0.01203000  | -0.00015200 |

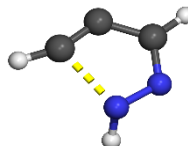

**TS<sub>1c-29</sub>**

|   |             |             |             |
|---|-------------|-------------|-------------|
| C | 1.44104200  | -0.31649700 | 0.00209200  |
| C | 0.92383900  | 0.81314800  | 0.03189100  |
| C | -0.49422100 | 1.04424400  | -0.00258600 |
| N | -0.47808000 | -1.13814600 | -0.12909800 |
| H | -0.77553900 | -1.84734600 | 0.54798000  |
| H | 2.18940800  | -1.07696000 | 0.00076100  |
| H | -0.98887300 | 1.99956000  | -0.06946300 |
| N | -1.18605600 | -0.05051400 | 0.03371800  |

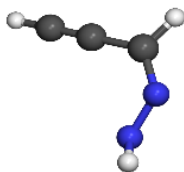

**29**

|   |             |             |             |
|---|-------------|-------------|-------------|
| C | -2.16255500 | 0.46726000  | -0.02233200 |
| C | -1.12744400 | -0.14654400 | 0.00564700  |
| C | 0.07326500  | -0.88855500 | 0.02579200  |
| N | 1.59138800  | 0.84354800  | 0.12778500  |
| H | 2.36601200  | 1.07202000  | -0.50286900 |
| H | -3.07103500 | 1.01562900  | -0.03786300 |
| H | 0.02319400  | -1.96793900 | 0.07819700  |
| N | 1.26321700  | -0.37393000 | -0.06951500 |

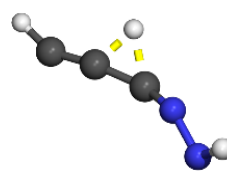

**TS<sub>29-30</sub>**

|   |             |             |             |
|---|-------------|-------------|-------------|
| C | -2.49818400 | -0.32103200 | 0.03423600  |
| C | -1.29676500 | 0.03969000  | -0.01301700 |
| C | 0.00462300  | 0.30207600  | -0.30779000 |
| N | 2.28181000  | -0.35394500 | -0.05230200 |
| H | 2.93462500  | 0.04812100  | 0.62904500  |
| H | -3.50234500 | -0.16334300 | 0.35658700  |
| H | -0.82174700 | 1.23205700  | 0.31363300  |
| N | 1.16553600  | 0.17662600  | 0.11232500  |

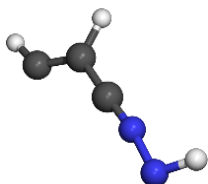

**30**

|   |             |             |             |
|---|-------------|-------------|-------------|
| C | 2.33002800  | -0.51701700 | -0.00000500 |
| C | 1.39661100  | 0.41185800  | 0.00002300  |
| C | 0.00355400  | 0.16877600  | -0.00011600 |
| N | -2.35988800 | -0.29364900 | 0.00004600  |
| H | -2.91218500 | 0.56236400  | 0.00010500  |
| H | 3.40585200  | -0.50568900 | 0.00017400  |
| N | -1.14745700 | 0.02170200  | -0.00001900 |
| H | 1.67658800  | 1.46525400  | 0.00011800  |

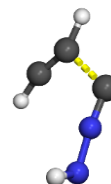

**TS<sub>30-6,18</sub>**

|   |             |             |             |
|---|-------------|-------------|-------------|
| C | -1.81817600 | -0.87736600 | -0.02342300 |
| C | -1.74159000 | 0.34565700  | 0.07590600  |
| C | 0.14566900  | 1.02821900  | -0.10083800 |
| N | 2.05447500  | -0.51324500 | -0.08536600 |
| H | 2.45585700  | -0.61650600 | 0.85265500  |
| H | -1.54924600 | -1.89859700 | -0.15658100 |
| N | 1.06112800  | 0.26367700  | -0.00241000 |
| H | -2.23124800 | 1.28302000  | 0.20849700  |

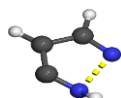

**TS<sub>1d-35</sub>**

|   |             |             |             |
|---|-------------|-------------|-------------|
| C | -0.80663200 | -0.81597700 | -0.03557900 |
| C | 0.51371000  | -1.09302000 | -0.01142300 |

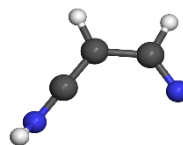

**35**

|   |             |            |             |
|---|-------------|------------|-------------|
| C | 1.03510400  | 0.18611000 | -0.01104000 |
| C | -0.09556600 | 0.86468300 | -0.02077300 |

|                                                                                                                                                                                                                                                                                                                                                                                                                                                                            |                                                                                                                                                                                                                                                                                                                                                                                                                                                       |
|----------------------------------------------------------------------------------------------------------------------------------------------------------------------------------------------------------------------------------------------------------------------------------------------------------------------------------------------------------------------------------------------------------------------------------------------------------------------------|-------------------------------------------------------------------------------------------------------------------------------------------------------------------------------------------------------------------------------------------------------------------------------------------------------------------------------------------------------------------------------------------------------------------------------------------------------|
| <p>C 1.13502700 0.21463800 -0.00767800<br/> N -1.32066900 0.31581500 0.13009800<br/> H -1.88019400 0.77559900 -0.58057400<br/> H 2.21334600 0.35627300 0.00841900<br/> N 0.40713700 1.26694400 -0.00435200<br/> H 1.00894600 -2.04502700 0.02001600</p>                                                                                                                                                                                                                    | <p>C -1.42220000 0.23769300 0.00731200<br/> N 2.06995000 -0.42286900 0.13066400<br/> H 2.56110600 -0.76691300 -0.69082500<br/> H -2.26347800 0.94345000 0.04420100<br/> N -1.69339000 -0.98434000 -0.00781200<br/> H -0.03758200 1.94300800 -0.06633400</p>                                                                                                                                                                                           |
| <p>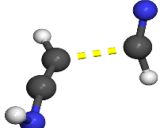<br/> <b>TS<sub>35-36,9</sub></b></p> <p>C -1.20609300 0.23467600 0.06142500<br/> C -0.15876900 0.94804400 -0.03460800<br/> C 1.53236000 -0.26196500 -0.46600900<br/> N -2.17922800 -0.52264200 -0.06121700<br/> H -2.54215300 -0.92031100 0.80253600<br/> H 1.29528500 -0.44669400 -1.49365200<br/> N 2.17702600 -0.34196400 0.50386900<br/> H 0.25729300 1.89471600 0.22771100</p>   | <p><br/> <b>36</b></p> <p>C 0.04009900 0.00721100 -0.00079100<br/> C 1.27759400 0.01058700 0.00002500<br/> N -1.21743500 -0.13012600 0.00036900<br/> H -1.72119100 0.75674300 0.00038500<br/> H 2.33708100 0.04735200 0.00162600</p>                                                                                                                               |
| <p><br/> <b>TS<sub>1d-37</sub></b></p> <p>C 1.00564200 0.56653200 0.00492100<br/> C 1.50970300 -0.56223400 0.02042100<br/> C -0.83070100 -1.09326300 0.00500000<br/> N -0.25332800 1.05288400 -0.06964300<br/> H -0.52269100 1.95747200 0.27231200<br/> H -1.38568900 -2.01936200 -0.00444600<br/> N -1.23757100 0.08018500 0.01073700<br/> H 2.23680300 -1.33579900 -0.03757600</p>      | <p><br/> <b>37</b></p> <p>C -1.06301700 0.14972500 -0.00889100<br/> C -2.06667200 -0.50932300 0.01821700<br/> C 1.56096700 -0.90405900 -0.02734300<br/> N 0.06918600 0.86598900 -0.07527400<br/> H 0.05834000 1.83095900 0.20486100<br/> H 2.54128000 -1.36139700 0.04632700<br/> N 1.32639700 0.30506300 0.04892700<br/> H -2.95637300 -1.08498000 0.04134600</p> |
| <p><br/> <b>TS<sub>37-36,9</sub></b></p> <p>C -1.11019100 0.17756900 -0.02617600<br/> C -2.01345500 -0.61810700 0.05893400<br/> C 1.63718000 -0.84394000 -0.12493900<br/> N -0.06476400 0.98044200 -0.21146300<br/> H -0.04972600 1.78073400 0.41039100<br/> H 2.41829600 -1.57763300 -0.04730100<br/> N 1.40520900 0.27535500 0.22029500<br/> H -2.83289200 -1.28681500 0.12817400</p> | <p><br/> <b>2</b></p> <p>C -0.75971600 -1.15795300 0.00000000<br/> C 0.65445800 -1.27577800 0.00000000<br/> C 1.23303300 -0.03834000 0.00000000<br/> S 0.00000000 1.15058300 0.00000000<br/> H -1.44753900 -1.99395500 0.00000000<br/> H 1.19508400 -2.20946200 0.00000000<br/> H 2.28090400 0.21274500 0.00000000<br/> N -1.25644200 0.05910900 0.00000000</p>  |

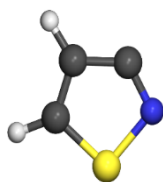

**2b**

|   |             |             |            |
|---|-------------|-------------|------------|
| C | -0.81145300 | -1.14981800 | 0.00000000 |
| C | 0.59403100  | -1.35459700 | 0.00000000 |
| C | 1.19054700  | -0.12595700 | 0.00000000 |
| S | 0.00000000  | 1.12040500  | 0.00000000 |
| H | 1.09819300  | -2.30578400 | 0.00000000 |
| H | 2.24471600  | 0.10217300  | 0.00000000 |
| N | -1.31166500 | 0.00848200  | 0.00000000 |

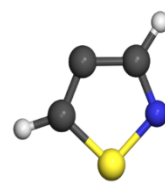

**2c**

|   |             |             |            |
|---|-------------|-------------|------------|
| C | -0.71166100 | -1.24740900 | 0.00000000 |
| C | 0.69726900  | -1.26767600 | 0.00000000 |
| C | 1.28860000  | -0.05633400 | 0.00000000 |
| S | 0.00000000  | 1.09830000  | 0.00000000 |
| H | -1.36596900 | -2.10683800 | 0.00000000 |
| H | 2.32950600  | 0.21824200  | 0.00000000 |
| N | -1.22982700 | -0.03652800 | 0.00000000 |

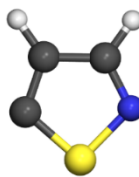

**2d**

|   |             |             |            |
|---|-------------|-------------|------------|
| C | -0.63933500 | -1.19520800 | 0.00000000 |
| C | 0.78165900  | -1.25449100 | 0.00000000 |
| C | 1.24181700  | 0.02307300  | 0.00000000 |
| S | 0.00000000  | 1.17383200  | 0.00000000 |
| H | -1.29119800 | -2.05965700 | 0.00000000 |
| H | 1.37861000  | -2.15199600 | 0.00000000 |
| N | -1.19889400 | -0.00141300 | 0.00000000 |

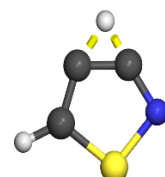

**TS<sub>2b-2c</sub>**

|   |             |             |             |
|---|-------------|-------------|-------------|
| C | 1.14423400  | -0.72415900 | -0.06501500 |
| C | 1.34035000  | 0.61079200  | -0.10213300 |
| C | 0.12267200  | 1.24827900  | 0.03304100  |
| S | -1.09429300 | 0.01476900  | -0.00401000 |
| H | 2.22042100  | -0.25599600 | 0.53848000  |
| H | -0.13738500 | 2.29183600  | 0.11470600  |
| N | -0.03112700 | -1.29737200 | 0.03080400  |

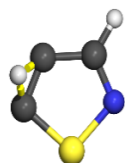

**TS<sub>2c-2d</sub>**

|   |             |             |             |
|---|-------------|-------------|-------------|
| C | -1.32773300 | 0.49006400  | -0.00066400 |
| C | -1.07249100 | -0.93926200 | -0.07346700 |
| C | 0.22186800  | -1.31631400 | -0.11711300 |
| S | 1.10525500  | 0.17288700  | 0.01235000  |
| H | -2.30228300 | 0.95620200  | 0.01791900  |
| H | -0.55009400 | -1.62632300 | 0.88711600  |
| N | -0.25165400 | 1.21385600  | 0.00640400  |

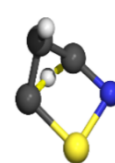

**TS<sub>2b-2d</sub>**

|   |             |             |             |
|---|-------------|-------------|-------------|
| C | 0.53480800  | -0.95553200 | 0.36108300  |
| C | 1.62345200  | -0.22823900 | -0.33161000 |
| C | 0.80129200  | 0.70565800  | 0.35351500  |
| N | -0.41064100 | 1.18679800  | -0.11027400 |
| H | 1.81236200  | -0.27354000 | -1.39504600 |
| H | 0.67658500  | 0.11105100  | 1.38511000  |
| S | -1.08573600 | -0.32977600 | -0.09475500 |

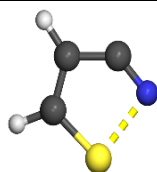

**TS<sub>2b-19</sub>**

|   |            |             |            |
|---|------------|-------------|------------|
| C | 1.24084300 | -0.67757800 | 0.00000000 |
| C | 1.28882400 | 0.74027300  | 0.00000000 |
| C | 0.00000000 | 1.17852400  | 0.00000000 |

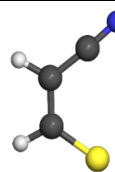

**19**

|   |             |            |            |
|---|-------------|------------|------------|
| C | 0.00000000  | 1.15974400 | 0.00000000 |
| H | -0.14145900 | 2.23594100 | 0.00000000 |
| C | -1.14682100 | 0.39751400 | 0.00000000 |



|                                                                                                                                                                                                                                                                                                                                                                                                                               |                                                                                                                                                                                                                                                                                                                                                                                                              |
|-------------------------------------------------------------------------------------------------------------------------------------------------------------------------------------------------------------------------------------------------------------------------------------------------------------------------------------------------------------------------------------------------------------------------------|--------------------------------------------------------------------------------------------------------------------------------------------------------------------------------------------------------------------------------------------------------------------------------------------------------------------------------------------------------------------------------------------------------------|
| <p>S -1.20873300 -0.04891300 0.00000000<br/> H 2.17492100 1.34989500 0.00000000<br/> H -0.30375700 2.21570800 0.00000000<br/> N 0.32722300 -1.46147300 0.00000000</p>                                                                                                                                                                                                                                                         | <p>S 1.57273000 0.54751600 0.00000000<br/> C -1.17773400 -1.01310800 0.00000000<br/> N -1.28015600 -2.16415600 0.00000000<br/> H -2.11379900 0.88799000 0.00000000</p>                                                                                                                                                                                                                                       |
| <p>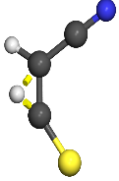<br/> <b>TS<sub>19-20</sub></b></p> <p>C 0.68971400 0.72791900 0.05179800<br/> H 0.15474500 1.33217600 -0.95189900<br/> C -0.68705100 0.97899800 0.06469300<br/> S 1.77459300 -0.44943800 0.00468200<br/> C -1.68905400 -0.04284400 0.03470400<br/> N -2.48516700 -0.87395000 -0.03811000<br/> H -1.03371400 1.99205000 0.23659400</p>    | <p><br/> <b>20</b></p> <p>C 0.00000000 1.08911300 0.00000000<br/> C -1.25932200 0.30421300 0.00000000<br/> S 1.54393300 0.83834700 0.00000000<br/> C -1.10888300 -1.15388800 0.00000000<br/> N -0.96998000 -2.29515300 0.00000000<br/> H -1.85192100 0.60794300 0.86850000<br/> H -1.85192100 0.60794300 -0.86850000</p>  |
| <p><br/> <b>TS<sub>20-11.21</sub></b></p> <p>C 0.00000000 1.47479900 0.00000000<br/> C -1.75664700 -0.26504200 0.00000000<br/> S 1.50341600 1.14236400 0.00000000<br/> C -1.04920800 -1.45765200 0.00000000<br/> N -0.41810700 -2.43423000 0.00000000<br/> H -2.14638600 0.12457800 0.92667500<br/> H -2.14638600 0.12457800 -0.92667500</p> | <p><br/> <b>21</b></p> <p>C 0.00000000 0.00000000 -1.11796100<br/> S 0.00000000 0.00000000 0.41923500</p>                                                                                                                                                                                                                 |
| <p><br/> <b>TS<sub>2b-22</sub></b></p> <p>C -1.74584600 -0.42606800 0.00000000<br/> C -1.36712400 -1.59077100 0.00000000<br/> H -0.81890200 -2.50317700 0.00000000<br/> H -2.53030300 0.29853500 0.00000000<br/> N 1.28155500 0.08857900 0.00000000<br/> C 2.17602400 -0.67885600 0.00000000<br/> S 0.00000000 1.10992200 0.00000000</p>   | <p><br/> <b>22</b></p> <p>C 1.42917600 -0.07023400 0.00000000<br/> C 1.44353900 -1.36722100 0.00000000<br/> H 2.11723600 -2.20285600 0.00000000<br/> H 2.32737900 0.54803700 0.00000000<br/> N -1.24185000 -0.10057100 0.00000000<br/> C -2.16465900 -0.82851500 0.00000000<br/> S 0.00000000 0.99716500 0.00000000</p> |
| <p><br/> <b>TS<sub>22-6,23</sub></b></p>                                                                                                                                                                                                                                                                                                   | <p><br/> <b>23</b></p>                                                                                                                                                                                                                                                                                                  |

|                                                                                                                    |             |             |             |                                                                                                                      |             |             |             |
|--------------------------------------------------------------------------------------------------------------------|-------------|-------------|-------------|----------------------------------------------------------------------------------------------------------------------|-------------|-------------|-------------|
| C                                                                                                                  | -1.48039400 | -1.13468400 | 0.00000000  | S                                                                                                                    | 0.00000000  | 0.00000000  | 0.97059700  |
| C                                                                                                                  | 1.05252800  | -1.39487200 | 0.00000000  | N                                                                                                                    | 0.00000000  | 0.00000000  | -0.64691000 |
| C                                                                                                                  | 1.30241600  | -0.12128300 | 0.00000000  | C                                                                                                                    | 0.00000000  | 0.00000000  | -1.83352900 |
| S                                                                                                                  | 0.00000000  | 1.10463100  | 0.00000000  |                                                                                                                      |             |             |             |
| H                                                                                                                  | 1.48427800  | -2.37579600 | 0.00000000  |                                                                                                                      |             |             |             |
| H                                                                                                                  | 2.29109300  | 0.32920100  | 0.00000000  |                                                                                                                      |             |             |             |
| 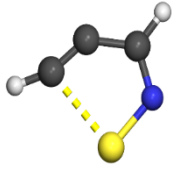<br><b>TS<sub>2c-31</sub></b>     |             |             |             | <br><b>31</b>                     |             |             |             |
| C                                                                                                                  | 1.20148000  | 0.73216300  | 0.00000000  | C                                                                                                                    | -1.10274800 | -0.37015300 | 0.00000000  |
| C                                                                                                                  | 1.27964700  | -0.69176200 | 0.00000000  | C                                                                                                                    | -1.20454900 | 1.04334700  | 0.00000000  |
| C                                                                                                                  | 0.46185600  | -1.62276200 | 0.00000000  | C                                                                                                                    | -1.30551000 | 2.24185300  | 0.00000000  |
| S                                                                                                                  | -1.23633200 | 0.13837300  | 0.00000000  | S                                                                                                                    | 1.56788800  | -0.79341800 | 0.00000000  |
| H                                                                                                                  | 2.05553600  | 1.39377000  | 0.00000000  | H                                                                                                                    | -2.02001900 | -0.95091300 | 0.00000000  |
| H                                                                                                                  | 0.06788000  | -2.61232100 | 0.00000000  | H                                                                                                                    | -1.38935800 | 3.30006800  | 0.00000000  |
| N                                                                                                                  | 0.00000000  | 1.21410600  | 0.00000000  | N                                                                                                                    | 0.00000000  | -1.02067800 | 0.00000000  |
| <br><b>TS<sub>31-32</sub></b>     |             |             |             | <br><b>32</b>                     |             |             |             |
| C                                                                                                                  | -0.61891000 | 3.09672100  | 0.00000000  | C                                                                                                                    | -0.20300100 | -2.93074300 | 0.00000000  |
| C                                                                                                                  | -0.20381400 | 1.91570700  | 0.00000000  | C                                                                                                                    | 0.63226800  | -1.90978600 | 0.00000000  |
| C                                                                                                                  | 0.00000000  | 0.58233600  | 0.00000000  | C                                                                                                                    | 0.24345300  | -0.55544300 | 0.00000000  |
| H                                                                                                                  | -0.35401700 | 4.13157500  | 0.00000000  | H                                                                                                                    | -0.13003000 | -4.00507000 | 0.00000000  |
| H                                                                                                                  | 1.11439400  | 1.48234700  | 0.00000000  | N                                                                                                                    | 0.00000000  | 0.58314600  | 0.00000000  |
| N                                                                                                                  | 0.01476700  | -0.61223700 | 0.00000000  | H                                                                                                                    | 1.71047800  | -2.09265500 | 0.00000000  |
| S                                                                                                                  | 0.25453700  | -2.18105300 | 0.00000000  | S                                                                                                                    | -0.35104800 | 2.14947100  | 0.00000000  |
| <br><b>TS<sub>35-6,23</sub></b> |             |             |             | <br><b>TS<sub>2d-38</sub></b>   |             |             |             |
| C                                                                                                                  | 2.26723900  | 0.96567800  | -0.00008000 | C                                                                                                                    | 1.30622900  | -0.76064000 | 0.00000000  |
| C                                                                                                                  | 2.34095400  | -0.25799200 | 0.00022800  | C                                                                                                                    | 1.28489900  | 0.69710000  | 0.00000000  |
| C                                                                                                                  | 0.47966300  | -1.05602400 | -0.00026600 | C                                                                                                                    | 0.00000000  | 1.06695800  | 0.00000000  |
| H                                                                                                                  | 1.92248700  | 1.97216000  | -0.00042900 | S                                                                                                                    | -1.36310000 | 0.27235800  | 0.00000000  |
| N                                                                                                                  | -0.53611100 | -0.43306400 | -0.00009300 | H                                                                                                                    | 2.26040100  | -1.29125400 | 0.00000000  |
| H                                                                                                                  | 2.90337800  | -1.16233900 | 0.00055100  | H                                                                                                                    | 2.16620900  | 1.31448400  | 0.00000000  |
| S                                                                                                                  | -1.97501400 | 0.26947800  | 0.00007800  | N                                                                                                                    | 0.26231800  | -1.48592300 | 0.00000000  |
| <br><b>38</b>                   |             |             |             | <br><b>TS<sub>38-39,9</sub></b> |             |             |             |
| C                                                                                                                  | -1.29100100 | -1.46172100 | 0.00000000  | C                                                                                                                    | -1.94736700 | -0.33379700 | 0.47030700  |

|                                                                                                                                                                                                                                                                                                                                                                                                                                                                  |                                                                                                                                                                                                                                                                                                                                                                                                                                           |
|------------------------------------------------------------------------------------------------------------------------------------------------------------------------------------------------------------------------------------------------------------------------------------------------------------------------------------------------------------------------------------------------------------------------------------------------------------------|-------------------------------------------------------------------------------------------------------------------------------------------------------------------------------------------------------------------------------------------------------------------------------------------------------------------------------------------------------------------------------------------------------------------------------------------|
| <p>C -1.14940600 0.00255300 0.00000000</p> <p>C 0.00000000 0.64397100 0.00000000</p> <p>S 1.35442700 1.39623300 0.00000000</p> <p>H -2.32860300 -1.82126600 0.00000000</p> <p>H -2.05735800 0.59361800 0.00000000</p> <p>N -0.37749100 -2.31727000 0.00000000</p>                                                                                                                                                                                                | <p>C -0.51773500 1.03272900 0.05833900</p> <p>C 0.61662000 0.47808000 -0.03886100</p> <p>S 1.98792300 -0.31438500 -0.03495200</p> <p>H -1.76256600 -0.54580000 1.50547900</p> <p>H -1.08281300 1.89291300 -0.22628100</p> <p>N -2.55292900 -0.48271700 -0.52266900</p>                                                                                                                                                                    |
| <p>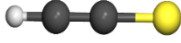</p> <p><b>39</b></p> <p>S 0.00000000 0.00000000 1.05831500</p> <p>C 0.00000000 0.00000000 -0.55978700</p> <p>C 0.00000000 0.00000000 -1.78753900</p> <p>H 0.00000000 0.00000000 -2.84908400</p>                                                                                                                                                                             | <p></p> <p><b>TS<sub>2d-40</sub></b></p> <p>C -1.02680600 -1.18476600 0.00000000</p> <p>C 1.31190300 -1.21355400 0.00000000</p> <p>C 1.25084800 0.02030100 0.00000000</p> <p>S 0.00000000 1.16403400 0.00000000</p> <p>H -1.56371000 -2.12162200 0.00000000</p> <p>H 1.71971000 -2.19744500 0.00000000</p> <p>N -1.33881100 -0.00533700 0.00000000</p> |
| <p></p> <p><b>40</b></p> <p>C -1.63408500 -1.11545200 0.00000000</p> <p>C 2.10979900 -0.96901100 0.00000000</p> <p>C 1.22879800 -0.14610900 0.00000000</p> <p>S 0.00000000 1.00510700 0.00000000</p> <p>H -2.55149400 -1.69818000 0.00000000</p> <p>H 2.89200100 -1.68634700 0.00000000</p> <p>N -1.50965500 0.09803600 0.00000000</p>                                          | <p></p> <p><b>TS<sub>40-39,9</sub></b></p> <p>C 1.59287900 1.18464700 0.00000000</p> <p>C -2.10507200 0.92548500 0.00000000</p> <p>C -1.23937000 0.08326000 0.00000000</p> <p>S 0.00000000 -1.03826500 0.00000000</p> <p>H 2.37157500 1.93377100 0.00000000</p> <p>H -2.88089200 1.64950600 0.00000000</p> <p>N 1.57409900 -0.01876900 0.00000000</p>  |
| <p></p> <p><b>3</b></p> <p>C 0.61539600 -0.95936500 0.00000000</p> <p>C 1.12239600 0.36711100 0.00000000</p> <p>C 0.00000000 1.12400800 0.00000000</p> <p>O -1.09107200 0.34544600 0.00000000</p> <p>H 1.15890000 -1.89072100 0.00000000</p> <p>H 2.14584800 0.69387100 0.00000000</p> <p>H -0.17588200 2.18593900 0.00000000</p> <p>N -0.68957700 -0.99188300 0.00000000</p> | <p></p> <p><b>3b</b></p> <p>C 0.65752800 -0.96583700 0.00000000</p> <p>C 1.15734100 0.36106600 0.00000000</p> <p>C 0.00000000 1.06743100 0.00000000</p> <p>O -1.07837700 0.26356900 0.00000000</p> <p>H 2.17107500 0.71234900 0.00000000</p> <p>H -0.20762100 2.12469300 0.00000000</p> <p>N -0.60366600 -1.10307800 0.00000000</p>                  |
| <p></p> <p><b>3c</b></p>                                                                                                                                                                                                                                                                                                                                                      | <p></p> <p><b>3d</b></p>                                                                                                                                                                                                                                                                                                                             |

|                                                                                                                     |             |             |             |                                                                                                                        |             |             |             |
|---------------------------------------------------------------------------------------------------------------------|-------------|-------------|-------------|------------------------------------------------------------------------------------------------------------------------|-------------|-------------|-------------|
| C                                                                                                                   | -0.66374000 | -0.97302400 | 0.00000000  | C                                                                                                                      | 0.00000000  | 1.08278000  | 0.00000000  |
| C                                                                                                                   | 0.74500600  | -0.95911200 | 0.00000000  | C                                                                                                                      | 1.17814700  | 0.28745800  | 0.00000000  |
| C                                                                                                                   | 1.11328800  | 0.33597600  | 0.00000000  | C                                                                                                                      | 0.63804000  | -0.95560100 | 0.00000000  |
| O                                                                                                                   | 0.00000000  | 1.09470400  | 0.00000000  | O                                                                                                                      | -0.65784700 | -0.99408800 | 0.00000000  |
| H                                                                                                                   | -1.35154200 | -1.80164300 | 0.00000000  | H                                                                                                                      | -0.07903200 | 2.15931800  | 0.00000000  |
| H                                                                                                                   | 2.05562400  | 0.85331100  | 0.00000000  | H                                                                                                                      | 2.20893900  | 0.58311200  | 0.00000000  |
| N                                                                                                                   | -1.12448700 | 0.25252300  | 0.00000000  | N                                                                                                                      | -1.10917900 | 0.38892200  | 0.00000000  |
| 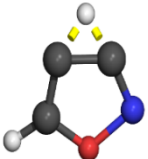 <p><b>TS<sub>3b-3c</sub></b></p>  |             |             |             |  <p><b>TS<sub>3c-3d</sub></b></p>   |             |             |             |
| C                                                                                                                   | 1.09362800  | 0.36248000  | 0.08695400  | C                                                                                                                      | -1.08754700 | -0.41892600 | 0.00713400  |
| C                                                                                                                   | 0.03121000  | 1.21882000  | 0.09880100  | C                                                                                                                      | 0.14597300  | -1.17195400 | 0.07243700  |
| C                                                                                                                   | -1.05023400 | 0.36950700  | -0.02482000 | C                                                                                                                      | 1.20683300  | -0.31106500 | 0.11995300  |
| O                                                                                                                   | -0.63969800 | -0.89176400 | -0.00439200 | O                                                                                                                      | 0.63959500  | 0.92326700  | -0.01549100 |
| H                                                                                                                   | 1.09753200  | 1.36336900  | -0.72219700 | H                                                                                                                      | -2.10897500 | -0.75905600 | -0.00574900 |
| H                                                                                                                   | -2.11659400 | 0.51739000  | -0.06621100 | H                                                                                                                      | 1.01594800  | -1.06790800 | -0.92107500 |
| N                                                                                                                   | 0.81271700  | -0.92164200 | -0.02029600 | N                                                                                                                      | -0.80218400 | 0.83607100  | -0.02091300 |
|  <p><b>TS<sub>3b-3d</sub></b></p> |             |             |             |  <p><b>TS<sub>3b-24</sub></b></p>  |             |             |             |
| C                                                                                                                   | -0.36561700 | 0.79556200  | 0.43052400  | C                                                                                                                      | 0.63597100  | -0.95594000 | 0.00000000  |
| C                                                                                                                   | -1.33184900 | 0.03887700  | -0.31913200 | C                                                                                                                      | 1.15186400  | 0.36672100  | 0.00000000  |
| C                                                                                                                   | -0.35642200 | -0.84399100 | 0.33769200  | C                                                                                                                      | 0.00000000  | 1.08496400  | 0.00000000  |
| N                                                                                                                   | 0.94156900  | -0.69290600 | -0.23507200 | O                                                                                                                      | -1.11833000 | 0.37584100  | 0.00000000  |
| H                                                                                                                   | -1.45194100 | 0.09996700  | -1.39233600 | H                                                                                                                      | 2.17128700  | 0.69923400  | 0.00000000  |
| H                                                                                                                   | -0.26031200 | -0.41075100 | 1.40680400  | H                                                                                                                      | -0.13531400 | 2.15861500  | 0.00000000  |
| O                                                                                                                   | 0.93057500  | 0.65230500  | -0.13293300 | N                                                                                                                      | -0.54519200 | -1.26272100 | 0.00000000  |
|  <p><b>24</b></p>                |             |             |             |  <p><b>TS<sub>24-25</sub></b></p> |             |             |             |
| O                                                                                                                   | 1.52400000  | -0.90391900 | -0.00000700 | C                                                                                                                      | -1.26437800 | 0.29214200  | -0.02930100 |
| C                                                                                                                   | 1.31647800  | 0.29561000  | 0.00001500  | H                                                                                                                      | -0.91062900 | 1.06292900  | 0.98262500  |
| C                                                                                                                   | -0.00909100 | 0.88428600  | 0.00000300  | C                                                                                                                      | 0.03171600  | 0.85140000  | -0.07190500 |
| C                                                                                                                   | -1.16803600 | 0.11461700  | -0.00001700 | C                                                                                                                      | 1.22500900  | 0.06989800  | -0.04108000 |
| N                                                                                                                   | -2.15127200 | -0.50273600 | 0.00000800  | N                                                                                                                      | 2.17428800  | -0.57946300 | 0.04693500  |
| H                                                                                                                   | -0.11559700 | 1.96162300  | -0.00000500 | H                                                                                                                      | 0.10577500  | 1.90709200  | -0.28805100 |
| H                                                                                                                   | 2.14639900  | 1.02180600  | -0.00000300 | O                                                                                                                      | -1.79615600 | -0.77430300 | -0.02117500 |

|                                                                                                                                                                                                                                                                                                                                                                                                                                                                                                                                                                                                                                                                                                                                                   |             |             |             |             |   |             |             |             |                                                                                                                                                                                                                                                                                                                                                                                                                                                                                                                                                                                                                                                                                                                                                               |             |             |             |                                                                                                                                                                                                                                                                                                                                                                                                                                                                                                                                                                                                                                                                                                                                                                  |            |             |             |            |            |            |             |            |             |             |             |            |             |             |             |                                                                                                                                                                                                                                                                                                                                                                                                                                                                                                                                                                                                                                                                                                                                                                          |   |             |             |             |   |             |             |             |   |             |             |             |   |             |             |             |   |             |             |             |   |            |            |             |   |            |             |            |
|---------------------------------------------------------------------------------------------------------------------------------------------------------------------------------------------------------------------------------------------------------------------------------------------------------------------------------------------------------------------------------------------------------------------------------------------------------------------------------------------------------------------------------------------------------------------------------------------------------------------------------------------------------------------------------------------------------------------------------------------------|-------------|-------------|-------------|-------------|---|-------------|-------------|-------------|---------------------------------------------------------------------------------------------------------------------------------------------------------------------------------------------------------------------------------------------------------------------------------------------------------------------------------------------------------------------------------------------------------------------------------------------------------------------------------------------------------------------------------------------------------------------------------------------------------------------------------------------------------------------------------------------------------------------------------------------------------------|-------------|-------------|-------------|------------------------------------------------------------------------------------------------------------------------------------------------------------------------------------------------------------------------------------------------------------------------------------------------------------------------------------------------------------------------------------------------------------------------------------------------------------------------------------------------------------------------------------------------------------------------------------------------------------------------------------------------------------------------------------------------------------------------------------------------------------------|------------|-------------|-------------|------------|------------|------------|-------------|------------|-------------|-------------|-------------|------------|-------------|-------------|-------------|--------------------------------------------------------------------------------------------------------------------------------------------------------------------------------------------------------------------------------------------------------------------------------------------------------------------------------------------------------------------------------------------------------------------------------------------------------------------------------------------------------------------------------------------------------------------------------------------------------------------------------------------------------------------------------------------------------------------------------------------------------------------------|---|-------------|-------------|-------------|---|-------------|-------------|-------------|---|-------------|-------------|-------------|---|-------------|-------------|-------------|---|-------------|-------------|-------------|---|------------|------------|-------------|---|------------|-------------|------------|
| 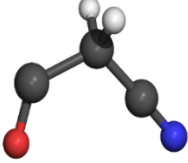 <p style="text-align: center;"><b>25</b></p> <table border="1"> <tbody> <tr><td>C</td><td>-1.36718800</td><td>0.29051300</td><td>-0.00022500</td></tr> <tr><td>C</td><td>0.00226000</td><td>0.98831300</td><td>0.00006100</td></tr> <tr><td>C</td><td>1.14369300</td><td>0.08276400</td><td>0.00002200</td></tr> <tr><td>N</td><td>2.02325000</td><td>-0.65781000</td><td>-0.00004600</td></tr> <tr><td>H</td><td>0.02698700</td><td>1.64089100</td><td>-0.87433500</td></tr> <tr><td>H</td><td>0.02669900</td><td>1.64042400</td><td>0.87482600</td></tr> <tr><td>O</td><td>-1.61112800</td><td>-0.85577300</td><td>0.00008600</td></tr> </tbody> </table>     | C           | -1.36718800 | 0.29051300  | -0.00022500 | C | 0.00226000  | 0.98831300  | 0.00006100  | C                                                                                                                                                                                                                                                                                                                                                                                                                                                                                                                                                                                                                                                                                                                                                             | 1.14369300  | 0.08276400  | 0.00002200  | N                                                                                                                                                                                                                                                                                                                                                                                                                                                                                                                                                                                                                                                                                                                                                                | 2.02325000 | -0.65781000 | -0.00004600 | H          | 0.02698700 | 1.64089100 | -0.87433500 | H          | 0.02669900  | 1.64042400  | 0.87482600  | O          | -1.61112800 | -0.85577300 | 0.00008600  |  <p style="text-align: center;"><b>TS<sub>25-26,11</sub></b></p> <table border="1"> <tbody> <tr><td>C</td><td>1.59884000</td><td>-0.11221800</td><td>0.00000000</td></tr> <tr><td>C</td><td>0.00000000</td><td>1.16553600</td><td>0.00000000</td></tr> <tr><td>C</td><td>-1.17400100</td><td>0.38901300</td><td>0.00000000</td></tr> <tr><td>N</td><td>-2.10485700</td><td>-0.29905100</td><td>0.00000000</td></tr> <tr><td>H</td><td>0.23477800</td><td>1.69628500</td><td>0.91253500</td></tr> <tr><td>H</td><td>0.23477800</td><td>1.69628500</td><td>-0.91253500</td></tr> <tr><td>O</td><td>1.46442700</td><td>-1.24415000</td><td>0.00000000</td></tr> </tbody> </table>        | C | 1.59884000  | -0.11221800 | 0.00000000  | C | 0.00000000  | 1.16553600  | 0.00000000  | C | -1.17400100 | 0.38901300  | 0.00000000  | N | -2.10485700 | -0.29905100 | 0.00000000  | H | 0.23477800  | 1.69628500  | 0.91253500  | H | 0.23477800 | 1.69628500 | -0.91253500 | O | 1.46442700 | -1.24415000 | 0.00000000 |
| C                                                                                                                                                                                                                                                                                                                                                                                                                                                                                                                                                                                                                                                                                                                                                 | -1.36718800 | 0.29051300  | -0.00022500 |             |   |             |             |             |                                                                                                                                                                                                                                                                                                                                                                                                                                                                                                                                                                                                                                                                                                                                                               |             |             |             |                                                                                                                                                                                                                                                                                                                                                                                                                                                                                                                                                                                                                                                                                                                                                                  |            |             |             |            |            |            |             |            |             |             |             |            |             |             |             |                                                                                                                                                                                                                                                                                                                                                                                                                                                                                                                                                                                                                                                                                                                                                                          |   |             |             |             |   |             |             |             |   |             |             |             |   |             |             |             |   |             |             |             |   |            |            |             |   |            |             |            |
| C                                                                                                                                                                                                                                                                                                                                                                                                                                                                                                                                                                                                                                                                                                                                                 | 0.00226000  | 0.98831300  | 0.00006100  |             |   |             |             |             |                                                                                                                                                                                                                                                                                                                                                                                                                                                                                                                                                                                                                                                                                                                                                               |             |             |             |                                                                                                                                                                                                                                                                                                                                                                                                                                                                                                                                                                                                                                                                                                                                                                  |            |             |             |            |            |            |             |            |             |             |             |            |             |             |             |                                                                                                                                                                                                                                                                                                                                                                                                                                                                                                                                                                                                                                                                                                                                                                          |   |             |             |             |   |             |             |             |   |             |             |             |   |             |             |             |   |             |             |             |   |            |            |             |   |            |             |            |
| C                                                                                                                                                                                                                                                                                                                                                                                                                                                                                                                                                                                                                                                                                                                                                 | 1.14369300  | 0.08276400  | 0.00002200  |             |   |             |             |             |                                                                                                                                                                                                                                                                                                                                                                                                                                                                                                                                                                                                                                                                                                                                                               |             |             |             |                                                                                                                                                                                                                                                                                                                                                                                                                                                                                                                                                                                                                                                                                                                                                                  |            |             |             |            |            |            |             |            |             |             |             |            |             |             |             |                                                                                                                                                                                                                                                                                                                                                                                                                                                                                                                                                                                                                                                                                                                                                                          |   |             |             |             |   |             |             |             |   |             |             |             |   |             |             |             |   |             |             |             |   |            |            |             |   |            |             |            |
| N                                                                                                                                                                                                                                                                                                                                                                                                                                                                                                                                                                                                                                                                                                                                                 | 2.02325000  | -0.65781000 | -0.00004600 |             |   |             |             |             |                                                                                                                                                                                                                                                                                                                                                                                                                                                                                                                                                                                                                                                                                                                                                               |             |             |             |                                                                                                                                                                                                                                                                                                                                                                                                                                                                                                                                                                                                                                                                                                                                                                  |            |             |             |            |            |            |             |            |             |             |             |            |             |             |             |                                                                                                                                                                                                                                                                                                                                                                                                                                                                                                                                                                                                                                                                                                                                                                          |   |             |             |             |   |             |             |             |   |             |             |             |   |             |             |             |   |             |             |             |   |            |            |             |   |            |             |            |
| H                                                                                                                                                                                                                                                                                                                                                                                                                                                                                                                                                                                                                                                                                                                                                 | 0.02698700  | 1.64089100  | -0.87433500 |             |   |             |             |             |                                                                                                                                                                                                                                                                                                                                                                                                                                                                                                                                                                                                                                                                                                                                                               |             |             |             |                                                                                                                                                                                                                                                                                                                                                                                                                                                                                                                                                                                                                                                                                                                                                                  |            |             |             |            |            |            |             |            |             |             |             |            |             |             |             |                                                                                                                                                                                                                                                                                                                                                                                                                                                                                                                                                                                                                                                                                                                                                                          |   |             |             |             |   |             |             |             |   |             |             |             |   |             |             |             |   |             |             |             |   |            |            |             |   |            |             |            |
| H                                                                                                                                                                                                                                                                                                                                                                                                                                                                                                                                                                                                                                                                                                                                                 | 0.02669900  | 1.64042400  | 0.87482600  |             |   |             |             |             |                                                                                                                                                                                                                                                                                                                                                                                                                                                                                                                                                                                                                                                                                                                                                               |             |             |             |                                                                                                                                                                                                                                                                                                                                                                                                                                                                                                                                                                                                                                                                                                                                                                  |            |             |             |            |            |            |             |            |             |             |             |            |             |             |             |                                                                                                                                                                                                                                                                                                                                                                                                                                                                                                                                                                                                                                                                                                                                                                          |   |             |             |             |   |             |             |             |   |             |             |             |   |             |             |             |   |             |             |             |   |            |            |             |   |            |             |            |
| O                                                                                                                                                                                                                                                                                                                                                                                                                                                                                                                                                                                                                                                                                                                                                 | -1.61112800 | -0.85577300 | 0.00008600  |             |   |             |             |             |                                                                                                                                                                                                                                                                                                                                                                                                                                                                                                                                                                                                                                                                                                                                                               |             |             |             |                                                                                                                                                                                                                                                                                                                                                                                                                                                                                                                                                                                                                                                                                                                                                                  |            |             |             |            |            |            |             |            |             |             |             |            |             |             |             |                                                                                                                                                                                                                                                                                                                                                                                                                                                                                                                                                                                                                                                                                                                                                                          |   |             |             |             |   |             |             |             |   |             |             |             |   |             |             |             |   |             |             |             |   |            |            |             |   |            |             |            |
| C                                                                                                                                                                                                                                                                                                                                                                                                                                                                                                                                                                                                                                                                                                                                                 | 1.59884000  | -0.11221800 | 0.00000000  |             |   |             |             |             |                                                                                                                                                                                                                                                                                                                                                                                                                                                                                                                                                                                                                                                                                                                                                               |             |             |             |                                                                                                                                                                                                                                                                                                                                                                                                                                                                                                                                                                                                                                                                                                                                                                  |            |             |             |            |            |            |             |            |             |             |             |            |             |             |             |                                                                                                                                                                                                                                                                                                                                                                                                                                                                                                                                                                                                                                                                                                                                                                          |   |             |             |             |   |             |             |             |   |             |             |             |   |             |             |             |   |             |             |             |   |            |            |             |   |            |             |            |
| C                                                                                                                                                                                                                                                                                                                                                                                                                                                                                                                                                                                                                                                                                                                                                 | 0.00000000  | 1.16553600  | 0.00000000  |             |   |             |             |             |                                                                                                                                                                                                                                                                                                                                                                                                                                                                                                                                                                                                                                                                                                                                                               |             |             |             |                                                                                                                                                                                                                                                                                                                                                                                                                                                                                                                                                                                                                                                                                                                                                                  |            |             |             |            |            |            |             |            |             |             |             |            |             |             |             |                                                                                                                                                                                                                                                                                                                                                                                                                                                                                                                                                                                                                                                                                                                                                                          |   |             |             |             |   |             |             |             |   |             |             |             |   |             |             |             |   |             |             |             |   |            |            |             |   |            |             |            |
| C                                                                                                                                                                                                                                                                                                                                                                                                                                                                                                                                                                                                                                                                                                                                                 | -1.17400100 | 0.38901300  | 0.00000000  |             |   |             |             |             |                                                                                                                                                                                                                                                                                                                                                                                                                                                                                                                                                                                                                                                                                                                                                               |             |             |             |                                                                                                                                                                                                                                                                                                                                                                                                                                                                                                                                                                                                                                                                                                                                                                  |            |             |             |            |            |            |             |            |             |             |             |            |             |             |             |                                                                                                                                                                                                                                                                                                                                                                                                                                                                                                                                                                                                                                                                                                                                                                          |   |             |             |             |   |             |             |             |   |             |             |             |   |             |             |             |   |             |             |             |   |            |            |             |   |            |             |            |
| N                                                                                                                                                                                                                                                                                                                                                                                                                                                                                                                                                                                                                                                                                                                                                 | -2.10485700 | -0.29905100 | 0.00000000  |             |   |             |             |             |                                                                                                                                                                                                                                                                                                                                                                                                                                                                                                                                                                                                                                                                                                                                                               |             |             |             |                                                                                                                                                                                                                                                                                                                                                                                                                                                                                                                                                                                                                                                                                                                                                                  |            |             |             |            |            |            |             |            |             |             |             |            |             |             |             |                                                                                                                                                                                                                                                                                                                                                                                                                                                                                                                                                                                                                                                                                                                                                                          |   |             |             |             |   |             |             |             |   |             |             |             |   |             |             |             |   |             |             |             |   |            |            |             |   |            |             |            |
| H                                                                                                                                                                                                                                                                                                                                                                                                                                                                                                                                                                                                                                                                                                                                                 | 0.23477800  | 1.69628500  | 0.91253500  |             |   |             |             |             |                                                                                                                                                                                                                                                                                                                                                                                                                                                                                                                                                                                                                                                                                                                                                               |             |             |             |                                                                                                                                                                                                                                                                                                                                                                                                                                                                                                                                                                                                                                                                                                                                                                  |            |             |             |            |            |            |             |            |             |             |             |            |             |             |             |                                                                                                                                                                                                                                                                                                                                                                                                                                                                                                                                                                                                                                                                                                                                                                          |   |             |             |             |   |             |             |             |   |             |             |             |   |             |             |             |   |             |             |             |   |            |            |             |   |            |             |            |
| H                                                                                                                                                                                                                                                                                                                                                                                                                                                                                                                                                                                                                                                                                                                                                 | 0.23477800  | 1.69628500  | -0.91253500 |             |   |             |             |             |                                                                                                                                                                                                                                                                                                                                                                                                                                                                                                                                                                                                                                                                                                                                                               |             |             |             |                                                                                                                                                                                                                                                                                                                                                                                                                                                                                                                                                                                                                                                                                                                                                                  |            |             |             |            |            |            |             |            |             |             |             |            |             |             |             |                                                                                                                                                                                                                                                                                                                                                                                                                                                                                                                                                                                                                                                                                                                                                                          |   |             |             |             |   |             |             |             |   |             |             |             |   |             |             |             |   |             |             |             |   |            |            |             |   |            |             |            |
| O                                                                                                                                                                                                                                                                                                                                                                                                                                                                                                                                                                                                                                                                                                                                                 | 1.46442700  | -1.24415000 | 0.00000000  |             |   |             |             |             |                                                                                                                                                                                                                                                                                                                                                                                                                                                                                                                                                                                                                                                                                                                                                               |             |             |             |                                                                                                                                                                                                                                                                                                                                                                                                                                                                                                                                                                                                                                                                                                                                                                  |            |             |             |            |            |            |             |            |             |             |             |            |             |             |             |                                                                                                                                                                                                                                                                                                                                                                                                                                                                                                                                                                                                                                                                                                                                                                          |   |             |             |             |   |             |             |             |   |             |             |             |   |             |             |             |   |             |             |             |   |            |            |             |   |            |             |            |
|  <p style="text-align: center;"><b>26</b></p> <table border="1"> <tbody> <tr><td>C</td><td>0.00000000</td><td>0.00000000</td><td>-0.64351700</td></tr> <tr><td>O</td><td>0.00000000</td><td>0.00000000</td><td>0.48263800</td></tr> </tbody> </table>                                                                                                                                                                                                                                                                                                                                                                                                            | C           | 0.00000000  | 0.00000000  | -0.64351700 | O | 0.00000000  | 0.00000000  | 0.48263800  |  <p style="text-align: center;"><b>TS<sub>3b-27</sub></b></p> <table border="1"> <tbody> <tr><td>C</td><td>-1.48408900</td><td>-0.81261600</td><td>0.00000000</td></tr> <tr><td>C</td><td>1.05294600</td><td>-1.05171900</td><td>0.00000000</td></tr> <tr><td>C</td><td>1.13075700</td><td>0.24515200</td><td>0.00000000</td></tr> <tr><td>O</td><td>0.00000000</td><td>1.07326700</td><td>0.00000000</td></tr> <tr><td>H</td><td>1.60605200</td><td>-1.96749900</td><td>0.00000000</td></tr> <tr><td>H</td><td>2.02233500</td><td>0.85840500</td><td>0.00000000</td></tr> <tr><td>N</td><td>-1.11800900</td><td>0.31972200</td><td>0.00000000</td></tr> </tbody> </table> | C           | -1.48408900 | -0.81261600 | 0.00000000                                                                                                                                                                                                                                                                                                                                                                                                                                                                                                                                                                                                                                                                                                                                                       | C          | 1.05294600  | -1.05171900 | 0.00000000 | C          | 1.13075700 | 0.24515200  | 0.00000000 | O           | 0.00000000  | 1.07326700  | 0.00000000 | H           | 1.60605200  | -1.96749900 | 0.00000000                                                                                                                                                                                                                                                                                                                                                                                                                                                                                                                                                                                                                                                                                                                                                               | H | 2.02233500  | 0.85840500  | 0.00000000  | N | -1.11800900 | 0.31972200  | 0.00000000  |   |             |             |             |   |             |             |             |   |             |             |             |   |            |            |             |   |            |             |            |
| C                                                                                                                                                                                                                                                                                                                                                                                                                                                                                                                                                                                                                                                                                                                                                 | 0.00000000  | 0.00000000  | -0.64351700 |             |   |             |             |             |                                                                                                                                                                                                                                                                                                                                                                                                                                                                                                                                                                                                                                                                                                                                                               |             |             |             |                                                                                                                                                                                                                                                                                                                                                                                                                                                                                                                                                                                                                                                                                                                                                                  |            |             |             |            |            |            |             |            |             |             |             |            |             |             |             |                                                                                                                                                                                                                                                                                                                                                                                                                                                                                                                                                                                                                                                                                                                                                                          |   |             |             |             |   |             |             |             |   |             |             |             |   |             |             |             |   |             |             |             |   |            |            |             |   |            |             |            |
| O                                                                                                                                                                                                                                                                                                                                                                                                                                                                                                                                                                                                                                                                                                                                                 | 0.00000000  | 0.00000000  | 0.48263800  |             |   |             |             |             |                                                                                                                                                                                                                                                                                                                                                                                                                                                                                                                                                                                                                                                                                                                                                               |             |             |             |                                                                                                                                                                                                                                                                                                                                                                                                                                                                                                                                                                                                                                                                                                                                                                  |            |             |             |            |            |            |             |            |             |             |             |            |             |             |             |                                                                                                                                                                                                                                                                                                                                                                                                                                                                                                                                                                                                                                                                                                                                                                          |   |             |             |             |   |             |             |             |   |             |             |             |   |             |             |             |   |             |             |             |   |            |            |             |   |            |             |            |
| C                                                                                                                                                                                                                                                                                                                                                                                                                                                                                                                                                                                                                                                                                                                                                 | -1.48408900 | -0.81261600 | 0.00000000  |             |   |             |             |             |                                                                                                                                                                                                                                                                                                                                                                                                                                                                                                                                                                                                                                                                                                                                                               |             |             |             |                                                                                                                                                                                                                                                                                                                                                                                                                                                                                                                                                                                                                                                                                                                                                                  |            |             |             |            |            |            |             |            |             |             |             |            |             |             |             |                                                                                                                                                                                                                                                                                                                                                                                                                                                                                                                                                                                                                                                                                                                                                                          |   |             |             |             |   |             |             |             |   |             |             |             |   |             |             |             |   |             |             |             |   |            |            |             |   |            |             |            |
| C                                                                                                                                                                                                                                                                                                                                                                                                                                                                                                                                                                                                                                                                                                                                                 | 1.05294600  | -1.05171900 | 0.00000000  |             |   |             |             |             |                                                                                                                                                                                                                                                                                                                                                                                                                                                                                                                                                                                                                                                                                                                                                               |             |             |             |                                                                                                                                                                                                                                                                                                                                                                                                                                                                                                                                                                                                                                                                                                                                                                  |            |             |             |            |            |            |             |            |             |             |             |            |             |             |             |                                                                                                                                                                                                                                                                                                                                                                                                                                                                                                                                                                                                                                                                                                                                                                          |   |             |             |             |   |             |             |             |   |             |             |             |   |             |             |             |   |             |             |             |   |            |            |             |   |            |             |            |
| C                                                                                                                                                                                                                                                                                                                                                                                                                                                                                                                                                                                                                                                                                                                                                 | 1.13075700  | 0.24515200  | 0.00000000  |             |   |             |             |             |                                                                                                                                                                                                                                                                                                                                                                                                                                                                                                                                                                                                                                                                                                                                                               |             |             |             |                                                                                                                                                                                                                                                                                                                                                                                                                                                                                                                                                                                                                                                                                                                                                                  |            |             |             |            |            |            |             |            |             |             |             |            |             |             |             |                                                                                                                                                                                                                                                                                                                                                                                                                                                                                                                                                                                                                                                                                                                                                                          |   |             |             |             |   |             |             |             |   |             |             |             |   |             |             |             |   |             |             |             |   |            |            |             |   |            |             |            |
| O                                                                                                                                                                                                                                                                                                                                                                                                                                                                                                                                                                                                                                                                                                                                                 | 0.00000000  | 1.07326700  | 0.00000000  |             |   |             |             |             |                                                                                                                                                                                                                                                                                                                                                                                                                                                                                                                                                                                                                                                                                                                                                               |             |             |             |                                                                                                                                                                                                                                                                                                                                                                                                                                                                                                                                                                                                                                                                                                                                                                  |            |             |             |            |            |            |             |            |             |             |             |            |             |             |             |                                                                                                                                                                                                                                                                                                                                                                                                                                                                                                                                                                                                                                                                                                                                                                          |   |             |             |             |   |             |             |             |   |             |             |             |   |             |             |             |   |             |             |             |   |            |            |             |   |            |             |            |
| H                                                                                                                                                                                                                                                                                                                                                                                                                                                                                                                                                                                                                                                                                                                                                 | 1.60605200  | -1.96749900 | 0.00000000  |             |   |             |             |             |                                                                                                                                                                                                                                                                                                                                                                                                                                                                                                                                                                                                                                                                                                                                                               |             |             |             |                                                                                                                                                                                                                                                                                                                                                                                                                                                                                                                                                                                                                                                                                                                                                                  |            |             |             |            |            |            |             |            |             |             |             |            |             |             |             |                                                                                                                                                                                                                                                                                                                                                                                                                                                                                                                                                                                                                                                                                                                                                                          |   |             |             |             |   |             |             |             |   |             |             |             |   |             |             |             |   |             |             |             |   |            |            |             |   |            |             |            |
| H                                                                                                                                                                                                                                                                                                                                                                                                                                                                                                                                                                                                                                                                                                                                                 | 2.02233500  | 0.85840500  | 0.00000000  |             |   |             |             |             |                                                                                                                                                                                                                                                                                                                                                                                                                                                                                                                                                                                                                                                                                                                                                               |             |             |             |                                                                                                                                                                                                                                                                                                                                                                                                                                                                                                                                                                                                                                                                                                                                                                  |            |             |             |            |            |            |             |            |             |             |             |            |             |             |             |                                                                                                                                                                                                                                                                                                                                                                                                                                                                                                                                                                                                                                                                                                                                                                          |   |             |             |             |   |             |             |             |   |             |             |             |   |             |             |             |   |             |             |             |   |            |            |             |   |            |             |            |
| N                                                                                                                                                                                                                                                                                                                                                                                                                                                                                                                                                                                                                                                                                                                                                 | -1.11800900 | 0.31972200  | 0.00000000  |             |   |             |             |             |                                                                                                                                                                                                                                                                                                                                                                                                                                                                                                                                                                                                                                                                                                                                                               |             |             |             |                                                                                                                                                                                                                                                                                                                                                                                                                                                                                                                                                                                                                                                                                                                                                                  |            |             |             |            |            |            |             |            |             |             |             |            |             |             |             |                                                                                                                                                                                                                                                                                                                                                                                                                                                                                                                                                                                                                                                                                                                                                                          |   |             |             |             |   |             |             |             |   |             |             |             |   |             |             |             |   |             |             |             |   |            |            |             |   |            |             |            |
|  <p style="text-align: center;"><b>27</b></p> <table border="1"> <tbody> <tr><td>C</td><td>1.19962600</td><td>-0.35425100</td><td>0.00074000</td></tr> <tr><td>O</td><td>-0.08369100</td><td>-0.92919800</td><td>-0.00066800</td></tr> <tr><td>C</td><td>1.46471000</td><td>0.91595400</td><td>-0.00050500</td></tr> <tr><td>H</td><td>1.91734600</td><td>-1.16624000</td><td>0.00120000</td></tr> <tr><td>H</td><td>2.28871400</td><td>1.60065400</td><td>0.00008800</td></tr> <tr><td>N</td><td>-1.06293500</td><td>-0.03633300</td><td>0.00022300</td></tr> <tr><td>C</td><td>-2.01366700</td><td>0.64721400</td><td>0.00018000</td></tr> </tbody> </table> | C           | 1.19962600  | -0.35425100 | 0.00074000  | O | -0.08369100 | -0.92919800 | -0.00066800 | C                                                                                                                                                                                                                                                                                                                                                                                                                                                                                                                                                                                                                                                                                                                                                             | 1.46471000  | 0.91595400  | -0.00050500 | H                                                                                                                                                                                                                                                                                                                                                                                                                                                                                                                                                                                                                                                                                                                                                                | 1.91734600 | -1.16624000 | 0.00120000  | H          | 2.28871400 | 1.60065400 | 0.00008800  | N          | -1.06293500 | -0.03633300 | 0.00022300  | C          | -2.01366700 | 0.64721400  | 0.00018000  |  <p style="text-align: center;"><b>TS<sub>27-28,6</sub></b></p> <table border="1"> <tbody> <tr><td>C</td><td>-1.50797500</td><td>0.33320000</td><td>-0.00016600</td></tr> <tr><td>O</td><td>0.26165000</td><td>0.97772900</td><td>-0.00022500</td></tr> <tr><td>C</td><td>-1.64540500</td><td>-0.88937000</td><td>-0.00009100</td></tr> <tr><td>H</td><td>-1.92393300</td><td>1.31590500</td><td>-0.00015200</td></tr> <tr><td>H</td><td>-1.52799900</td><td>-1.94738500</td><td>-0.00045600</td></tr> <tr><td>N</td><td>1.17249300</td><td>0.08566000</td><td>0.00023000</td></tr> <tr><td>C</td><td>2.01192700</td><td>-0.74215900</td><td>0.00039000</td></tr> </tbody> </table> | C | -1.50797500 | 0.33320000  | -0.00016600 | O | 0.26165000  | 0.97772900  | -0.00022500 | C | -1.64540500 | -0.88937000 | -0.00009100 | H | -1.92393300 | 1.31590500  | -0.00015200 | H | -1.52799900 | -1.94738500 | -0.00045600 | N | 1.17249300 | 0.08566000 | 0.00023000  | C | 2.01192700 | -0.74215900 | 0.00039000 |
| C                                                                                                                                                                                                                                                                                                                                                                                                                                                                                                                                                                                                                                                                                                                                                 | 1.19962600  | -0.35425100 | 0.00074000  |             |   |             |             |             |                                                                                                                                                                                                                                                                                                                                                                                                                                                                                                                                                                                                                                                                                                                                                               |             |             |             |                                                                                                                                                                                                                                                                                                                                                                                                                                                                                                                                                                                                                                                                                                                                                                  |            |             |             |            |            |            |             |            |             |             |             |            |             |             |             |                                                                                                                                                                                                                                                                                                                                                                                                                                                                                                                                                                                                                                                                                                                                                                          |   |             |             |             |   |             |             |             |   |             |             |             |   |             |             |             |   |             |             |             |   |            |            |             |   |            |             |            |
| O                                                                                                                                                                                                                                                                                                                                                                                                                                                                                                                                                                                                                                                                                                                                                 | -0.08369100 | -0.92919800 | -0.00066800 |             |   |             |             |             |                                                                                                                                                                                                                                                                                                                                                                                                                                                                                                                                                                                                                                                                                                                                                               |             |             |             |                                                                                                                                                                                                                                                                                                                                                                                                                                                                                                                                                                                                                                                                                                                                                                  |            |             |             |            |            |            |             |            |             |             |             |            |             |             |             |                                                                                                                                                                                                                                                                                                                                                                                                                                                                                                                                                                                                                                                                                                                                                                          |   |             |             |             |   |             |             |             |   |             |             |             |   |             |             |             |   |             |             |             |   |            |            |             |   |            |             |            |
| C                                                                                                                                                                                                                                                                                                                                                                                                                                                                                                                                                                                                                                                                                                                                                 | 1.46471000  | 0.91595400  | -0.00050500 |             |   |             |             |             |                                                                                                                                                                                                                                                                                                                                                                                                                                                                                                                                                                                                                                                                                                                                                               |             |             |             |                                                                                                                                                                                                                                                                                                                                                                                                                                                                                                                                                                                                                                                                                                                                                                  |            |             |             |            |            |            |             |            |             |             |             |            |             |             |             |                                                                                                                                                                                                                                                                                                                                                                                                                                                                                                                                                                                                                                                                                                                                                                          |   |             |             |             |   |             |             |             |   |             |             |             |   |             |             |             |   |             |             |             |   |            |            |             |   |            |             |            |
| H                                                                                                                                                                                                                                                                                                                                                                                                                                                                                                                                                                                                                                                                                                                                                 | 1.91734600  | -1.16624000 | 0.00120000  |             |   |             |             |             |                                                                                                                                                                                                                                                                                                                                                                                                                                                                                                                                                                                                                                                                                                                                                               |             |             |             |                                                                                                                                                                                                                                                                                                                                                                                                                                                                                                                                                                                                                                                                                                                                                                  |            |             |             |            |            |            |             |            |             |             |             |            |             |             |             |                                                                                                                                                                                                                                                                                                                                                                                                                                                                                                                                                                                                                                                                                                                                                                          |   |             |             |             |   |             |             |             |   |             |             |             |   |             |             |             |   |             |             |             |   |            |            |             |   |            |             |            |
| H                                                                                                                                                                                                                                                                                                                                                                                                                                                                                                                                                                                                                                                                                                                                                 | 2.28871400  | 1.60065400  | 0.00008800  |             |   |             |             |             |                                                                                                                                                                                                                                                                                                                                                                                                                                                                                                                                                                                                                                                                                                                                                               |             |             |             |                                                                                                                                                                                                                                                                                                                                                                                                                                                                                                                                                                                                                                                                                                                                                                  |            |             |             |            |            |            |             |            |             |             |             |            |             |             |             |                                                                                                                                                                                                                                                                                                                                                                                                                                                                                                                                                                                                                                                                                                                                                                          |   |             |             |             |   |             |             |             |   |             |             |             |   |             |             |             |   |             |             |             |   |            |            |             |   |            |             |            |
| N                                                                                                                                                                                                                                                                                                                                                                                                                                                                                                                                                                                                                                                                                                                                                 | -1.06293500 | -0.03633300 | 0.00022300  |             |   |             |             |             |                                                                                                                                                                                                                                                                                                                                                                                                                                                                                                                                                                                                                                                                                                                                                               |             |             |             |                                                                                                                                                                                                                                                                                                                                                                                                                                                                                                                                                                                                                                                                                                                                                                  |            |             |             |            |            |            |             |            |             |             |             |            |             |             |             |                                                                                                                                                                                                                                                                                                                                                                                                                                                                                                                                                                                                                                                                                                                                                                          |   |             |             |             |   |             |             |             |   |             |             |             |   |             |             |             |   |             |             |             |   |            |            |             |   |            |             |            |
| C                                                                                                                                                                                                                                                                                                                                                                                                                                                                                                                                                                                                                                                                                                                                                 | -2.01366700 | 0.64721400  | 0.00018000  |             |   |             |             |             |                                                                                                                                                                                                                                                                                                                                                                                                                                                                                                                                                                                                                                                                                                                                                               |             |             |             |                                                                                                                                                                                                                                                                                                                                                                                                                                                                                                                                                                                                                                                                                                                                                                  |            |             |             |            |            |            |             |            |             |             |             |            |             |             |             |                                                                                                                                                                                                                                                                                                                                                                                                                                                                                                                                                                                                                                                                                                                                                                          |   |             |             |             |   |             |             |             |   |             |             |             |   |             |             |             |   |             |             |             |   |            |            |             |   |            |             |            |
| C                                                                                                                                                                                                                                                                                                                                                                                                                                                                                                                                                                                                                                                                                                                                                 | -1.50797500 | 0.33320000  | -0.00016600 |             |   |             |             |             |                                                                                                                                                                                                                                                                                                                                                                                                                                                                                                                                                                                                                                                                                                                                                               |             |             |             |                                                                                                                                                                                                                                                                                                                                                                                                                                                                                                                                                                                                                                                                                                                                                                  |            |             |             |            |            |            |             |            |             |             |             |            |             |             |             |                                                                                                                                                                                                                                                                                                                                                                                                                                                                                                                                                                                                                                                                                                                                                                          |   |             |             |             |   |             |             |             |   |             |             |             |   |             |             |             |   |             |             |             |   |            |            |             |   |            |             |            |
| O                                                                                                                                                                                                                                                                                                                                                                                                                                                                                                                                                                                                                                                                                                                                                 | 0.26165000  | 0.97772900  | -0.00022500 |             |   |             |             |             |                                                                                                                                                                                                                                                                                                                                                                                                                                                                                                                                                                                                                                                                                                                                                               |             |             |             |                                                                                                                                                                                                                                                                                                                                                                                                                                                                                                                                                                                                                                                                                                                                                                  |            |             |             |            |            |            |             |            |             |             |             |            |             |             |             |                                                                                                                                                                                                                                                                                                                                                                                                                                                                                                                                                                                                                                                                                                                                                                          |   |             |             |             |   |             |             |             |   |             |             |             |   |             |             |             |   |             |             |             |   |            |            |             |   |            |             |            |
| C                                                                                                                                                                                                                                                                                                                                                                                                                                                                                                                                                                                                                                                                                                                                                 | -1.64540500 | -0.88937000 | -0.00009100 |             |   |             |             |             |                                                                                                                                                                                                                                                                                                                                                                                                                                                                                                                                                                                                                                                                                                                                                               |             |             |             |                                                                                                                                                                                                                                                                                                                                                                                                                                                                                                                                                                                                                                                                                                                                                                  |            |             |             |            |            |            |             |            |             |             |             |            |             |             |             |                                                                                                                                                                                                                                                                                                                                                                                                                                                                                                                                                                                                                                                                                                                                                                          |   |             |             |             |   |             |             |             |   |             |             |             |   |             |             |             |   |             |             |             |   |            |            |             |   |            |             |            |
| H                                                                                                                                                                                                                                                                                                                                                                                                                                                                                                                                                                                                                                                                                                                                                 | -1.92393300 | 1.31590500  | -0.00015200 |             |   |             |             |             |                                                                                                                                                                                                                                                                                                                                                                                                                                                                                                                                                                                                                                                                                                                                                               |             |             |             |                                                                                                                                                                                                                                                                                                                                                                                                                                                                                                                                                                                                                                                                                                                                                                  |            |             |             |            |            |            |             |            |             |             |             |            |             |             |             |                                                                                                                                                                                                                                                                                                                                                                                                                                                                                                                                                                                                                                                                                                                                                                          |   |             |             |             |   |             |             |             |   |             |             |             |   |             |             |             |   |             |             |             |   |            |            |             |   |            |             |            |
| H                                                                                                                                                                                                                                                                                                                                                                                                                                                                                                                                                                                                                                                                                                                                                 | -1.52799900 | -1.94738500 | -0.00045600 |             |   |             |             |             |                                                                                                                                                                                                                                                                                                                                                                                                                                                                                                                                                                                                                                                                                                                                                               |             |             |             |                                                                                                                                                                                                                                                                                                                                                                                                                                                                                                                                                                                                                                                                                                                                                                  |            |             |             |            |            |            |             |            |             |             |             |            |             |             |             |                                                                                                                                                                                                                                                                                                                                                                                                                                                                                                                                                                                                                                                                                                                                                                          |   |             |             |             |   |             |             |             |   |             |             |             |   |             |             |             |   |             |             |             |   |            |            |             |   |            |             |            |
| N                                                                                                                                                                                                                                                                                                                                                                                                                                                                                                                                                                                                                                                                                                                                                 | 1.17249300  | 0.08566000  | 0.00023000  |             |   |             |             |             |                                                                                                                                                                                                                                                                                                                                                                                                                                                                                                                                                                                                                                                                                                                                                               |             |             |             |                                                                                                                                                                                                                                                                                                                                                                                                                                                                                                                                                                                                                                                                                                                                                                  |            |             |             |            |            |            |             |            |             |             |             |            |             |             |             |                                                                                                                                                                                                                                                                                                                                                                                                                                                                                                                                                                                                                                                                                                                                                                          |   |             |             |             |   |             |             |             |   |             |             |             |   |             |             |             |   |             |             |             |   |            |            |             |   |            |             |            |
| C                                                                                                                                                                                                                                                                                                                                                                                                                                                                                                                                                                                                                                                                                                                                                 | 2.01192700  | -0.74215900 | 0.00039000  |             |   |             |             |             |                                                                                                                                                                                                                                                                                                                                                                                                                                                                                                                                                                                                                                                                                                                                                               |             |             |             |                                                                                                                                                                                                                                                                                                                                                                                                                                                                                                                                                                                                                                                                                                                                                                  |            |             |             |            |            |            |             |            |             |             |             |            |             |             |             |                                                                                                                                                                                                                                                                                                                                                                                                                                                                                                                                                                                                                                                                                                                                                                          |   |             |             |             |   |             |             |             |   |             |             |             |   |             |             |             |   |             |             |             |   |            |            |             |   |            |             |            |
|  <p style="text-align: center;"><b>28</b></p> <table border="1"> <tbody> <tr><td>N</td><td>0.00000000</td><td>0.11928500</td><td>0.00000000</td></tr> <tr><td>C</td><td>0.00481600</td><td>1.32292400</td><td>0.00000000</td></tr> <tr><td>O</td><td>-0.00361200</td><td>-1.09656800</td><td>0.00000000</td></tr> </tbody> </table>                                                                                                                                                                                                                                                                                                                            | N           | 0.00000000  | 0.11928500  | 0.00000000  | C | 0.00481600  | 1.32292400  | 0.00000000  | O                                                                                                                                                                                                                                                                                                                                                                                                                                                                                                                                                                                                                                                                                                                                                             | -0.00361200 | -1.09656800 | 0.00000000  |  <p style="text-align: center;"><b>TS<sub>3c-33</sub></b></p> <table border="1"> <tbody> <tr><td>C</td><td>0.00000000</td><td>1.15741900</td><td>0.00000000</td></tr> <tr><td>C</td><td>1.14695400</td><td>0.29271700</td><td>0.00000000</td></tr> <tr><td>C</td><td>1.09453600</td><td>-0.95573500</td><td>0.00000000</td></tr> <tr><td>O</td><td>-0.89952100</td><td>-0.80776000</td><td>0.00000000</td></tr> <tr><td>H</td><td>-0.02014000</td><td>2.23302400</td><td>0.00000000</td></tr> <tr><td>H</td><td>1.39867000</td><td>-1.97675700</td><td>0.00000000</td></tr> <tr><td>N</td><td>-1.09018700</td><td>0.46277100</td><td>0.00000000</td></tr> </tbody> </table> | C          | 0.00000000  | 1.15741900  | 0.00000000 | C          | 1.14695400 | 0.29271700  | 0.00000000 | C           | 1.09453600  | -0.95573500 | 0.00000000 | O           | -0.89952100 | -0.80776000 | 0.00000000                                                                                                                                                                                                                                                                                                                                                                                                                                                                                                                                                                                                                                                                                                                                                               | H | -0.02014000 | 2.23302400  | 0.00000000  | H | 1.39867000  | -1.97675700 | 0.00000000  | N | -1.09018700 | 0.46277100  | 0.00000000  |   |             |             |             |   |             |             |             |   |            |            |             |   |            |             |            |
| N                                                                                                                                                                                                                                                                                                                                                                                                                                                                                                                                                                                                                                                                                                                                                 | 0.00000000  | 0.11928500  | 0.00000000  |             |   |             |             |             |                                                                                                                                                                                                                                                                                                                                                                                                                                                                                                                                                                                                                                                                                                                                                               |             |             |             |                                                                                                                                                                                                                                                                                                                                                                                                                                                                                                                                                                                                                                                                                                                                                                  |            |             |             |            |            |            |             |            |             |             |             |            |             |             |             |                                                                                                                                                                                                                                                                                                                                                                                                                                                                                                                                                                                                                                                                                                                                                                          |   |             |             |             |   |             |             |             |   |             |             |             |   |             |             |             |   |             |             |             |   |            |            |             |   |            |             |            |
| C                                                                                                                                                                                                                                                                                                                                                                                                                                                                                                                                                                                                                                                                                                                                                 | 0.00481600  | 1.32292400  | 0.00000000  |             |   |             |             |             |                                                                                                                                                                                                                                                                                                                                                                                                                                                                                                                                                                                                                                                                                                                                                               |             |             |             |                                                                                                                                                                                                                                                                                                                                                                                                                                                                                                                                                                                                                                                                                                                                                                  |            |             |             |            |            |            |             |            |             |             |             |            |             |             |             |                                                                                                                                                                                                                                                                                                                                                                                                                                                                                                                                                                                                                                                                                                                                                                          |   |             |             |             |   |             |             |             |   |             |             |             |   |             |             |             |   |             |             |             |   |            |            |             |   |            |             |            |
| O                                                                                                                                                                                                                                                                                                                                                                                                                                                                                                                                                                                                                                                                                                                                                 | -0.00361200 | -1.09656800 | 0.00000000  |             |   |             |             |             |                                                                                                                                                                                                                                                                                                                                                                                                                                                                                                                                                                                                                                                                                                                                                               |             |             |             |                                                                                                                                                                                                                                                                                                                                                                                                                                                                                                                                                                                                                                                                                                                                                                  |            |             |             |            |            |            |             |            |             |             |             |            |             |             |             |                                                                                                                                                                                                                                                                                                                                                                                                                                                                                                                                                                                                                                                                                                                                                                          |   |             |             |             |   |             |             |             |   |             |             |             |   |             |             |             |   |             |             |             |   |            |            |             |   |            |             |            |
| C                                                                                                                                                                                                                                                                                                                                                                                                                                                                                                                                                                                                                                                                                                                                                 | 0.00000000  | 1.15741900  | 0.00000000  |             |   |             |             |             |                                                                                                                                                                                                                                                                                                                                                                                                                                                                                                                                                                                                                                                                                                                                                               |             |             |             |                                                                                                                                                                                                                                                                                                                                                                                                                                                                                                                                                                                                                                                                                                                                                                  |            |             |             |            |            |            |             |            |             |             |             |            |             |             |             |                                                                                                                                                                                                                                                                                                                                                                                                                                                                                                                                                                                                                                                                                                                                                                          |   |             |             |             |   |             |             |             |   |             |             |             |   |             |             |             |   |             |             |             |   |            |            |             |   |            |             |            |
| C                                                                                                                                                                                                                                                                                                                                                                                                                                                                                                                                                                                                                                                                                                                                                 | 1.14695400  | 0.29271700  | 0.00000000  |             |   |             |             |             |                                                                                                                                                                                                                                                                                                                                                                                                                                                                                                                                                                                                                                                                                                                                                               |             |             |             |                                                                                                                                                                                                                                                                                                                                                                                                                                                                                                                                                                                                                                                                                                                                                                  |            |             |             |            |            |            |             |            |             |             |             |            |             |             |             |                                                                                                                                                                                                                                                                                                                                                                                                                                                                                                                                                                                                                                                                                                                                                                          |   |             |             |             |   |             |             |             |   |             |             |             |   |             |             |             |   |             |             |             |   |            |            |             |   |            |             |            |
| C                                                                                                                                                                                                                                                                                                                                                                                                                                                                                                                                                                                                                                                                                                                                                 | 1.09453600  | -0.95573500 | 0.00000000  |             |   |             |             |             |                                                                                                                                                                                                                                                                                                                                                                                                                                                                                                                                                                                                                                                                                                                                                               |             |             |             |                                                                                                                                                                                                                                                                                                                                                                                                                                                                                                                                                                                                                                                                                                                                                                  |            |             |             |            |            |            |             |            |             |             |             |            |             |             |             |                                                                                                                                                                                                                                                                                                                                                                                                                                                                                                                                                                                                                                                                                                                                                                          |   |             |             |             |   |             |             |             |   |             |             |             |   |             |             |             |   |             |             |             |   |            |            |             |   |            |             |            |
| O                                                                                                                                                                                                                                                                                                                                                                                                                                                                                                                                                                                                                                                                                                                                                 | -0.89952100 | -0.80776000 | 0.00000000  |             |   |             |             |             |                                                                                                                                                                                                                                                                                                                                                                                                                                                                                                                                                                                                                                                                                                                                                               |             |             |             |                                                                                                                                                                                                                                                                                                                                                                                                                                                                                                                                                                                                                                                                                                                                                                  |            |             |             |            |            |            |             |            |             |             |             |            |             |             |             |                                                                                                                                                                                                                                                                                                                                                                                                                                                                                                                                                                                                                                                                                                                                                                          |   |             |             |             |   |             |             |             |   |             |             |             |   |             |             |             |   |             |             |             |   |            |            |             |   |            |             |            |
| H                                                                                                                                                                                                                                                                                                                                                                                                                                                                                                                                                                                                                                                                                                                                                 | -0.02014000 | 2.23302400  | 0.00000000  |             |   |             |             |             |                                                                                                                                                                                                                                                                                                                                                                                                                                                                                                                                                                                                                                                                                                                                                               |             |             |             |                                                                                                                                                                                                                                                                                                                                                                                                                                                                                                                                                                                                                                                                                                                                                                  |            |             |             |            |            |            |             |            |             |             |             |            |             |             |             |                                                                                                                                                                                                                                                                                                                                                                                                                                                                                                                                                                                                                                                                                                                                                                          |   |             |             |             |   |             |             |             |   |             |             |             |   |             |             |             |   |             |             |             |   |            |            |             |   |            |             |            |
| H                                                                                                                                                                                                                                                                                                                                                                                                                                                                                                                                                                                                                                                                                                                                                 | 1.39867000  | -1.97675700 | 0.00000000  |             |   |             |             |             |                                                                                                                                                                                                                                                                                                                                                                                                                                                                                                                                                                                                                                                                                                                                                               |             |             |             |                                                                                                                                                                                                                                                                                                                                                                                                                                                                                                                                                                                                                                                                                                                                                                  |            |             |             |            |            |            |             |            |             |             |             |            |             |             |             |                                                                                                                                                                                                                                                                                                                                                                                                                                                                                                                                                                                                                                                                                                                                                                          |   |             |             |             |   |             |             |             |   |             |             |             |   |             |             |             |   |             |             |             |   |            |            |             |   |            |             |            |
| N                                                                                                                                                                                                                                                                                                                                                                                                                                                                                                                                                                                                                                                                                                                                                 | -1.09018700 | 0.46277100  | 0.00000000  |             |   |             |             |             |                                                                                                                                                                                                                                                                                                                                                                                                                                                                                                                                                                                                                                                                                                                                                               |             |             |             |                                                                                                                                                                                                                                                                                                                                                                                                                                                                                                                                                                                                                                                                                                                                                                  |            |             |             |            |            |            |             |            |             |             |             |            |             |             |             |                                                                                                                                                                                                                                                                                                                                                                                                                                                                                                                                                                                                                                                                                                                                                                          |   |             |             |             |   |             |             |             |   |             |             |             |   |             |             |             |   |             |             |             |   |            |            |             |   |            |             |            |

|                                                                                                                                                                                                                                                                                                                                                                                                                                                                                                                                                                                                                                                                                                                                                                    |             |             |             |            |   |             |             |             |   |             |             |             |   |             |             |            |   |             |             |            |   |             |             |             |   |             |             |             |                                                                                                                                                                                                                                                                                                                                                                                                                                                                                                                                                                                                                                                                                                                                                                    |   |             |             |             |   |             |             |            |   |            |             |            |   |             |             |             |   |             |            |            |   |             |             |            |   |             |             |             |
|--------------------------------------------------------------------------------------------------------------------------------------------------------------------------------------------------------------------------------------------------------------------------------------------------------------------------------------------------------------------------------------------------------------------------------------------------------------------------------------------------------------------------------------------------------------------------------------------------------------------------------------------------------------------------------------------------------------------------------------------------------------------|-------------|-------------|-------------|------------|---|-------------|-------------|-------------|---|-------------|-------------|-------------|---|-------------|-------------|------------|---|-------------|-------------|------------|---|-------------|-------------|-------------|---|-------------|-------------|-------------|--------------------------------------------------------------------------------------------------------------------------------------------------------------------------------------------------------------------------------------------------------------------------------------------------------------------------------------------------------------------------------------------------------------------------------------------------------------------------------------------------------------------------------------------------------------------------------------------------------------------------------------------------------------------------------------------------------------------------------------------------------------------|---|-------------|-------------|-------------|---|-------------|-------------|------------|---|------------|-------------|------------|---|-------------|-------------|-------------|---|-------------|------------|------------|---|-------------|-------------|------------|---|-------------|-------------|-------------|
| 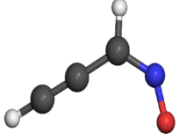 <p style="text-align: center;"><b>33</b></p> <table border="1"> <tbody> <tr><td>C</td><td>2.09537100</td><td>-0.68467000</td><td>0.00000000</td></tr> <tr><td>O</td><td>-1.73287600</td><td>-0.64450900</td><td>0.00000000</td></tr> <tr><td>C</td><td>0.00000000</td><td>0.88124500</td><td>0.00000000</td></tr> <tr><td>C</td><td>1.12615700</td><td>0.02597300</td><td>0.00000000</td></tr> <tr><td>H</td><td>0.11827400</td><td>1.95421800</td><td>0.00000000</td></tr> <tr><td>N</td><td>-1.21892700</td><td>0.45475200</td><td>0.00000000</td></tr> <tr><td>H</td><td>2.94804700</td><td>-1.31668800</td><td>0.00000000</td></tr> </tbody> </table>                        | C           | 2.09537100  | -0.68467000 | 0.00000000 | O | -1.73287600 | -0.64450900 | 0.00000000  | C | 0.00000000  | 0.88124500  | 0.00000000  | C | 1.12615700  | 0.02597300  | 0.00000000 | H | 0.11827400  | 1.95421800  | 0.00000000 | N | -1.21892700 | 0.45475200  | 0.00000000  | H | 2.94804700  | -1.31668800 | 0.00000000  |  <p style="text-align: center;"><b>TS<sub>33-34</sub></b></p> <table border="1"> <tbody> <tr><td>C</td><td>-2.54866800</td><td>-0.20832900</td><td>-0.00001600</td></tr> <tr><td>C</td><td>-1.33320400</td><td>0.05534600</td><td>0.00004200</td></tr> <tr><td>C</td><td>0.02455700</td><td>0.10680400</td><td>0.00001200</td></tr> <tr><td>H</td><td>-3.57478700</td><td>0.08010500</td><td>-0.00015400</td></tr> <tr><td>H</td><td>-0.76076000</td><td>1.33634400</td><td>0.00000100</td></tr> <tr><td>N</td><td>1.19180300</td><td>-0.15112000</td><td>0.00003200</td></tr> <tr><td>O</td><td>2.39210200</td><td>-0.01019200</td><td>-0.00003800</td></tr> </tbody> </table> | C | -2.54866800 | -0.20832900 | -0.00001600 | C | -1.33320400 | 0.05534600  | 0.00004200 | C | 0.02455700 | 0.10680400  | 0.00001200 | H | -3.57478700 | 0.08010500  | -0.00015400 | H | -0.76076000 | 1.33634400 | 0.00000100 | N | 1.19180300  | -0.15112000 | 0.00003200 | O | 2.39210200  | -0.01019200 | -0.00003800 |
| C                                                                                                                                                                                                                                                                                                                                                                                                                                                                                                                                                                                                                                                                                                                                                                  | 2.09537100  | -0.68467000 | 0.00000000  |            |   |             |             |             |   |             |             |             |   |             |             |            |   |             |             |            |   |             |             |             |   |             |             |             |                                                                                                                                                                                                                                                                                                                                                                                                                                                                                                                                                                                                                                                                                                                                                                    |   |             |             |             |   |             |             |            |   |            |             |            |   |             |             |             |   |             |            |            |   |             |             |            |   |             |             |             |
| O                                                                                                                                                                                                                                                                                                                                                                                                                                                                                                                                                                                                                                                                                                                                                                  | -1.73287600 | -0.64450900 | 0.00000000  |            |   |             |             |             |   |             |             |             |   |             |             |            |   |             |             |            |   |             |             |             |   |             |             |             |                                                                                                                                                                                                                                                                                                                                                                                                                                                                                                                                                                                                                                                                                                                                                                    |   |             |             |             |   |             |             |            |   |            |             |            |   |             |             |             |   |             |            |            |   |             |             |            |   |             |             |             |
| C                                                                                                                                                                                                                                                                                                                                                                                                                                                                                                                                                                                                                                                                                                                                                                  | 0.00000000  | 0.88124500  | 0.00000000  |            |   |             |             |             |   |             |             |             |   |             |             |            |   |             |             |            |   |             |             |             |   |             |             |             |                                                                                                                                                                                                                                                                                                                                                                                                                                                                                                                                                                                                                                                                                                                                                                    |   |             |             |             |   |             |             |            |   |            |             |            |   |             |             |             |   |             |            |            |   |             |             |            |   |             |             |             |
| C                                                                                                                                                                                                                                                                                                                                                                                                                                                                                                                                                                                                                                                                                                                                                                  | 1.12615700  | 0.02597300  | 0.00000000  |            |   |             |             |             |   |             |             |             |   |             |             |            |   |             |             |            |   |             |             |             |   |             |             |             |                                                                                                                                                                                                                                                                                                                                                                                                                                                                                                                                                                                                                                                                                                                                                                    |   |             |             |             |   |             |             |            |   |            |             |            |   |             |             |             |   |             |            |            |   |             |             |            |   |             |             |             |
| H                                                                                                                                                                                                                                                                                                                                                                                                                                                                                                                                                                                                                                                                                                                                                                  | 0.11827400  | 1.95421800  | 0.00000000  |            |   |             |             |             |   |             |             |             |   |             |             |            |   |             |             |            |   |             |             |             |   |             |             |             |                                                                                                                                                                                                                                                                                                                                                                                                                                                                                                                                                                                                                                                                                                                                                                    |   |             |             |             |   |             |             |            |   |            |             |            |   |             |             |             |   |             |            |            |   |             |             |            |   |             |             |             |
| N                                                                                                                                                                                                                                                                                                                                                                                                                                                                                                                                                                                                                                                                                                                                                                  | -1.21892700 | 0.45475200  | 0.00000000  |            |   |             |             |             |   |             |             |             |   |             |             |            |   |             |             |            |   |             |             |             |   |             |             |             |                                                                                                                                                                                                                                                                                                                                                                                                                                                                                                                                                                                                                                                                                                                                                                    |   |             |             |             |   |             |             |            |   |            |             |            |   |             |             |             |   |             |            |            |   |             |             |            |   |             |             |             |
| H                                                                                                                                                                                                                                                                                                                                                                                                                                                                                                                                                                                                                                                                                                                                                                  | 2.94804700  | -1.31668800 | 0.00000000  |            |   |             |             |             |   |             |             |             |   |             |             |            |   |             |             |            |   |             |             |             |   |             |             |             |                                                                                                                                                                                                                                                                                                                                                                                                                                                                                                                                                                                                                                                                                                                                                                    |   |             |             |             |   |             |             |            |   |            |             |            |   |             |             |             |   |             |            |            |   |             |             |            |   |             |             |             |
| C                                                                                                                                                                                                                                                                                                                                                                                                                                                                                                                                                                                                                                                                                                                                                                  | -2.54866800 | -0.20832900 | -0.00001600 |            |   |             |             |             |   |             |             |             |   |             |             |            |   |             |             |            |   |             |             |             |   |             |             |             |                                                                                                                                                                                                                                                                                                                                                                                                                                                                                                                                                                                                                                                                                                                                                                    |   |             |             |             |   |             |             |            |   |            |             |            |   |             |             |             |   |             |            |            |   |             |             |            |   |             |             |             |
| C                                                                                                                                                                                                                                                                                                                                                                                                                                                                                                                                                                                                                                                                                                                                                                  | -1.33320400 | 0.05534600  | 0.00004200  |            |   |             |             |             |   |             |             |             |   |             |             |            |   |             |             |            |   |             |             |             |   |             |             |             |                                                                                                                                                                                                                                                                                                                                                                                                                                                                                                                                                                                                                                                                                                                                                                    |   |             |             |             |   |             |             |            |   |            |             |            |   |             |             |             |   |             |            |            |   |             |             |            |   |             |             |             |
| C                                                                                                                                                                                                                                                                                                                                                                                                                                                                                                                                                                                                                                                                                                                                                                  | 0.02455700  | 0.10680400  | 0.00001200  |            |   |             |             |             |   |             |             |             |   |             |             |            |   |             |             |            |   |             |             |             |   |             |             |             |                                                                                                                                                                                                                                                                                                                                                                                                                                                                                                                                                                                                                                                                                                                                                                    |   |             |             |             |   |             |             |            |   |            |             |            |   |             |             |             |   |             |            |            |   |             |             |            |   |             |             |             |
| H                                                                                                                                                                                                                                                                                                                                                                                                                                                                                                                                                                                                                                                                                                                                                                  | -3.57478700 | 0.08010500  | -0.00015400 |            |   |             |             |             |   |             |             |             |   |             |             |            |   |             |             |            |   |             |             |             |   |             |             |             |                                                                                                                                                                                                                                                                                                                                                                                                                                                                                                                                                                                                                                                                                                                                                                    |   |             |             |             |   |             |             |            |   |            |             |            |   |             |             |             |   |             |            |            |   |             |             |            |   |             |             |             |
| H                                                                                                                                                                                                                                                                                                                                                                                                                                                                                                                                                                                                                                                                                                                                                                  | -0.76076000 | 1.33634400  | 0.00000100  |            |   |             |             |             |   |             |             |             |   |             |             |            |   |             |             |            |   |             |             |             |   |             |             |             |                                                                                                                                                                                                                                                                                                                                                                                                                                                                                                                                                                                                                                                                                                                                                                    |   |             |             |             |   |             |             |            |   |            |             |            |   |             |             |             |   |             |            |            |   |             |             |            |   |             |             |             |
| N                                                                                                                                                                                                                                                                                                                                                                                                                                                                                                                                                                                                                                                                                                                                                                  | 1.19180300  | -0.15112000 | 0.00003200  |            |   |             |             |             |   |             |             |             |   |             |             |            |   |             |             |            |   |             |             |             |   |             |             |             |                                                                                                                                                                                                                                                                                                                                                                                                                                                                                                                                                                                                                                                                                                                                                                    |   |             |             |             |   |             |             |            |   |            |             |            |   |             |             |             |   |             |            |            |   |             |             |            |   |             |             |             |
| O                                                                                                                                                                                                                                                                                                                                                                                                                                                                                                                                                                                                                                                                                                                                                                  | 2.39210200  | -0.01019200 | -0.00003800 |            |   |             |             |             |   |             |             |             |   |             |             |            |   |             |             |            |   |             |             |             |   |             |             |             |                                                                                                                                                                                                                                                                                                                                                                                                                                                                                                                                                                                                                                                                                                                                                                    |   |             |             |             |   |             |             |            |   |            |             |            |   |             |             |             |   |             |            |            |   |             |             |            |   |             |             |             |
|  <p style="text-align: center;"><b>34</b></p> <table border="1"> <tbody> <tr><td>C</td><td>2.22505900</td><td>-0.86277900</td><td>0.00000000</td></tr> <tr><td>C</td><td>1.41616500</td><td>0.17485100</td><td>0.00000000</td></tr> <tr><td>C</td><td>0.00000000</td><td>0.10682400</td><td>0.00000000</td></tr> <tr><td>H</td><td>3.28950100</td><td>-1.02558300</td><td>0.00000000</td></tr> <tr><td>N</td><td>-1.15704000</td><td>0.19178900</td><td>0.00000000</td></tr> <tr><td>H</td><td>1.84038300</td><td>1.18241100</td><td>0.00000000</td></tr> <tr><td>O</td><td>-2.35974400</td><td>0.24840900</td><td>0.00000000</td></tr> </tbody> </table>                         | C           | 2.22505900  | -0.86277900 | 0.00000000 | C | 1.41616500  | 0.17485100  | 0.00000000  | C | 0.00000000  | 0.10682400  | 0.00000000  | H | 3.28950100  | -1.02558300 | 0.00000000 | N | -1.15704000 | 0.19178900  | 0.00000000 | H | 1.84038300  | 1.18241100  | 0.00000000  | O | -2.35974400 | 0.24840900  | 0.00000000  |  <p style="text-align: center;"><b>TS<sub>34-6,28</sub></b></p> <table border="1"> <tbody> <tr><td>C</td><td>-1.55993400</td><td>-1.22552300</td><td>0.00000000</td></tr> <tr><td>C</td><td>-1.86442100</td><td>-0.04879900</td><td>0.00000000</td></tr> <tr><td>C</td><td>0.00000000</td><td>1.07058800</td><td>0.00000000</td></tr> <tr><td>H</td><td>-1.13611500</td><td>-2.20064900</td><td>0.00000000</td></tr> <tr><td>N</td><td>1.02646700</td><td>0.44783500</td><td>0.00000000</td></tr> <tr><td>H</td><td>-2.46856100</td><td>0.82576700</td><td>0.00000000</td></tr> <tr><td>O</td><td>2.12069300</td><td>-0.06719500</td><td>0.00000000</td></tr> </tbody> </table> | C | -1.55993400 | -1.22552300 | 0.00000000  | C | -1.86442100 | -0.04879900 | 0.00000000 | C | 0.00000000 | 1.07058800  | 0.00000000 | H | -1.13611500 | -2.20064900 | 0.00000000  | N | 1.02646700  | 0.44783500 | 0.00000000 | H | -2.46856100 | 0.82576700  | 0.00000000 | O | 2.12069300  | -0.06719500 | 0.00000000  |
| C                                                                                                                                                                                                                                                                                                                                                                                                                                                                                                                                                                                                                                                                                                                                                                  | 2.22505900  | -0.86277900 | 0.00000000  |            |   |             |             |             |   |             |             |             |   |             |             |            |   |             |             |            |   |             |             |             |   |             |             |             |                                                                                                                                                                                                                                                                                                                                                                                                                                                                                                                                                                                                                                                                                                                                                                    |   |             |             |             |   |             |             |            |   |            |             |            |   |             |             |             |   |             |            |            |   |             |             |            |   |             |             |             |
| C                                                                                                                                                                                                                                                                                                                                                                                                                                                                                                                                                                                                                                                                                                                                                                  | 1.41616500  | 0.17485100  | 0.00000000  |            |   |             |             |             |   |             |             |             |   |             |             |            |   |             |             |            |   |             |             |             |   |             |             |             |                                                                                                                                                                                                                                                                                                                                                                                                                                                                                                                                                                                                                                                                                                                                                                    |   |             |             |             |   |             |             |            |   |            |             |            |   |             |             |             |   |             |            |            |   |             |             |            |   |             |             |             |
| C                                                                                                                                                                                                                                                                                                                                                                                                                                                                                                                                                                                                                                                                                                                                                                  | 0.00000000  | 0.10682400  | 0.00000000  |            |   |             |             |             |   |             |             |             |   |             |             |            |   |             |             |            |   |             |             |             |   |             |             |             |                                                                                                                                                                                                                                                                                                                                                                                                                                                                                                                                                                                                                                                                                                                                                                    |   |             |             |             |   |             |             |            |   |            |             |            |   |             |             |             |   |             |            |            |   |             |             |            |   |             |             |             |
| H                                                                                                                                                                                                                                                                                                                                                                                                                                                                                                                                                                                                                                                                                                                                                                  | 3.28950100  | -1.02558300 | 0.00000000  |            |   |             |             |             |   |             |             |             |   |             |             |            |   |             |             |            |   |             |             |             |   |             |             |             |                                                                                                                                                                                                                                                                                                                                                                                                                                                                                                                                                                                                                                                                                                                                                                    |   |             |             |             |   |             |             |            |   |            |             |            |   |             |             |             |   |             |            |            |   |             |             |            |   |             |             |             |
| N                                                                                                                                                                                                                                                                                                                                                                                                                                                                                                                                                                                                                                                                                                                                                                  | -1.15704000 | 0.19178900  | 0.00000000  |            |   |             |             |             |   |             |             |             |   |             |             |            |   |             |             |            |   |             |             |             |   |             |             |             |                                                                                                                                                                                                                                                                                                                                                                                                                                                                                                                                                                                                                                                                                                                                                                    |   |             |             |             |   |             |             |            |   |            |             |            |   |             |             |             |   |             |            |            |   |             |             |            |   |             |             |             |
| H                                                                                                                                                                                                                                                                                                                                                                                                                                                                                                                                                                                                                                                                                                                                                                  | 1.84038300  | 1.18241100  | 0.00000000  |            |   |             |             |             |   |             |             |             |   |             |             |            |   |             |             |            |   |             |             |             |   |             |             |             |                                                                                                                                                                                                                                                                                                                                                                                                                                                                                                                                                                                                                                                                                                                                                                    |   |             |             |             |   |             |             |            |   |            |             |            |   |             |             |             |   |             |            |            |   |             |             |            |   |             |             |             |
| O                                                                                                                                                                                                                                                                                                                                                                                                                                                                                                                                                                                                                                                                                                                                                                  | -2.35974400 | 0.24840900  | 0.00000000  |            |   |             |             |             |   |             |             |             |   |             |             |            |   |             |             |            |   |             |             |             |   |             |             |             |                                                                                                                                                                                                                                                                                                                                                                                                                                                                                                                                                                                                                                                                                                                                                                    |   |             |             |             |   |             |             |            |   |            |             |            |   |             |             |             |   |             |            |            |   |             |             |            |   |             |             |             |
| C                                                                                                                                                                                                                                                                                                                                                                                                                                                                                                                                                                                                                                                                                                                                                                  | -1.55993400 | -1.22552300 | 0.00000000  |            |   |             |             |             |   |             |             |             |   |             |             |            |   |             |             |            |   |             |             |             |   |             |             |             |                                                                                                                                                                                                                                                                                                                                                                                                                                                                                                                                                                                                                                                                                                                                                                    |   |             |             |             |   |             |             |            |   |            |             |            |   |             |             |             |   |             |            |            |   |             |             |            |   |             |             |             |
| C                                                                                                                                                                                                                                                                                                                                                                                                                                                                                                                                                                                                                                                                                                                                                                  | -1.86442100 | -0.04879900 | 0.00000000  |            |   |             |             |             |   |             |             |             |   |             |             |            |   |             |             |            |   |             |             |             |   |             |             |             |                                                                                                                                                                                                                                                                                                                                                                                                                                                                                                                                                                                                                                                                                                                                                                    |   |             |             |             |   |             |             |            |   |            |             |            |   |             |             |             |   |             |            |            |   |             |             |            |   |             |             |             |
| C                                                                                                                                                                                                                                                                                                                                                                                                                                                                                                                                                                                                                                                                                                                                                                  | 0.00000000  | 1.07058800  | 0.00000000  |            |   |             |             |             |   |             |             |             |   |             |             |            |   |             |             |            |   |             |             |             |   |             |             |             |                                                                                                                                                                                                                                                                                                                                                                                                                                                                                                                                                                                                                                                                                                                                                                    |   |             |             |             |   |             |             |            |   |            |             |            |   |             |             |             |   |             |            |            |   |             |             |            |   |             |             |             |
| H                                                                                                                                                                                                                                                                                                                                                                                                                                                                                                                                                                                                                                                                                                                                                                  | -1.13611500 | -2.20064900 | 0.00000000  |            |   |             |             |             |   |             |             |             |   |             |             |            |   |             |             |            |   |             |             |             |   |             |             |             |                                                                                                                                                                                                                                                                                                                                                                                                                                                                                                                                                                                                                                                                                                                                                                    |   |             |             |             |   |             |             |            |   |            |             |            |   |             |             |             |   |             |            |            |   |             |             |            |   |             |             |             |
| N                                                                                                                                                                                                                                                                                                                                                                                                                                                                                                                                                                                                                                                                                                                                                                  | 1.02646700  | 0.44783500  | 0.00000000  |            |   |             |             |             |   |             |             |             |   |             |             |            |   |             |             |            |   |             |             |             |   |             |             |             |                                                                                                                                                                                                                                                                                                                                                                                                                                                                                                                                                                                                                                                                                                                                                                    |   |             |             |             |   |             |             |            |   |            |             |            |   |             |             |             |   |             |            |            |   |             |             |            |   |             |             |             |
| H                                                                                                                                                                                                                                                                                                                                                                                                                                                                                                                                                                                                                                                                                                                                                                  | -2.46856100 | 0.82576700  | 0.00000000  |            |   |             |             |             |   |             |             |             |   |             |             |            |   |             |             |            |   |             |             |             |   |             |             |             |                                                                                                                                                                                                                                                                                                                                                                                                                                                                                                                                                                                                                                                                                                                                                                    |   |             |             |             |   |             |             |            |   |            |             |            |   |             |             |             |   |             |            |            |   |             |             |            |   |             |             |             |
| O                                                                                                                                                                                                                                                                                                                                                                                                                                                                                                                                                                                                                                                                                                                                                                  | 2.12069300  | -0.06719500 | 0.00000000  |            |   |             |             |             |   |             |             |             |   |             |             |            |   |             |             |            |   |             |             |             |   |             |             |             |                                                                                                                                                                                                                                                                                                                                                                                                                                                                                                                                                                                                                                                                                                                                                                    |   |             |             |             |   |             |             |            |   |            |             |            |   |             |             |             |   |             |            |            |   |             |             |            |   |             |             |             |
|  <p style="text-align: center;"><b>TS<sub>3d-41</sub></b></p> <table border="1"> <tbody> <tr><td>O</td><td>-1.24656800</td><td>-0.34105100</td><td>0.00027500</td></tr> <tr><td>C</td><td>-0.80492100</td><td>0.80143800</td><td>-0.00041200</td></tr> <tr><td>C</td><td>0.52388800</td><td>1.08361400</td><td>-0.00011500</td></tr> <tr><td>C</td><td>1.08046900</td><td>-0.23599200</td><td>0.00016100</td></tr> <tr><td>H</td><td>1.02956200</td><td>2.02815800</td><td>0.00123600</td></tr> <tr><td>H</td><td>2.14126400</td><td>-0.46439300</td><td>-0.00045600</td></tr> <tr><td>N</td><td>0.28644300</td><td>-1.24710300</td><td>-0.00011300</td></tr> </tbody> </table> | O           | -1.24656800 | -0.34105100 | 0.00027500 | C | -0.80492100 | 0.80143800  | -0.00041200 | C | 0.52388800  | 1.08361400  | -0.00011500 | C | 1.08046900  | -0.23599200 | 0.00016100 | H | 1.02956200  | 2.02815800  | 0.00123600 | H | 2.14126400  | -0.46439300 | -0.00045600 | N | 0.28644300  | -1.24710300 | -0.00011300 |  <p style="text-align: center;"><b>41</b></p> <table border="1"> <tbody> <tr><td>C</td><td>0.00000000</td><td>1.08277700</td><td>0.00000000</td></tr> <tr><td>C</td><td>1.17809800</td><td>0.28742700</td><td>0.00000000</td></tr> <tr><td>C</td><td>0.63797300</td><td>-0.95538600</td><td>0.00000000</td></tr> <tr><td>O</td><td>-0.65780100</td><td>-0.99482500</td><td>0.00000000</td></tr> <tr><td>H</td><td>-0.07844600</td><td>2.15937800</td><td>0.00000000</td></tr> <tr><td>H</td><td>2.20886300</td><td>0.58334000</td><td>0.00000000</td></tr> <tr><td>N</td><td>-1.10920500</td><td>0.38956700</td><td>0.00000000</td></tr> </tbody> </table>                    | C | 0.00000000  | 1.08277700  | 0.00000000  | C | 1.17809800  | 0.28742700  | 0.00000000 | C | 0.63797300 | -0.95538600 | 0.00000000 | O | -0.65780100 | -0.99482500 | 0.00000000  | H | -0.07844600 | 2.15937800 | 0.00000000 | H | 2.20886300  | 0.58334000  | 0.00000000 | N | -1.10920500 | 0.38956700  | 0.00000000  |
| O                                                                                                                                                                                                                                                                                                                                                                                                                                                                                                                                                                                                                                                                                                                                                                  | -1.24656800 | -0.34105100 | 0.00027500  |            |   |             |             |             |   |             |             |             |   |             |             |            |   |             |             |            |   |             |             |             |   |             |             |             |                                                                                                                                                                                                                                                                                                                                                                                                                                                                                                                                                                                                                                                                                                                                                                    |   |             |             |             |   |             |             |            |   |            |             |            |   |             |             |             |   |             |            |            |   |             |             |            |   |             |             |             |
| C                                                                                                                                                                                                                                                                                                                                                                                                                                                                                                                                                                                                                                                                                                                                                                  | -0.80492100 | 0.80143800  | -0.00041200 |            |   |             |             |             |   |             |             |             |   |             |             |            |   |             |             |            |   |             |             |             |   |             |             |             |                                                                                                                                                                                                                                                                                                                                                                                                                                                                                                                                                                                                                                                                                                                                                                    |   |             |             |             |   |             |             |            |   |            |             |            |   |             |             |             |   |             |            |            |   |             |             |            |   |             |             |             |
| C                                                                                                                                                                                                                                                                                                                                                                                                                                                                                                                                                                                                                                                                                                                                                                  | 0.52388800  | 1.08361400  | -0.00011500 |            |   |             |             |             |   |             |             |             |   |             |             |            |   |             |             |            |   |             |             |             |   |             |             |             |                                                                                                                                                                                                                                                                                                                                                                                                                                                                                                                                                                                                                                                                                                                                                                    |   |             |             |             |   |             |             |            |   |            |             |            |   |             |             |             |   |             |            |            |   |             |             |            |   |             |             |             |
| C                                                                                                                                                                                                                                                                                                                                                                                                                                                                                                                                                                                                                                                                                                                                                                  | 1.08046900  | -0.23599200 | 0.00016100  |            |   |             |             |             |   |             |             |             |   |             |             |            |   |             |             |            |   |             |             |             |   |             |             |             |                                                                                                                                                                                                                                                                                                                                                                                                                                                                                                                                                                                                                                                                                                                                                                    |   |             |             |             |   |             |             |            |   |            |             |            |   |             |             |             |   |             |            |            |   |             |             |            |   |             |             |             |
| H                                                                                                                                                                                                                                                                                                                                                                                                                                                                                                                                                                                                                                                                                                                                                                  | 1.02956200  | 2.02815800  | 0.00123600  |            |   |             |             |             |   |             |             |             |   |             |             |            |   |             |             |            |   |             |             |             |   |             |             |             |                                                                                                                                                                                                                                                                                                                                                                                                                                                                                                                                                                                                                                                                                                                                                                    |   |             |             |             |   |             |             |            |   |            |             |            |   |             |             |             |   |             |            |            |   |             |             |            |   |             |             |             |
| H                                                                                                                                                                                                                                                                                                                                                                                                                                                                                                                                                                                                                                                                                                                                                                  | 2.14126400  | -0.46439300 | -0.00045600 |            |   |             |             |             |   |             |             |             |   |             |             |            |   |             |             |            |   |             |             |             |   |             |             |             |                                                                                                                                                                                                                                                                                                                                                                                                                                                                                                                                                                                                                                                                                                                                                                    |   |             |             |             |   |             |             |            |   |            |             |            |   |             |             |             |   |             |            |            |   |             |             |            |   |             |             |             |
| N                                                                                                                                                                                                                                                                                                                                                                                                                                                                                                                                                                                                                                                                                                                                                                  | 0.28644300  | -1.24710300 | -0.00011300 |            |   |             |             |             |   |             |             |             |   |             |             |            |   |             |             |            |   |             |             |             |   |             |             |             |                                                                                                                                                                                                                                                                                                                                                                                                                                                                                                                                                                                                                                                                                                                                                                    |   |             |             |             |   |             |             |            |   |            |             |            |   |             |             |             |   |             |            |            |   |             |             |            |   |             |             |             |
| C                                                                                                                                                                                                                                                                                                                                                                                                                                                                                                                                                                                                                                                                                                                                                                  | 0.00000000  | 1.08277700  | 0.00000000  |            |   |             |             |             |   |             |             |             |   |             |             |            |   |             |             |            |   |             |             |             |   |             |             |             |                                                                                                                                                                                                                                                                                                                                                                                                                                                                                                                                                                                                                                                                                                                                                                    |   |             |             |             |   |             |             |            |   |            |             |            |   |             |             |             |   |             |            |            |   |             |             |            |   |             |             |             |
| C                                                                                                                                                                                                                                                                                                                                                                                                                                                                                                                                                                                                                                                                                                                                                                  | 1.17809800  | 0.28742700  | 0.00000000  |            |   |             |             |             |   |             |             |             |   |             |             |            |   |             |             |            |   |             |             |             |   |             |             |             |                                                                                                                                                                                                                                                                                                                                                                                                                                                                                                                                                                                                                                                                                                                                                                    |   |             |             |             |   |             |             |            |   |            |             |            |   |             |             |             |   |             |            |            |   |             |             |            |   |             |             |             |
| C                                                                                                                                                                                                                                                                                                                                                                                                                                                                                                                                                                                                                                                                                                                                                                  | 0.63797300  | -0.95538600 | 0.00000000  |            |   |             |             |             |   |             |             |             |   |             |             |            |   |             |             |            |   |             |             |             |   |             |             |             |                                                                                                                                                                                                                                                                                                                                                                                                                                                                                                                                                                                                                                                                                                                                                                    |   |             |             |             |   |             |             |            |   |            |             |            |   |             |             |             |   |             |            |            |   |             |             |            |   |             |             |             |
| O                                                                                                                                                                                                                                                                                                                                                                                                                                                                                                                                                                                                                                                                                                                                                                  | -0.65780100 | -0.99482500 | 0.00000000  |            |   |             |             |             |   |             |             |             |   |             |             |            |   |             |             |            |   |             |             |             |   |             |             |             |                                                                                                                                                                                                                                                                                                                                                                                                                                                                                                                                                                                                                                                                                                                                                                    |   |             |             |             |   |             |             |            |   |            |             |            |   |             |             |             |   |             |            |            |   |             |             |            |   |             |             |             |
| H                                                                                                                                                                                                                                                                                                                                                                                                                                                                                                                                                                                                                                                                                                                                                                  | -0.07844600 | 2.15937800  | 0.00000000  |            |   |             |             |             |   |             |             |             |   |             |             |            |   |             |             |            |   |             |             |             |   |             |             |             |                                                                                                                                                                                                                                                                                                                                                                                                                                                                                                                                                                                                                                                                                                                                                                    |   |             |             |             |   |             |             |            |   |            |             |            |   |             |             |             |   |             |            |            |   |             |             |            |   |             |             |             |
| H                                                                                                                                                                                                                                                                                                                                                                                                                                                                                                                                                                                                                                                                                                                                                                  | 2.20886300  | 0.58334000  | 0.00000000  |            |   |             |             |             |   |             |             |             |   |             |             |            |   |             |             |            |   |             |             |             |   |             |             |             |                                                                                                                                                                                                                                                                                                                                                                                                                                                                                                                                                                                                                                                                                                                                                                    |   |             |             |             |   |             |             |            |   |            |             |            |   |             |             |             |   |             |            |            |   |             |             |            |   |             |             |             |
| N                                                                                                                                                                                                                                                                                                                                                                                                                                                                                                                                                                                                                                                                                                                                                                  | -1.10920500 | 0.38956700  | 0.00000000  |            |   |             |             |             |   |             |             |             |   |             |             |            |   |             |             |            |   |             |             |             |   |             |             |             |                                                                                                                                                                                                                                                                                                                                                                                                                                                                                                                                                                                                                                                                                                                                                                    |   |             |             |             |   |             |             |            |   |            |             |            |   |             |             |             |   |             |            |            |   |             |             |            |   |             |             |             |
|  <p style="text-align: center;"><b>TS<sub>41-42,9</sub></b></p> <table border="1"> <tbody> <tr><td>C</td><td>1.42949200</td><td>-0.13043200</td><td>0.00000000</td></tr> <tr><td>C</td><td>0.00000000</td><td>-1.05916700</td><td>0.00000000</td></tr> <tr><td>C</td><td>-1.16323000</td><td>-0.37956200</td><td>0.00000000</td></tr> <tr><td>O</td><td>-1.75972900</td><td>0.61538100</td><td>0.00000000</td></tr> <tr><td>H</td><td>2.19854400</td><td>-0.90532000</td><td>0.00000000</td></tr> <tr><td>H</td><td>0.09391100</td><td>-2.13263600</td><td>0.00000000</td></tr> <tr><td>N</td><td>1.45540200</td><td>1.07569600</td><td>0.00000000</td></tr> </tbody> </table>  | C           | 1.42949200  | -0.13043200 | 0.00000000 | C | 0.00000000  | -1.05916700 | 0.00000000  | C | -1.16323000 | -0.37956200 | 0.00000000  | O | -1.75972900 | 0.61538100  | 0.00000000 | H | 2.19854400  | -0.90532000 | 0.00000000 | H | 0.09391100  | -2.13263600 | 0.00000000  | N | 1.45540200  | 1.07569600  | 0.00000000  |  <p style="text-align: center;"><b>42</b></p> <table border="1"> <tbody> <tr><td>C</td><td>-1.05982800</td><td>0.68514400</td><td>0.00000000</td></tr> <tr><td>H</td><td>-2.11865000</td><td>0.52999600</td><td>0.00000000</td></tr> <tr><td>C</td><td>0.00000000</td><td>-0.04550800</td><td>0.00000000</td></tr> <tr><td>O</td><td>1.05970200</td><td>-0.54597700</td><td>0.00000000</td></tr> </tbody> </table>                                                                                                                                                                                                                                                            | C | -1.05982800 | 0.68514400  | 0.00000000  | H | -2.11865000 | 0.52999600  | 0.00000000 | C | 0.00000000 | -0.04550800 | 0.00000000 | O | 1.05970200  | -0.54597700 | 0.00000000  |   |             |            |            |   |             |             |            |   |             |             |             |
| C                                                                                                                                                                                                                                                                                                                                                                                                                                                                                                                                                                                                                                                                                                                                                                  | 1.42949200  | -0.13043200 | 0.00000000  |            |   |             |             |             |   |             |             |             |   |             |             |            |   |             |             |            |   |             |             |             |   |             |             |             |                                                                                                                                                                                                                                                                                                                                                                                                                                                                                                                                                                                                                                                                                                                                                                    |   |             |             |             |   |             |             |            |   |            |             |            |   |             |             |             |   |             |            |            |   |             |             |            |   |             |             |             |
| C                                                                                                                                                                                                                                                                                                                                                                                                                                                                                                                                                                                                                                                                                                                                                                  | 0.00000000  | -1.05916700 | 0.00000000  |            |   |             |             |             |   |             |             |             |   |             |             |            |   |             |             |            |   |             |             |             |   |             |             |             |                                                                                                                                                                                                                                                                                                                                                                                                                                                                                                                                                                                                                                                                                                                                                                    |   |             |             |             |   |             |             |            |   |            |             |            |   |             |             |             |   |             |            |            |   |             |             |            |   |             |             |             |
| C                                                                                                                                                                                                                                                                                                                                                                                                                                                                                                                                                                                                                                                                                                                                                                  | -1.16323000 | -0.37956200 | 0.00000000  |            |   |             |             |             |   |             |             |             |   |             |             |            |   |             |             |            |   |             |             |             |   |             |             |             |                                                                                                                                                                                                                                                                                                                                                                                                                                                                                                                                                                                                                                                                                                                                                                    |   |             |             |             |   |             |             |            |   |            |             |            |   |             |             |             |   |             |            |            |   |             |             |            |   |             |             |             |
| O                                                                                                                                                                                                                                                                                                                                                                                                                                                                                                                                                                                                                                                                                                                                                                  | -1.75972900 | 0.61538100  | 0.00000000  |            |   |             |             |             |   |             |             |             |   |             |             |            |   |             |             |            |   |             |             |             |   |             |             |             |                                                                                                                                                                                                                                                                                                                                                                                                                                                                                                                                                                                                                                                                                                                                                                    |   |             |             |             |   |             |             |            |   |            |             |            |   |             |             |             |   |             |            |            |   |             |             |            |   |             |             |             |
| H                                                                                                                                                                                                                                                                                                                                                                                                                                                                                                                                                                                                                                                                                                                                                                  | 2.19854400  | -0.90532000 | 0.00000000  |            |   |             |             |             |   |             |             |             |   |             |             |            |   |             |             |            |   |             |             |             |   |             |             |             |                                                                                                                                                                                                                                                                                                                                                                                                                                                                                                                                                                                                                                                                                                                                                                    |   |             |             |             |   |             |             |            |   |            |             |            |   |             |             |             |   |             |            |            |   |             |             |            |   |             |             |             |
| H                                                                                                                                                                                                                                                                                                                                                                                                                                                                                                                                                                                                                                                                                                                                                                  | 0.09391100  | -2.13263600 | 0.00000000  |            |   |             |             |             |   |             |             |             |   |             |             |            |   |             |             |            |   |             |             |             |   |             |             |             |                                                                                                                                                                                                                                                                                                                                                                                                                                                                                                                                                                                                                                                                                                                                                                    |   |             |             |             |   |             |             |            |   |            |             |            |   |             |             |             |   |             |            |            |   |             |             |            |   |             |             |             |
| N                                                                                                                                                                                                                                                                                                                                                                                                                                                                                                                                                                                                                                                                                                                                                                  | 1.45540200  | 1.07569600  | 0.00000000  |            |   |             |             |             |   |             |             |             |   |             |             |            |   |             |             |            |   |             |             |             |   |             |             |             |                                                                                                                                                                                                                                                                                                                                                                                                                                                                                                                                                                                                                                                                                                                                                                    |   |             |             |             |   |             |             |            |   |            |             |            |   |             |             |             |   |             |            |            |   |             |             |            |   |             |             |             |
| C                                                                                                                                                                                                                                                                                                                                                                                                                                                                                                                                                                                                                                                                                                                                                                  | -1.05982800 | 0.68514400  | 0.00000000  |            |   |             |             |             |   |             |             |             |   |             |             |            |   |             |             |            |   |             |             |             |   |             |             |             |                                                                                                                                                                                                                                                                                                                                                                                                                                                                                                                                                                                                                                                                                                                                                                    |   |             |             |             |   |             |             |            |   |            |             |            |   |             |             |             |   |             |            |            |   |             |             |            |   |             |             |             |
| H                                                                                                                                                                                                                                                                                                                                                                                                                                                                                                                                                                                                                                                                                                                                                                  | -2.11865000 | 0.52999600  | 0.00000000  |            |   |             |             |             |   |             |             |             |   |             |             |            |   |             |             |            |   |             |             |             |   |             |             |             |                                                                                                                                                                                                                                                                                                                                                                                                                                                                                                                                                                                                                                                                                                                                                                    |   |             |             |             |   |             |             |            |   |            |             |            |   |             |             |             |   |             |            |            |   |             |             |            |   |             |             |             |
| C                                                                                                                                                                                                                                                                                                                                                                                                                                                                                                                                                                                                                                                                                                                                                                  | 0.00000000  | -0.04550800 | 0.00000000  |            |   |             |             |             |   |             |             |             |   |             |             |            |   |             |             |            |   |             |             |             |   |             |             |             |                                                                                                                                                                                                                                                                                                                                                                                                                                                                                                                                                                                                                                                                                                                                                                    |   |             |             |             |   |             |             |            |   |            |             |            |   |             |             |             |   |             |            |            |   |             |             |            |   |             |             |             |
| O                                                                                                                                                                                                                                                                                                                                                                                                                                                                                                                                                                                                                                                                                                                                                                  | 1.05970200  | -0.54597700 | 0.00000000  |            |   |             |             |             |   |             |             |             |   |             |             |            |   |             |             |            |   |             |             |             |   |             |             |             |                                                                                                                                                                                                                                                                                                                                                                                                                                                                                                                                                                                                                                                                                                                                                                    |   |             |             |             |   |             |             |            |   |            |             |            |   |             |             |             |   |             |            |            |   |             |             |            |   |             |             |             |

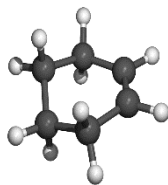

**Cyclohexene**

|   |             |             |             |
|---|-------------|-------------|-------------|
| C | -1.49323900 | 0.04827800  | -0.10977800 |
| C | -0.66272700 | 1.30214400  | -0.05695300 |
| C | 0.66251400  | 1.30227700  | 0.05673000  |
| C | 1.49318700  | 0.04851100  | 0.11007200  |
| C | 0.69700700  | -1.18978200 | -0.31585700 |
| C | -0.69674300 | -1.19002000 | 0.31568300  |
| H | -2.37507500 | 0.16616300  | 0.52634400  |
| H | -1.19219700 | 2.24716600  | -0.11264800 |
| H | 1.19180500  | 2.24738300  | 0.11264200  |
| H | 2.37529100  | 0.16646000  | -0.52560700 |
| H | 0.59533300  | -1.19346000 | -1.40527100 |
| H | -0.59511600 | -1.19399700 | 1.40509100  |
| H | 1.24072000  | -2.09795700 | -0.04865600 |
| H | 1.88311500  | -0.08582900 | 1.12639300  |
| H | -1.88372200 | -0.08610200 | -1.12585000 |
| H | -1.24015700 | -2.09827400 | 0.04818800  |

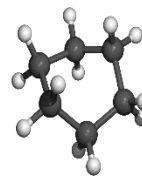

**Cyclohexane**

|   |             |             |             |
|---|-------------|-------------|-------------|
| C | -1.22493300 | 0.66371100  | 0.37979800  |
| C | -0.00024400 | 1.52373200  | 0.00007300  |
| C | 1.22493300  | 0.66431200  | -0.37992200 |
| C | 1.22493300  | -0.66371100 | 0.37979800  |
| C | 0.00024400  | -1.52373200 | 0.00007300  |
| C | -1.22493300 | -0.66431200 | -0.37992200 |
| H | -1.21445100 | 0.45590800  | 1.45354700  |
| H | -0.25421100 | 2.17963000  | -0.83568400 |
| H | 1.21435800  | 0.45682800  | -1.45367800 |
| H | 2.14553700  | -1.21797600 | 0.18866100  |
| H | 0.25421100  | -2.17963000 | -0.83568400 |
| H | -2.14538900 | -1.21869700 | -0.18850800 |
| H | -1.21435800 | -0.45682800 | -1.45367800 |
| H | -0.25341200 | -2.17959400 | 0.83596700  |
| H | 1.21445100  | -0.45590800 | 1.45354700  |
| H | 2.14538900  | 1.21869700  | -0.18850800 |
| H | 0.25341200  | 2.17959400  | 0.83596700  |
| H | -2.14553700 | 1.21797600  | 0.18866100  |
